# Supplementary material for: A concise approach to the tricyclic framework of longipinane- and ent-longipinane-type sesquiterpenoids
Source: Royal Society of Chemistry journal article supplement (doi:10.1039/c8qo01235k), 2018-12-20

## Supporting Information

### A concise approach to the tricyclic framework of longipinane- and *ent*-longipinane-type sesquiterpenoids

Min He,<sup>a</sup> Jiuzhou Yi,<sup>a</sup> Gaoyuan Zhao,<sup>a</sup> Peiqi Chen,<sup>a</sup> Dan Long,<sup>a</sup> Xiaojun Hu,<sup>a</sup> Huilin Li,<sup>a</sup> Xingang Xie,<sup>a</sup> Xiaolei Wang<sup>a</sup> and Xuegong She<sup>\*,a</sup>

<sup>a</sup> State Key Laboratory of Applied Organic Chemistry, Department of Chemistry, Lanzhou University, Lanzhou, 730000, China.

(E-mail: [shexg@lzu.edu.cn](mailto:shexg@lzu.edu.cn))

### Table of Contents

|                                                                   |         |
|-------------------------------------------------------------------|---------|
| 1. General Information.....                                       | S2      |
| 2. Synthesis of <i>cis</i> -fused 6/7 ring system <b>22</b> ..... | S3-S7   |
| 3. General Procedure for radical cyclisation.....                 | S8-S9   |
| 4. Synthesis of several derivatives of natural marsupellins.....  | S9-S15  |
| 6. References.....                                                | S15     |
| 7. X-ray crystal of <b>14</b> .....                               | S16-S21 |
| 8. Copies of Related NMR Spectra.....                             | S22-S59 |

## General information

Oxygen and moisture-sensitive reaction were carried out under argon atmosphere. Solvents THF and toluene were refluxed with Na,  $\text{CH}_2\text{Cl}_2$  was refluxed with  $\text{CaH}_2$  and freshly distilled prior to use. All commercially available reagents were used without further purification unless otherwise noted. Column chromatography was generally performed on silica gel (200-300 mesh) and reactions were monitored by thin layer chromatography (TLC) using silica gel GF254 plates with UV light to visualize the course of reaction. Infrared spectra were recorded on a 670 FT-IR spectrometer.  $^1\text{H}$  and  $^{13}\text{C}$  NMR spectra were recorded on a Bruker AM-400 MHz instrument, and chemical shifts ( $\delta$ ) are given in ppm with reference to solvent signals [ $^1\text{H}$  NMR:  $\text{CDCl}_3$  (7.27),  $\text{CD}_3\text{OD}$  (4.78, 3.31);  $^{13}\text{C}$  NMR:  $\text{CDCl}_3$  (77.0),  $\text{CD}_3\text{OD}$  (49.0)]. High-resolution mass spectral (HRMS) data were recorded on a Bruker Daltonics APEXII 47e FT-ICR spectrometer using electrospray ionization (ESI). Melting points were measured on a Tech X-4 melting point apparatus and were uncorrected.

## Experimental Procedures

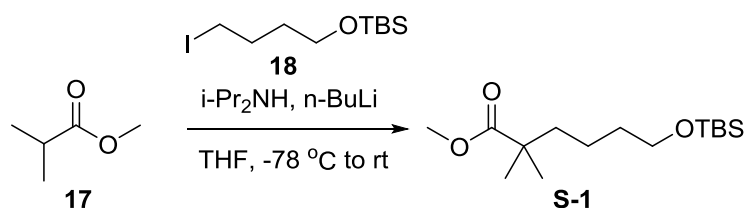

**Methyl 6-((tert-butyldimethylsilyloxy)-2,2-dimethylhexanoate (S-1):** To a stirred solution of diisopropylamine (12.62 mL, 89.54 mmol) in anhydrous THF (200 mL) at  $0\text{ }^\circ\text{C}$  under an argon atmosphere was added  $n\text{-BuLi}$  (32.83 mL, 2.5 M in hexanes, 82.08 mmol) and the solution was stirred at  $0\text{ }^\circ\text{C}$  for 30 min. Then the freshly prepared LDA was cooled to  $-78\text{ }^\circ\text{C}$  and a solution of **17** (8.00 g, 78.35 mmol) in anhydrous THF (50 mL) was added and then stirred for 1 h, after which iodide **18**<sup>1</sup> (23.45 g, 74.62 mmol) in THF (50 mL) solution was added dropwise to the reaction mixture, and the resulting solution was stirred at the same temperature for 0.5 h, the resulting solution was allowed to warm to ambient temperature and stirred for 10 h. The reaction was quenched with saturated aqueous  $\text{NH}_4\text{Cl}$  and extracted with ethyl ether ( $3 \times 50$ ). The combined organic phase was dried with anhydrous sodium sulfate and concentrated in vacuo. The residue was chromatographed on silica-gel column with petroleum/ethyl acetate (50:1) to give the product ester **S-1** (20.67 g, 71.64 mmol, 96% yield) as a colourless oil.

Data for **S-1**

**$^1\text{H}$  NMR** (400 MHz,  $\text{CDCl}_3$ ):  $\delta$  3.65 (s, 3H), 3.59 (t,  $J = 6.5$  Hz, 2H), 1.58 – 1.42 (m, 4H), 1.34 – 1.21 (m, 2H), 1.16 (s, 6H), 0.89 (s, 9H), 0.04 (s, 6H).

**$^{13}\text{C}$  NMR** (100 MHz,  $\text{CDCl}_3$ )  $\delta$  178.4, 62.9, 51.5, 42.3, 40.6, 33.2, 25.9, 25.1, 21.2, 18.3, -5.3.

**HRMS (ESI):** calcd for  $\text{C}_{15}\text{H}_{32}\text{O}_3\text{Si}$  ( $[\text{M} + \text{H}]^+$ ) 289.2193, found 289.2200.

**IR** (neat)  $\nu_{\text{max}}$ : 2952.0, 2931.1, 2858.5, 1735.5, 1473.1, 1462.7, 1256.5, 1193.0, 1144.3, 1103.6, 836.7, 775.4  $\text{cm}^{-1}$ .

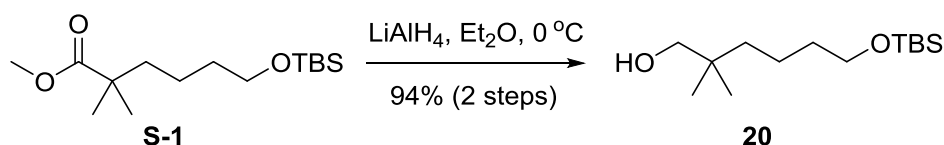

**6-((tert-Butyldimethylsilyl) oxy)-2, 2-dimethylhexan-1-ol (20):** To the stirred solution of above ester **S-1** (20.67 g, 71.64 mmol) in  $\text{Et}_2\text{O}$  (260 mL) at  $0\text{ }^\circ\text{C}$  was added lithium aluminum hydride (2.86 g, 75.22 mmol) portionwise. The reaction mixture was stirred at the same temperature for 20 min. After

which time TLC analysis showed full conversion, the reaction was quenched with H<sub>2</sub>O (2.86 mL), 10 % aqueous NaOH (5.72 mL) and H<sub>2</sub>O (8.58 mL). After stirring at room temperature for 1 h, the mixture was filtered through a short pad of Celite. The filtrate was concentrated under reduced pressure. Purification by flash column chromatography (petroleum ether/ethyl acetate = 2:1) to afford **20** (18.27 g, 70.14 mmol, 94% overall yield for two steps) as a colorless oil.

Data for **20**

**<sup>1</sup>H NMR** (400 MHz, CDCl<sub>3</sub>): δ 3.57 (t, *J* = 6.5 Hz, 2H), 3.24 (s, 2H), 2.06 (s, 1H), 1.50 – 1.40 (m, 2H), 1.31 – 1.14 (m, 4H), 0.85 (s, 9H), 0.81 (s, 6H), -0.00 (s, 6H).

**<sup>13</sup>C NMR** (100 MHz, CDCl<sub>3</sub>): δ 71.70, 63.02, 38.24, 35.00, 33.53, 25.91, 23.80, 19.97, 18.28, -5.31.

**HRMS (ESI)**: calcd for C<sub>14</sub>H<sub>32</sub>O<sub>2</sub>Si ([M + H]<sup>+</sup>) 261.2244, found 261.2248.

**IR** (neat) *v*<sub>max</sub>: 3366.8, 2954.1, 2931.7, 2895.4, 2859.2, 1472.4, 1387.8, 1362.2, 1254.9, 1104.1, 1041.3, 836.4, 810.0, 775.4 cm<sup>-1</sup>.

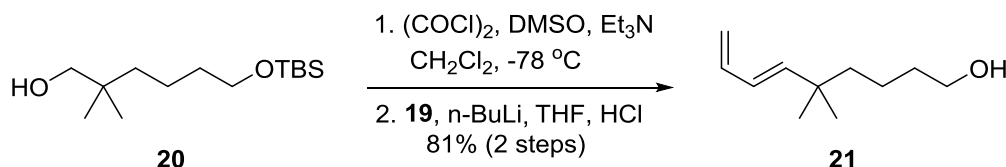

**(E)-5, 5-Dimethylnona-6, 8-dien-1-ol (21)**: To a solution of oxalyl chloride (9.05 mL, 105.32 mmol) in dry CH<sub>2</sub>Cl<sub>2</sub> (150 mL) at -78 °C was added a solution of DMSO (14.94 mL, 210.63 mmol) in dry CH<sub>2</sub>Cl<sub>2</sub> (50 mL). After stirring for 30 min at -78 °C, a solution of **20** (18.29 g, 70.21 mmol) in dry CH<sub>2</sub>Cl<sub>2</sub> (80 mL) was added dropwise. The mixture was stirred at -78 °C for 2 h, then Et<sub>3</sub>N (39.40 mL, 280.84 mmol) was added and the mixture was warmed to ambient temperature. The reaction mixture was stirred at the same temperature for 0.5 h. It was diluted with H<sub>2</sub>O (50 mL) and the aqueous layer was extracted with CH<sub>2</sub>Cl<sub>2</sub> (3 × 50 mL). The combined organic layer was washed with H<sub>2</sub>O, brine and dried over anhydrous Na<sub>2</sub>SO<sub>4</sub>. After filtered and concentrated in vacuo, the crude aldehyde was obtained. This compound could be directly used in next steps without further purification.

To a stirred solution of diethyl allylphosphonate **19**<sup>2</sup> (18.76 g, 105.32 mmol) in dry THF (200 mL) at -78 °C was added n-BuLi (42.13 mL, 2.5 M in hexane, 105.32 mmol) dropwise under argon atmosphere. After stirring for 1 h, a solution of the crude aldehyde produced above in THF (80 mL) was added dropwise. After stirring at -78 °C for 0.5 h, the resulting solution was allowed to warm to ambient temperature and stirred for 12 h. The reaction was quenched with 6 N HCl (50 mL) at ambient

temperature. After stirring for 4 h at the same temperature, careful neutralization with sodium hydroxide aqueous solution. The resulting mixture was extracted with ether for 3 times. The combined organic layer was washed with H<sub>2</sub>O, brine, dried over anhydrous Na<sub>2</sub>SO<sub>4</sub> and concentrated in vacuo. The resulting residue was purified by silica gel chromatography (petroleum ether/EtOAc = 5:1) to afford the desired product **21** (9.57 g, 56.87 mmol, 81% overall yield for two steps) as a colorless oil.

Data for **21**

**<sup>1</sup>H NMR** (400 MHz, CDCl<sub>3</sub>): δ 6.32 (dt, *J* = 17.0, 10.2 Hz, 1H), 5.96 (dd, *J* = 15.6, 10.3 Hz, 1H), 5.66 (d, *J* = 15.6 Hz, 1H), 5.11 (d, *J* = 17.0 Hz, 1H), 5.00 – 4.95 (m, 1H), 3.63 (t, *J* = 6.6 Hz, 2H), 1.56 – 1.49 (m, 3H), 1.35 – 1.24 (m, 4H), 1.01 (s, 6H).

**<sup>13</sup>C NMR** (100 MHz, CDCl<sub>3</sub>): δ 145.08, 137.69, 126.99, 114.76, 62.96, 42.93, 36.03, 33.49, 27.04, 20.90.

**HRMS (ESI)**: calcd for C<sub>11</sub>H<sub>20</sub>O ([M + H]<sup>+</sup>) 169.1587, found 169.1590.

**IR** (neat) *v*<sub>max</sub>: 3355.1, 3087.0, 3033.0, 2957.9, 2935.8, 2865.1, 1648.3, 1602.6, 1464.7, 1460.0, 1384.0, 1363.4, 1252.0, 1053.2, 1005.3, 895.6, 776.9 cm<sup>-1</sup>.

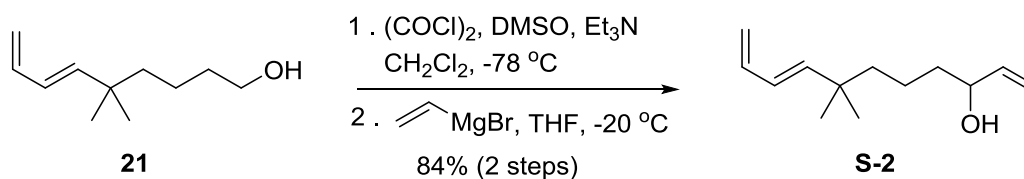

**(E)-7,7-Dimethylundeca-1,8,10-trien-3-ol (S-2)**: To a solution of oxalyl chloride (7.33 mL, 85.31 mmol) in anhyd CH<sub>2</sub>Cl<sub>2</sub> (120 mL) at -78 °C was added a solution of DMSO (12.10 mL, 170.61 mmol) in dry CH<sub>2</sub>Cl<sub>2</sub> (40 mL). After stirring for 30 min at -78 °C, a solution of **21** (9.57 g, 56.87 mmol) in anhyd CH<sub>2</sub>Cl<sub>2</sub> (40 mL) was added dropwise. The mixture was stirred at -78 °C for 2 h, then Et<sub>3</sub>N (31.91 mL, 227.48 mmol) was added and the mixture was warmed to ambient temperature. The mixture was stirred for 0.5 h at the same temperature and diluted with H<sub>2</sub>O (50 mL). The aqueous layer was extracted with CH<sub>2</sub>Cl<sub>2</sub> (3 × 50 mL) and the combined organic layer was washed with H<sub>2</sub>O, brine and dried over anhydrous Na<sub>2</sub>SO<sub>4</sub>. After filtered and concentrated in vacuo, the crude aldehyde was obtained. This compound can be directly used in next steps without further purification.

To a solution of the above crude aldehyde in dry THF (100 mL) at -20 °C was added vinylmagnesium bromide (1.0 M solution in anhyd THF, 85.31 mL, 85.31 mmol). The mixture was allowed to warm up to ambient temperature and stirred for 4 h. After which time TLC analysis showed

full conversion, the reaction was quenched with 50 mL saturated aqueous  $\text{NH}_4\text{Cl}$ . The aqueous layer was extracted with  $\text{Et}_2\text{O}$  ( $3 \times 50$  mL). The combined organic layers were washed with brine, dried ( $\text{Na}_2\text{SO}_4$ ), and concentrated in vacuo to give **S-2** (9.28 g, 47.77 mmol, 84% overall yield for two steps) as a colorless oil.

Data for **S-2**

**$^1\text{H}$  NMR** (400 MHz,  $\text{CDCl}_3$ ):  $\delta$  6.31 (dt,  $J = 17.0, 10.2$  Hz, 1H), 5.99 – 5.93 (m, 1H), 5.85 – 5.81 (m, 1H), 5.65 (d,  $J = 15.6$  Hz, 1H), 5.21 (dt,  $J = 17.2, 1.3$  Hz, 1H), 5.10 – 5.08 (m, 2H), 4.98 – 4.95 (m, 1H), 4.08 (dd,  $J = 12.9, 6.2$  Hz, 1H), 1.87 (br s, 1H), 1.50 – 1.46 (m, 2H), 1.32 – 1.27 (m, 4H), 1.01 (s, 6H).

**$^{13}\text{C}$  NMR** (100 MHz,  $\text{CDCl}_3$ ):  $\delta$  145.04, 141.25, 137.69, 126.95, 114.69, 114.46, 73.08, 42.97, 37.69, 36.02, 27.03, 20.45.

**HRMS (ESI)**: calcd for  $\text{C}_{13}\text{H}_{22}\text{O}$  ( $[\text{M} + \text{H}]^+$ ) 195.1743, found 195.1747.

**IR** (neat)  $\nu_{\text{max}}$ : 3356.0, 3084.8, 3034.9, 3016.7, 2958.9, 2939.2, 2867.1, 1647.7, 1602.6, 1460.6, 1423.7, 1383.5, 1362.9, 1285.2, 1202.1, 1109.7, 1066.8, 1004.7, 953.5, 920.6, 895.8, 658.9  $\text{cm}^{-1}$ .

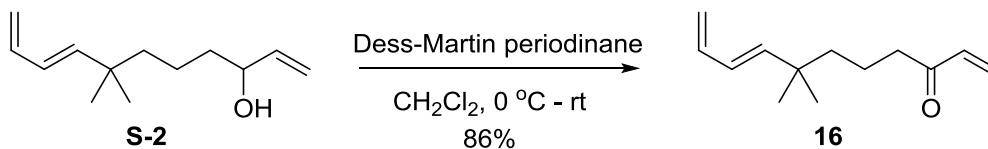

**(E)-7,7-Dimethylundeca-1,8,10-trien-3-one (16)**: To a solution of **S-2** (9.28 g, 47.77 mmol) in dry  $\text{CH}_2\text{Cl}_2$  (150 mL) at  $0^\circ\text{C}$  was added Dess-Martin periodinane (24.31 g, 57.32 mmol) successively. The mixture was stirred for 4 h at ambient temperature. After which time TLC analysis showed full conversion, the reaction was quenched with a mixture of aq sat.  $\text{NaHCO}_3$  and aq sat.  $\text{Na}_2\text{S}_2\text{O}_3$  (1:1, 100 mL). The mixture was stirred for 30 min at ambient temperature. The aqueous layer was extracted with  $\text{CH}_2\text{Cl}_2$  ( $3 \times 50$  mL). The combined organic layers were washed with  $\text{H}_2\text{O}$  and brine, dried ( $\text{Na}_2\text{SO}_4$ ), and concentrated in vacuo. The residue was purified by chromatography on silica gel (petroleum ether/ethyl acetate = 25:1) to give **16** (7.87 g, 40.95 mmol, 86% yield) as a colorless oil.

Data for **16**

**$^1\text{H}$  NMR** (400 MHz,  $\text{CDCl}_3$ ):  $\delta$  6.35 – 6.28 (m, 2H), 6.19 (d,  $J = 17.1$  Hz, 1H), 5.97 (dd,  $J = 15.6, 10.3$  Hz, 1H), 5.80 (dd,  $J = 10.5, 0.7$  Hz, 1H), 5.64 (d,  $J = 15.6$  Hz, 1H), 5.11 (d,  $J = 17.0$  Hz, 1H), 4.96 (d,  $J = 10.1$  Hz, 1H), 2.54 (t,  $J = 7.3$  Hz, 2H), 1.59 – 1.51 (m, 2H), 1.32 – 1.28 (m, 2H), 1.02 (s, 6H).

**$^{13}\text{C}$  NMR** (100 MHz,  $\text{CDCl}_3$ ):  $\delta$  200.58, 144.54, 137.52, 136.44, 127.70, 127.13, 114.79, 42.43, 40.07,

35.93, 26.91, 19.15.

**HRMS (ESI):** calcd for C<sub>13</sub>H<sub>20</sub>O ([M + H]<sup>+</sup>) 193.1587, found 193.1590.

**IR** (neat)  $\nu_{\text{max}}$ : 3388.4, 3085.9, 3034.9, 3019.2, 2959.5, 2869.1, 2370.9, 1701.5, 1683.3, 1648.1, 1616.2, 1603.0, 1459.7, 1451.7, 1401.8, 1384.3, 1362.9, 1262.0, 1199.9, 1092.4, 1006.1, 959.6, 897.0, 656.7 cm<sup>-1</sup>.

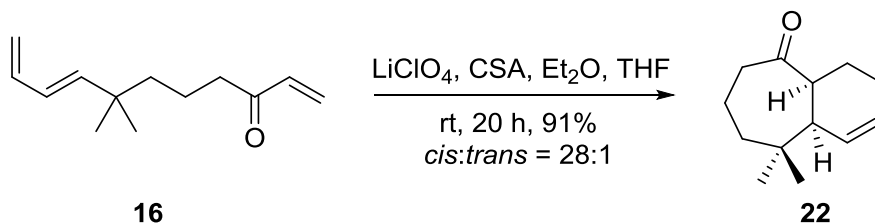

**9,9-Dimethyl-3,4,4a,6,7,8,9,9a-octahydro-5H-benzo[7]annulen-5-one (22):** To a solution of LiClO<sub>4</sub> (26.5 g, 250 mmol) in dry Et<sub>2</sub>O (40 mL) and camphorsulfonic acid (104 mg, 0.45 mmol) in dry THF (1 mL), a solution of the above **16** (4.31 g, 22.42 mmol) in dry Et<sub>2</sub>O (9 mL) was added dropwise. The mixture was stirred at ambient temperature for 20 h. It was cooled to 0 °C, and diluted with H<sub>2</sub>O. The filtrate was extracted with Et<sub>2</sub>O (3 × 100 mL). The combined organic layers were washed with water and brine, dried (Na<sub>2</sub>SO<sub>4</sub>), and concentrated in vacuo. The residue was purified by chromatography on silica gel (petroleum ether/ethyl acetate = 100:1) to give **22** (3.92 g, 20.40 mmol, *cis/trans* = 28/1, inseparable, 91% yield) as a colorless oil.

Data for **22**

**<sup>1</sup>H NMR** (400 MHz, CDCl<sub>3</sub>):  $\delta$  5.89 – 5.80 (m, 2H), 2.77 – 2.75 (m, 1H), 2.65 (td, *J* = 12.9, 2.6 Hz, 1H), 2.41 – 2.37 (m, 1H), 2.26 (s, 1H), 2.09 – 1.96 (m, 2H), 1.93 – 1.82 (m, 2H), 1.76 – 1.65 (m, 2H), 1.54 – 1.43 (m, 1H), 1.35 – 1.32 (m, 1H), 1.07 (s, 3H), 0.90 (s, 3H).

**<sup>13</sup>C NMR** (100 MHz, CDCl<sub>3</sub>):  $\delta$  217.93, 128.16, 127.56, 48.38, 44.94, 44.55, 38.22, 36.44, 31.00, 28.41, 25.18, 22.26, 21.70.

**HRMS (ESI):** calcd for C<sub>13</sub>H<sub>20</sub>O ([M + H]<sup>+</sup>) 193.1587, found 193.1592.

**IR** (neat)  $\nu_{\text{max}}$ : 3365.8, 3027.3, 2957.4, 2927.2, 2867.3, 2841.0, 2369.0, 2346.3, 1691.8, 1474.6, 1452.6, 1438.4, 1386.9, 1366.4, 1322.0, 1291.3, 1253.1, 1204.5, 1168.4, 1133.9, 1116.0, 1018.9, 645.0, 639.7 cm<sup>-1</sup>.

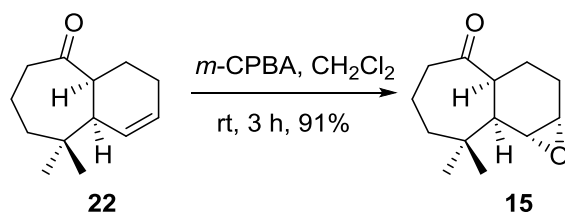

**8,8-Dimethyldecahydro-4H-cyclohepta[3,4]benzo[1,2-b]oxiren-4-one (15):** To a solution of **22** (1.85 g, 9.60 mmol) in  $\text{CH}_2\text{Cl}_2$  (100 mL) was added *m*-CPBA (85%, 2.34 g, 11.52 mmol) at room temperature and the mixture was stirred for 3 h. After which time TLC analysis showed full conversion, the reaction was quenched with saturated  $\text{NaHCO}_3$  and the aqueous layer was extracted with  $\text{CH}_2\text{Cl}_2$  ( $3 \times 50$  mL). The combined organic layers were washed with water and brine, dried ( $\text{Na}_2\text{SO}_4$ ), and concentrated in vacuo. The residual was purified by flash chromatography (petroleum ether/ethyl acetate = 10:1) to give **15** (1.82 g, 8.74 mmol, 91% yield) as a clear crystal. M.p. 84–86 °C.

Data for **15**

**$^1\text{H}$  NMR** (400 MHz,  $\text{CDCl}_3$ ):  $\delta$  3.23 – 3.20 (m, 2H), 2.49 – 2.34 (m, 3H), 1.96 – 1.93 (m, 1H), 1.74 – 1.68 (m, 3H), 1.64 – 1.54 (m, 3H), 1.42 (t,  $J = 15.4$  Hz, 2H), 1.14 (s, 3H), 0.84 (s, 3H).

**$^{13}\text{C}$  NMR** (100 MHz,  $\text{CDCl}_3$ ):  $\delta$  216.56, 53.15, 52.22, 45.44, 45.14, 44.67, 38.48, 35.86, 31.29, 24.95, 24.54, 21.27, 20.68.

**HRMS (ESI):** calcd for  $\text{C}_{13}\text{H}_{20}\text{O}_2$  ( $[\text{M} + \text{H}]^+$ ) 209.1536, found 209.1541.

**IR** (neat)  $\nu_{\text{max}}$ : 3368.6, 2956.2, 2930.7, 2869.2, 2371.7, 2346.4, 1693.2, 1450.7, 1440.3, 1367.8, 1318.3, 1260.2, 1180.3, 1121.0, 869.5, 810.3, 779.8  $\text{cm}^{-1}$ .

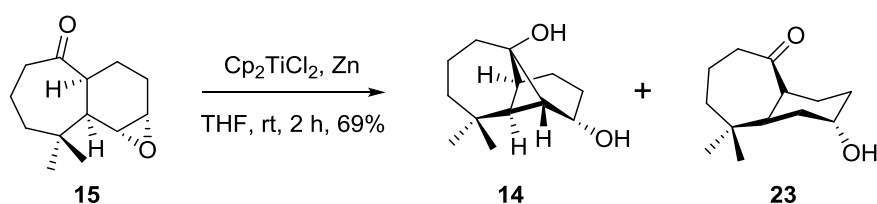

**6,6-Dimethyltricyclo[5.4.0.0<sup>2,8</sup>]undecane-2,9-diol (14):** A mixture of  $\text{Cp}_2\text{TiCl}_2$  (3.05 g, 12.25 mmol) and activated Zn powder (1.28 g, 19.60 mmol) in strictly deoxygenated THF (100 mL) was stirred at room temperature until the red solution turned green. To the solution of  $\text{Cp}_2\text{TiCl}_2$  was slowly added epoxide **15** (1.02 g, 4.90 mmol) in strictly deoxygenated THF (30 mL). The reaction was stirred for 1.5 h, the mixture was then added  $\text{H}_2\text{O}$  and ethyl ether (1:100, 100mL) and stirred for 3 h. The mixture filtered and the filtrate was evaporated under reduced pressure. The residue was purified through neutral alumina chromatography (dichloromethane/methanol, 3:1) to give **14** (712 mg, 3.39 mmol, 69%



yield) as a clear crystal (M.p. 144–146 °C) and **23** (0.29 g, 1.37 mmol, 28% yield) as a colorless oil.

Data for **14**

**<sup>1</sup>H NMR** (400 MHz, MeOD):  $\delta$  4.32 (ddd,  $J$  = 8.4, 5.9, 2.6 Hz, 1H), 2.25 – 2.22 (m, 1H), 2.15 (t,  $J$  = 4.5 Hz, 1H), 2.10 – 2.01 (m, 1H), 1.99 – 1.90 (m, 1H), 1.83 – 1.67 (m, 3H), 1.64 – 1.61 (m, 1H), 1.61 – 1.55 (m, 2H), 1.51 – 1.42 (m, 1H), 1.38 – 1.35 (m, 2H), 0.91 (s, 3H), 0.90 (s, 3H).

**<sup>13</sup>C NMR** (100 MHz, MeOD):  $\delta$  75.30, 71.52, 50.37, 43.94, 42.98, 41.68, 39.86, 32.76, 28.69, 28.36, 26.62, 24.97, 21.11.

**HRMS (ESI)**: calcd for C<sub>13</sub>H<sub>22</sub>O<sub>2</sub> ([M + H]<sup>+</sup>) 211.1693, found 211.1694.

**IR** (neat)  $\nu_{\text{max}}$ : 3402.7, 2928.8, 2865.8, 2368.6, 1740.9, 1726.3, 1689.7, 1459.1, 1373.8, 1242.4, 1117.3, 1046.6, 1007.8, 957.6 cm<sup>-1</sup>.

Data for **23**

**<sup>1</sup>H NMR** (400 MHz, CDCl<sub>3</sub>):  $\delta$  4.21 – 4.16 (m, 1H), 2.77 – 2.76 (m, 1H), 2.64 (ddd,  $J$  = 15.3, 6.3, 2.8 Hz, 1H), 2.44 – 2.37 (m, 1H), 2.12 – 2.03 (m, 1H), 1.99 (dt,  $J$  = 13.1, 3.4 Hz, 1H), 1.92 – 1.78 (m, 3H), 1.70 – 1.64 (m, 3H), 1.62 – 1.51 (m, 3H), 1.43 (dt,  $J$  = 14.1, 4.1 Hz, 1H), 1.04 (s, 3H), 0.99 (s, 3H).

**<sup>13</sup>C NMR** (100 MHz, CDCl<sub>3</sub>):  $\delta$  216.76, 66.06, 48.26, 45.83, 40.89, 38.11, 35.71, 31.40, 30.90, 29.32, 26.61, 24.68, 19.68.

**HRMS (ESI)**: calcd for C<sub>13</sub>H<sub>22</sub>O<sub>2</sub> ([M + H]<sup>+</sup>) 211.1693, found 211.1689.

**IR** (neat)  $\nu_{\text{max}}$ : 3430.7, 2936.3, 2869.4, 2371.0, 1685.2, 1450.3, 1367.4, 1235.0, 1198.7, 1122.7, 1062.0, 972.3 cm<sup>-1</sup>.

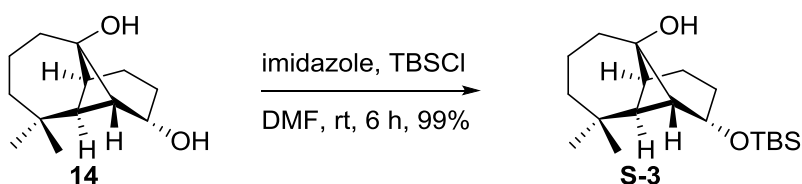

**9-((*tert*-Butyldimethylsilyl)oxy)-6,6-dimethyltricyclo[5.4.0.0<sup>2,8</sup>]undecan-2-ol (S-3)**: To a stirred solution of alcohol **14** (597 mg, 2.84 mmol) in DMF (15 mL) at room temperature was added imidazole (290 mg, 4.26 mmol) and TBSCl (557 mg, 3.69 mmol). The resulting solution was stirred at the same temperature for 6 h, when TLC analysis of the crude mixture showed full conversion. The solution was poured into 200 mL of ethyl acetate, and then washed with water (20 mL×3). The organic layer was washed with brine and dried over anhydrous Na<sub>2</sub>SO<sub>4</sub>, concentrated in vacuo. The residue was purified through silica chromatography (petroleum ether/ethyl acetate, 50:1) to give **S-3** (914 mg, 2.82 mmol,

nearly quant.) as colorless oil.

#### Data for **S-3**

**<sup>1</sup>H NMR** (400 MHz, CDCl<sub>3</sub>): δ 4.37 – 4.32 (m, 1H), 2.16 (s, 2H), 2.02 (dtd, *J* = 14.4, 8.6, 2.7 Hz, 1H), 1.90 – 1.76 (m, 3H), 1.72 – 1.67 (m, 1H), 1.64 (s, 1H), 1.60 – 1.48 (m, 3H), 1.35 – 1.32 (m, 2H), 1.22 (s, 1H), 0.90 (s, 3H), 0.87 (s, 9H), 0.86 (s, 3H), 0.03 (s, 3H), 0.02 (s, 3H).

**<sup>13</sup>C NMR** (100 MHz, CDCl<sub>3</sub>): δ 74.84, 71.09, 50.12, 42.76, 41.77, 41.08, 38.53, 31.84, 27.93, 26.99, 25.85, 24.11, 20.03, 17.98, -4.52, -4.68.

**HRMS (ESI)**: calcd for C<sub>19</sub>H<sub>36</sub>O<sub>2</sub>Si ([M + H]<sup>+</sup>) 325.2557, found 325.2560.

**IR** (neat) *v*<sub>max</sub>: 3423.3, 2953.0, 2928.4, 2856.3, 2370.9, 1460.8, 1363.2, 1254.2, 1115.4, 1077.2, 1067.7, 1036.5, 1005.2, 970.1, 905.6, 858.1, 836.0, 773.5 cm<sup>-1</sup>.

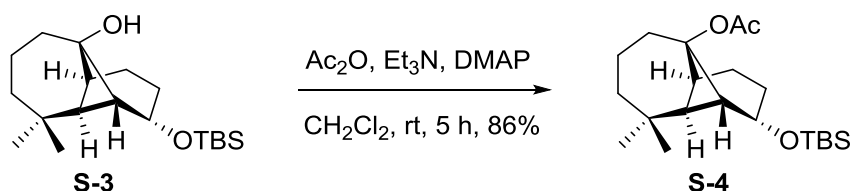

**9-((*tert*-Butyldimethylsilyl)oxy)-6,6-dimethyltricyclo[5.4.0.0<sup>2,8</sup>]undecan-2-yl acetate (**S-4**):** To a stirred solution of **S-3** (914 mg, 2.82 mmol) and DMAP (172 mg, 1.41 mmol) in CH<sub>2</sub>Cl<sub>2</sub> (30 mL) was added acetic anhydride (533 μL, 5.64 mmol) followed by triethylamine (1.12 mL, 8.46 mmol) at 0 °C. The resulting solution was stirred at room temperature for 5 h, when TLC analysis of the crude mixture showed full conversion. The reaction was quenched with saturated aqueous NH<sub>4</sub>Cl and extracted with CH<sub>2</sub>Cl<sub>2</sub> (3 × 50 mL). The combined organic layers were washed with water and brine, dried with anhydrous sodium sulfate and concentrated in vacuo. The residue was purified through silica chromatography (petroleum ether/ethyl acetate = 80:1) to give **S-4** (889 mg, 2.43 mmol, 86% yield) as colorless oil.

#### Data for **S-4**

**<sup>1</sup>H NMR** (400 MHz, CDCl<sub>3</sub>): δ 4.25 – 4.16 (m, 1H), 2.46 (s, 1H), 2.41 – 2.35 (m, 1H), 2.06 – 1.88 (m, 6H), 1.85 – 1.79 (m, 1H), 1.73 – 1.64 (m, 2H), 1.56 – 1.48 (m, 3H), 1.35 (s, 1H), 1.32 (s, 1H), 0.88 (s, 3H), 0.85 (s, 9H), 0.84 (s, 3H), 0.00 (s, 3H), -0.00 (s, 3H).

**<sup>13</sup>C NMR** (100 MHz, CDCl<sub>3</sub>): δ 169.92, 83.12, 71.00, 49.52, 44.55, 41.73, 38.78, 35.53, 31.72, 27.97, 27.84, 27.07, 25.83, 25.34, 21.59, 19.82, 17.99, -4.70, -4.74.

**HRMS (ESI)**: calcd for C<sub>21</sub>H<sub>38</sub>O<sub>3</sub>Si ([M + Na]<sup>+</sup>) 389.2482, found 389.2492.



After which time TLC analysis showed full conversion, the mixture was then filtered and the filtrate was evaporated under reduced pressure. The residue was purified by column chromatography (petroleum ether/ethyl acetate, 50:1) to give the ketone **25** (585 mg, 2.34 mmol, 97% yield) as a clear crystal. M.p. 70–72 °C.

Data for **25**

**<sup>1</sup>H NMR** (400 MHz, CDCl<sub>3</sub>): δ 3.08 (d, *J* = 5.1 Hz, 1H), 2.86 (s, 1H), 2.52 – 2.43 (m, 1H), 2.32 – 2.21 (m, 2H), 2.15 – 1.74 (m, 6H), 1.67 – 1.49 (m, 3H), 1.38 (dt, *J* = 23.4, 13.9 Hz, 2H), 0.88 (s, 3H), 0.83 (s, 3H).

**<sup>13</sup>C NMR** (100 MHz, CDCl<sub>3</sub>): δ 210.75, 169.20, 81.72, 58.67, 46.93, 41.66, 38.24, 34.96, 32.57, 32.33, 27.56, 27.37, 22.03, 21.27, 19.28.

**HRMS (ESI)**: calcd for C<sub>15</sub>H<sub>22</sub>O<sub>3</sub> ([M + Na]<sup>+</sup>) 273.1461, found 273.1464.

**IR** (neat) *ν*<sub>max</sub>: 3414.9, 2954.9, 2868.7, 1734.5, 1717.7, 1465.5, 1368.6, 1233.6, 1088.9, 1067.5, 1011.0, 983.7 cm<sup>-1</sup>.

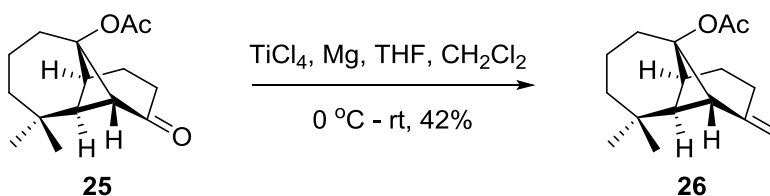

**6,6-Dimethyl-9-methylenetricyclo[5.4.0.0<sup>2,8</sup>]undecan-2-yl acetate (26)**: To a 0 °C suspension consisting of Mg (156 mg, 6.48 mmol), TiCl<sub>4</sub> (1.62 mL, 1.0 M in methylene chloride, 1.62 mmol), and CH<sub>2</sub>Cl<sub>2</sub> (4 mL) was added over a 2-min period a solution of ketone **25** (203 mg, 0.81 mmol) in CH<sub>2</sub>Cl<sub>2</sub> (3 mL) and THF (2 mL). After being stirred for 30 min at 0 °C, the resulting green-black mixture was stirred for an additional 20 min at room temperature. The reaction mixture was recooled to 0 °C. Saturated potassium carbonate solution (10 mL) was added and the mixture was diluted with ether (20 mL). The organic layer was separated, dried, evaporated, and purified by chromatography on silica chromatography (petroleum ether/ethyl acetate = 80:1) to give **26** (84 mg, 0.34 mmol, 42% yield) as colorless oil.

Data for **26**

**<sup>1</sup>H NMR** (400 MHz, CDCl<sub>3</sub>): δ 4.66 – 4.61 (m, 2H), 3.12 (d, *J* = 5.7 Hz, 1H), 2.58 – 2.54 (m, 1H), 2.53 – 2.45 (m, 1H), 2.36 – 2.28 (m, 1H), 2.25 – 2.18 (m, 1H), 2.06 – 1.98 (m, 1H), 1.94 (s, 3H), 1.88 – 1.78 (m, 1H), 1.68 – 1.55 (m, 3H), 1.49 (s, 1H), 1.41 – 1.39 (m, 2H), 0.90 (d, *J* = 3.1 Hz, 6H).

**$^{13}\text{C}$  NMR** (100 MHz,  $\text{CDCl}_3$ ):  $\delta$  169.36, 151.11, 107.64, 82.95, 52.71, 50.26, 41.56, 38.74, 35.15, 32.31, 28.05, 27.83, 25.38, 23.36, 21.77, 19.70.

**HRMS (ESI)**: calcd for  $\text{C}_{16}\text{H}_{24}\text{O}_2$  ( $[\text{M} + \text{Na}]^+$ ) 271.1669, found 271.1675.

**IR** (neat)  $\nu_{\text{max}}$ : 3448.2, 3073.6, 2952.2, 2904.4, 2867.3, 1735.5, 1644.3, 1458.1, 1366.1, 1248.1, 1234.5, 1090.7, 1072.1, 1009.8, 878.8, 738.0  $\text{cm}^{-1}$ .

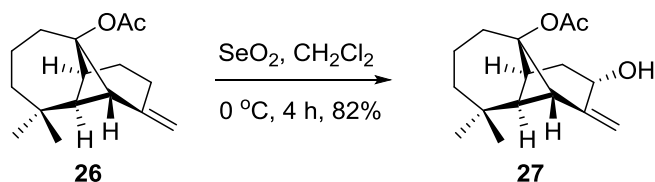

**10-Hydroxy-6,6-dimethyl-9-methylenetricyclo[5.4.0.0<sup>2,8</sup>]undecan-2-yl acetate (27)**: To a solution of **26** (30 mg, 0.12 mmol) in  $\text{CH}_2\text{Cl}_2$  (10 mL) and  $\text{H}_2\text{O}$  (0.1 mL) at 0 °C was added  $\text{SeO}_2$  (53 mg, 0.48 mmol) portionwise. The resulting solution was stirred at the same temperature for 4 h, after which time TLC analysis showed full conversion, the reaction quenched by addition of brine, the water phase was extracted with 50 mL  $\text{CH}_2\text{Cl}_2$ . The combined organic phase was dried over  $\text{Na}_2\text{SO}_4$  and concentrated in vacuo. The residue was chromatographed on silica-gel column with petroleum/EtOAc (50:1) to afford **27** (26 mg, 0.10 mmol, 82% yield) as colorless oil.

Data for **27**

**$^1\text{H}$  NMR** (400 MHz,  $\text{CDCl}_3$ ):  $\delta$  5.05 (s, 1H), 4.92 (s, 1H), 4.47 (d,  $J = 7.8$  Hz, 1H), 3.19 (d,  $J = 5.9$  Hz, 1H), 2.62 – 2.57 (m, 1H), 2.55 – 2.47 (m, 1H), 2.24 – 2.18 (m, 1H), 1.98 – 1.93 (m, 1H), 1.92 (s, 3H), 1.80 (dt,  $J = 14.1$  Hz, 1H), 1.71 (s, 1H), 1.66 (s, 1H), 1.65 – 1.58 (m, 2H), 1.42 – 1.39 (m, 2H), 0.91 (s, 6H).

**$^{13}\text{C}$  NMR** (100 MHz,  $\text{CDCl}_3$ ):  $\delta$  169.24, 155.68, 111.21, 82.49, 66.67, 51.87, 51.39, 41.37, 38.61, 37.57, 34.82, 32.35, 27.94, 27.69, 21.68, 19.66.

**HRMS (ESI)**: calcd for  $\text{C}_{16}\text{H}_{24}\text{O}_3$  ( $[\text{M} + \text{Na}]^+$ ) 287.1618, found 287.1622.

**IR** (neat)  $\nu_{\text{max}}$ : 3390.4, 2955.6, 2922.0, 2850.4, 2372.9, 2346.1, 1735.3, 1726.3, 1459.8, 1260.0, 1232.1, 1114.7, 1072.6, 1027.2, 788.2, 739.7  $\text{cm}^{-1}$ .

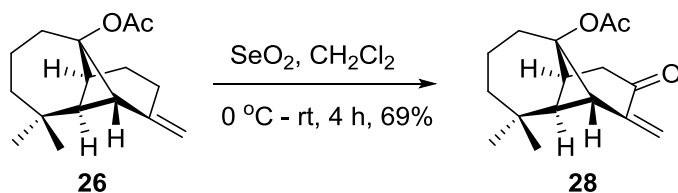

**6, 6-Dimethyl-9-methylene-10-oxotricyclo[5.4.0.0<sup>2,8</sup>]undecan-2-yl acetate (28)**: To a solution of **26**

(32 mg, 0.13 mmol) in CH<sub>2</sub>Cl<sub>2</sub> (10 mL) at 0 °C was added SeO<sub>2</sub> (57 mg, 0.52 mmol) portionwise. The resulting solution was stirred at room temperature for 4 h, after which time TLC analysis showed full conversion, the reaction quenched by addition of brine the water phase was extracted with 150 mL CH<sub>2</sub>Cl<sub>2</sub>. The combined organic phase was dried over Na<sub>2</sub>SO<sub>4</sub> and concentrated in vacuo. The residue was chromatographed on silica-gel column with petroleum/EtOAc (70:1) to afford **28** (24 mg, 0.09 mmol, 69% yield) as a clear crystal. M.p. 86–88 °C.

Data for **28**

**<sup>1</sup>H NMR** (400 MHz, CDCl<sub>3</sub>): δ 5.96 (d, *J* = 1.4 Hz, 1H), 5.09 (d, *J* = 1.3 Hz, 1H), 3.43 (d, *J* = 6.6 Hz, 1H), 2.82 – 2.72 (m, 2H), 2.56 – 2.45 (m, 1H), 2.35 – 2.27 (m, 1H), 2.01 – 1.92 (m, 1H), 1.86 (s, 3H), 1.70 – 1.63 (m, 2H), 1.51 (s, 1H), 1.47 (dd, *J* = 10.1, 3.6 Hz, 2H), 0.94 (s, 6H).

**<sup>13</sup>C NMR** (100 MHz, CDCl<sub>3</sub>): δ 198.35, 169.33, 147.56, 118.48, 81.93, 54.73, 49.35, 43.12, 39.69, 38.56, 34.49, 32.66, 27.74, 27.52, 21.27, 19.38.

**HRMS (ESI)**: calcd for C<sub>16</sub>H<sub>22</sub>O<sub>3</sub> ([M + Na]<sup>+</sup>) 285.1461, found 285.1466.

**IR** (neat) *v*<sub>max</sub>: 3404.5, 2954.5, 2869.0, 1738.2, 1709.9, 1630.9, 1466.7, 1457.9, 1369.3, 1286.9, 1231.8, 1109.2, 1087.5, 1054.1, 937.1 cm<sup>-1</sup>.

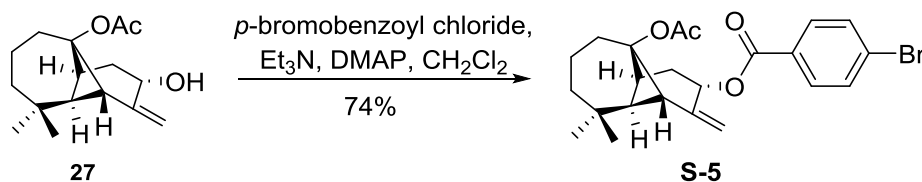

**2-Acetoxy-6,6-dimethyl-9-methylenetricyclo[5.4.0.0<sup>2,8</sup>]undecan-10-yl 4-bromobenzoate (S-5)**: To a stirred solution of **27** (80 mg, 0.3 mmol) and DMAP (37 mg, 0.3 mmol) in CH<sub>2</sub>Cl<sub>2</sub> (10 mL) was added *p*-bromobenzoyl chloride (132 mg, 0.6 mmol) followed by triethylamine (126 μL, 0.9 mmol) at 0 °C. The resulting solution was stirred at room temperature for 3 h, when TLC analysis of the crude mixture showed full conversion. The reaction was quenched with saturated aqueous NH<sub>4</sub>Cl and extracted with CH<sub>2</sub>Cl<sub>2</sub> (3 × 10 mL). The combined organic layers were washed with water and brine, dried with anhydrous sodium sulfate and concentrated in vacuo. The residue was purified through silica chromatography (petroleum ether/ethyl acetate = 100:1) to give **S-5** (99 mg, 0.22 mmol, 74% yield) as colorless oil.

Data for **S-5**

**<sup>1</sup>H NMR** (400 MHz, CDCl<sub>3</sub>): δ 7.91 (d, *J* = 8.5 Hz, 2H), 7.59 (d, *J* = 8.5 Hz, 2H), 5.79 (d, *J* = 7.7 Hz,



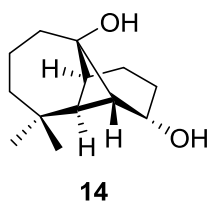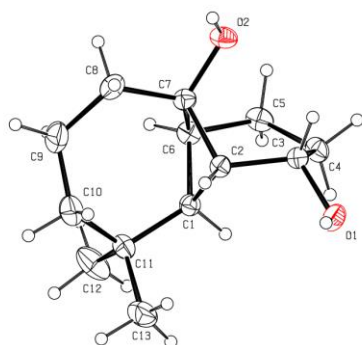

**Figure S1**

**Figure S1:** X-ray crystallographic structure of compound **14** (CCDC 1847732).

*Crystal data and structure refinement for compound 14*

|                       |                                                |
|-----------------------|------------------------------------------------|
| Identification code   | hem_052                                        |
| Empirical formula     | C <sub>13</sub> H <sub>22</sub> O <sub>2</sub> |
| Formula weight        | 210.31                                         |
| Temperature/K         | 295.38(10)                                     |
| Crystal system        | orthorhombic                                   |
| Space group           | Pbca                                           |
| a/Å                   | 11.8513(6)                                     |
| b/Å                   | 8.0917(4)                                      |
| c/Å                   | 24.6768(12)                                    |
| $\alpha$ /°           | 90.00                                          |
| $\beta$ /°            | 90.00                                          |
| $\gamma$ /°           | 90.00                                          |
| Volume/Å <sup>3</sup> | 2366.4(2)                                      |



|                                                       |                                                                  |
|-------------------------------------------------------|------------------------------------------------------------------|
| Z                                                     | 8                                                                |
| $\rho_{\text{calc}}/\text{cm}^3$                      | 1.181                                                            |
| $\mu/\text{mm}^{-1}$                                  | 0.077                                                            |
| F(000)                                                | 928.0                                                            |
| Crystal size/ $\text{mm}^3$                           | $0.17 \times 0.14 \times 0.12$                                   |
| Radiation                                             | MoK $\alpha$ ( $\lambda = 0.71073$ )                             |
| $2\Theta$ range for data collection/ $^\circ$         | 7.44 to 52.04                                                    |
| Index ranges                                          | $-6 \leq h \leq 14, -9 \leq k \leq 8, -30 \leq l \leq 14$        |
| Reflections collected                                 | 5202                                                             |
| Independent reflections                               | 2321 [ $R_{\text{int}} = 0.0362$ , $R_{\text{sigma}} = 0.0567$ ] |
| Data/restraints/parameters                            | 2321/0/140                                                       |
| Goodness-of-fit on $F^2$                              | 1.066                                                            |
| Final R indexes [ $I \geq 2\sigma(I)$ ]               | $R_1 = 0.0642$ , $wR_2 = 0.1520$                                 |
| Final R indexes [all data]                            | $R_1 = 0.0908$ , $wR_2 = 0.1749$                                 |
| Largest diff. peak/hole / $\text{e } \text{\AA}^{-3}$ | 0.62/-0.24                                                       |

*Fractional Atomic Coordinates ( $\times 10^4$ ) and Equivalent Isotropic Displacement Parameters ( $\text{\AA}^2 \times 10^3$ )*

*for hem\_052.  $U_{\text{eq}}$  is defined as 1/3 of of the trace of the orthogonalised  $U_{ij}$  tensor.*

| Atom | x           | y        | z          | U (eq)  |
|------|-------------|----------|------------|---------|
| O1   | 1754.0(14)  | 1870(2)  | 2583.5(8)  | 43.4(5) |
| O2   | -1465.0(15) | 112(2)   | 2928.9(7)  | 39.2(5) |
| C1   | 616.6(19)   | 1570(3)  | 3761.0(9)  | 30.3(6) |
| C2   | 132.8(18)   | 2014(3)  | 3195.7(9)  | 28.3(5) |
| C3   | 740.0(19)   | 1041(3)  | 2755.4(9)  | 31.3(6) |
| C7   | -963.3(19)  | 1067(3)  | 3354.0(9)  | 31.2(6) |
| C11  | 543(2)      | 2864(3)  | 4215.0(10) | 39.5(6) |
| C6   | -204(2)     | 68(3)    | 3742.0(10) | 33.6(6) |
| C5   | 369(2)      | -1339(3) | 3432.5(10) | 38.6(6) |
| C4   | 1101(2)     | -663(3)  | 2964.1(10) | 37.7(6) |

|     |          |         |            |          |
|-----|----------|---------|------------|----------|
| C8  | -1878(2) | 2089(4) | 3628.3(11) | 42.8(7)  |
| C10 | -589(3)  | 3826(4) | 4214.0(13) | 59.4(9)  |
| C13 | 1455(3)  | 4170(4) | 4112.8(13) | 58.6(9)  |
| C9  | -1634(3) | 2840(5) | 4173.4(13) | 60.7(9)  |
| C12 | 760(3)   | 2045(4) | 4753.2(11) | 68.9(11) |

*Anisotropic Displacement Parameters ( $\text{\AA}^2 \times 10^3$ ) for hem\_052. The Anisotropic displacement factor exponent takes the form:  $-2\pi^2[h^2a^{*2}U_{11}+2hka^*b^*U_{12}+...]$ .*

| Atom | U11      | U22      | U33      | U23       | U13       | U12       |
|------|----------|----------|----------|-----------|-----------|-----------|
| O1   | 37.2(10) | 42.4(11) | 50.7(11) | 2.2(9)    | 12.5(8)   | 0.4(9)    |
| O2   | 36.5(10) | 34.2(10) | 47.0(10) | -1.9(8)   | -12.6(8)  | 0.2(8)    |
| C1   | 30.1(12) | 29.4(13) | 31.4(12) | -1.1(10)  | 0.2(10)   | 1.9(11)   |
| C2   | 29.8(11) | 22.8(11) | 32.4(11) | 2.0(10)   | 1.2(10)   | 2.7(10)   |
| C3   | 30.1(11) | 32.4(13) | 31.3(12) | -0.7(10)  | -0.2(10)  | -1.4(11)  |
| C7   | 29.4(12) | 29.7(13) | 34.6(12) | 1.6(10)   | -2.6(10)  | 1.1(11)   |
| C11  | 44.6(15) | 36.8(14) | 36.9(14) | -8.4(11)  | 0.8(12)   | 0.0(13)   |
| C6   | 38.7(13) | 29.7(13) | 32.4(12) | 4.8(11)   | -1.5(11)  | -1.0(11)  |
| C5   | 44.4(14) | 25.3(12) | 45.9(14) | 2.3(11)   | -10.7(12) | 3.1(12)   |
| C4   | 39.3(13) | 32.0(14) | 41.8(13) | -6.4(11)  | -6.2(12)  | 10.6(12)  |
| C8   | 31.7(13) | 48.3(17) | 48.4(15) | 1.3(13)   | 3.4(11)   | 2.3(13)   |
| C10  | 57.1(19) | 61(2)    | 60.5(19) | -22.4(16) | 6.1(15)   | 7.4(17)   |
| C13  | 68(2)    | 47.3(18) | 60.7(19) | -14.1(15) | 0.7(16)   | -16.5(17) |
| C9   | 46.4(16) | 77(2)    | 58.7(19) | -16.9(17) | 8.9(15)   | 13.5(17)  |
| C12  | 107(3)   | 62(2)    | 37.9(16) | -4.9(15)  | -17.1(18) | -6(2)     |

*Bond Lengths for hem\_052.*

| Atom | Atom | Length/ $\text{\AA}$ | Atom | Atom | Length/ $\text{\AA}$ |
|------|------|----------------------|------|------|----------------------|
| O1   | C3   | 1.440(3)             | C7   | C8   | 1.522(3)             |
| O2   | C7   | 1.432(3)             | C11  | C10  | 1.551(4)             |

|    |     |          |     |     |          |
|----|-----|----------|-----|-----|----------|
| C1 | C2  | 1.550(3) | C11 | C13 | 1.533(4) |
| C1 | C11 | 1.536(3) | C11 | C12 | 1.507(4) |
| C1 | C6  | 1.558(3) | C6  | C5  | 1.530(3) |
| C2 | C3  | 1.523(3) | C5  | C4  | 1.545(4) |
| C2 | C7  | 1.558(3) | C8  | C9  | 1.504(4) |
| C3 | C4  | 1.533(3) | C10 | C9  | 1.476(4) |
| C7 | C6  | 1.542(3) |     |     |          |

*Bond Angles for hem\_052.*

| Atom | Atom | Atom | Angle/°    | Atom | Atom | Atom | Angle/°    |
|------|------|------|------------|------|------|------|------------|
| C2   | C1   | C6   | 85.56(17)  | C1   | C11  | C10  | 113.0(2)   |
| C11  | C1   | C2   | 118.5(2)   | C13  | C11  | C1   | 108.0(2)   |
| C11  | C1   | C6   | 121.2(2)   | C13  | C11  | C10  | 105.3(2)   |
| C1   | C2   | C7   | 88.21(17)  | C12  | C11  | C1   | 109.4(2)   |
| C3   | C2   | C1   | 110.33(18) | C12  | C11  | C10  | 111.7(3)   |
| C3   | C2   | C7   | 108.56(18) | C12  | C11  | C13  | 109.2(2)   |
| O1   | C3   | C2   | 111.33(19) | C7   | C6   | C1   | 88.52(17)  |
| O1   | C3   | C4   | 106.54(19) | C5   | C6   | C1   | 108.5(2)   |
| C2   | C3   | C4   | 110.94(19) | C5   | C6   | C7   | 109.82(19) |
| O2   | C7   | C2   | 115.35(19) | C6   | C5   | C4   | 111.1(2)   |
| O2   | C7   | C6   | 114.47(19) | C3   | C4   | C5   | 114.4(2)   |
| O2   | C7   | C8   | 108.86(19) | C9   | C8   | C7   | 118.7(2)   |
| C6   | C7   | C2   | 85.82(17)  | C9   | C10  | C11  | 117.0(3)   |
| C8   | C7   | C2   | 115.9(2)   | C10  | C9   | C8   | 116.1(3)   |
| C8   | C7   | C6   | 115.1(2)   |      |      |      |            |

*Torsion Angles for hem\_052.*

| A  | B  | C  | D  | Angle/°    | A  | B  | C  | D  | Angle/°    |
|----|----|----|----|------------|----|----|----|----|------------|
| O1 | C3 | C4 | C5 | 147.5(2)   | C3 | C2 | C7 | C8 | -159.0(2)  |
| O2 | C7 | C6 | C1 | 141.61(19) | C7 | C2 | C3 | O1 | 178.96(18) |

|    |     |     |     |            |     |     |     |     |            |
|----|-----|-----|-----|------------|-----|-----|-----|-----|------------|
| O2 | C7  | C6  | C5  | 32.4(3)    | C7  | C2  | C3  | C4  | -62.6(2)   |
| O2 | C7  | C8  | C9  | 163.9(3)   | C7  | C6  | C5  | C4  | 59.6(3)    |
| C1 | C2  | C3  | O1  | -85.9(2)   | C7  | C8  | C9  | C10 | 52.0(4)    |
| C1 | C2  | C3  | C4  | 32.5(3)    | C11 | C1  | C2  | C3  | 153.0(2)   |
| C1 | C2  | C7  | O2  | -140.9(2)  | C11 | C1  | C2  | C7  | -97.9(2)   |
| C1 | C2  | C7  | C6  | -25.74(17) | C11 | C1  | C6  | C7  | 95.1(2)    |
| C1 | C2  | C7  | C8  | 90.2(2)    | C11 | C1  | C6  | C5  | -154.5(2)  |
| C1 | C11 | C10 | C9  | 48.1(4)    | C11 | C10 | C9  | C8  | -72.9(4)   |
| C1 | C6  | C5  | C4  | -35.7(3)   | C6  | C1  | C2  | C3  | -83.67(19) |
| C2 | C1  | C11 | C10 | 39.6(3)    | C6  | C1  | C2  | C7  | 25.48(16)  |
| C2 | C1  | C11 | C13 | -76.5(3)   | C6  | C1  | C11 | C10 | -63.5(3)   |
| C2 | C1  | C11 | C12 | 164.7(2)   | C6  | C1  | C11 | C13 | -179.6(2)  |
| C2 | C1  | C6  | C7  | -25.76(16) | C6  | C1  | C11 | C12 | 61.7(3)    |
| C2 | C1  | C6  | C5  | 84.68(19)  | C6  | C7  | C8  | C9  | 33.9(3)    |
| C2 | C3  | C4  | C5  | 26.1(3)    | C6  | C5  | C4  | C3  | -24.4(3)   |
| C2 | C7  | C6  | C1  | 25.61(16)  | C8  | C7  | C6  | C1  | -91.1(2)   |
| C2 | C7  | C6  | C5  | -83.6(2)   | C8  | C7  | C6  | C5  | 159.7(2)   |
| C2 | C7  | C8  | C9  | -64.0(3)   | C13 | C11 | C10 | C9  | 165.8(3)   |
| C3 | C2  | C7  | O2  | -30.0(3)   | C12 | C11 | C10 | C9  | -75.8(3)   |
| C3 | C2  | C7  | C6  | 85.12(19)  |     |     |     |     |            |

*Hydrogen Atom Coordinates ( $\text{\AA} \times 10^4$ ) and Isotropic Displacement Parameters ( $\text{\AA}^2 \times 10^3$ ) for hem\_052.*

| Atom | x     | y     | z    | U(eq) |
|------|-------|-------|------|-------|
| H1   | 1592  | 2775  | 2456 | 65    |
| H2   | -1962 | 656   | 2782 | 59    |
| H1A  | 1397  | 1185  | 3724 | 36    |
| H2A  | 38    | 3197  | 3124 | 34    |
| H3   | 236   | 903   | 2444 | 38    |
| H6   | -549  | -240  | 4089 | 40    |
| H5A  | -201  | -2076 | 3287 | 46    |

|      |       |       |      |     |
|------|-------|-------|------|-----|
| H5B  | 840   | -1968 | 3679 | 46  |
| H4A  | 1878  | -597  | 3086 | 45  |
| H4B  | 1075  | -1442 | 2665 | 45  |
| H8A  | -2079 | 2981  | 3384 | 51  |
| H8B  | -2539 | 1393  | 3667 | 51  |
| H10A | -628  | 4473  | 4544 | 71  |
| H10B | -576  | 4597  | 3913 | 71  |
| H13A | 2187  | 3676  | 4152 | 88  |
| H13B | 1374  | 5052  | 4370 | 88  |
| H13C | 1375  | 4601  | 3752 | 88  |
| H9A  | -2265 | 3542  | 4272 | 73  |
| H9B  | -1595 | 1956  | 4438 | 73  |
| H12A | 166   | 1272  | 4829 | 103 |
| H12B | 784   | 2868  | 5033 | 103 |
| H12C | 1469  | 1471  | 4740 | 103 |

---

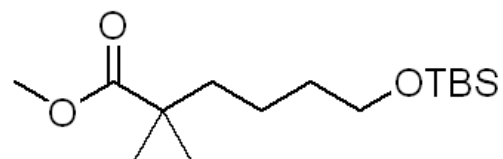

**S-1**

**$^1\text{H}$  NMR (400 M,  $\text{CDCl}_3$ )**

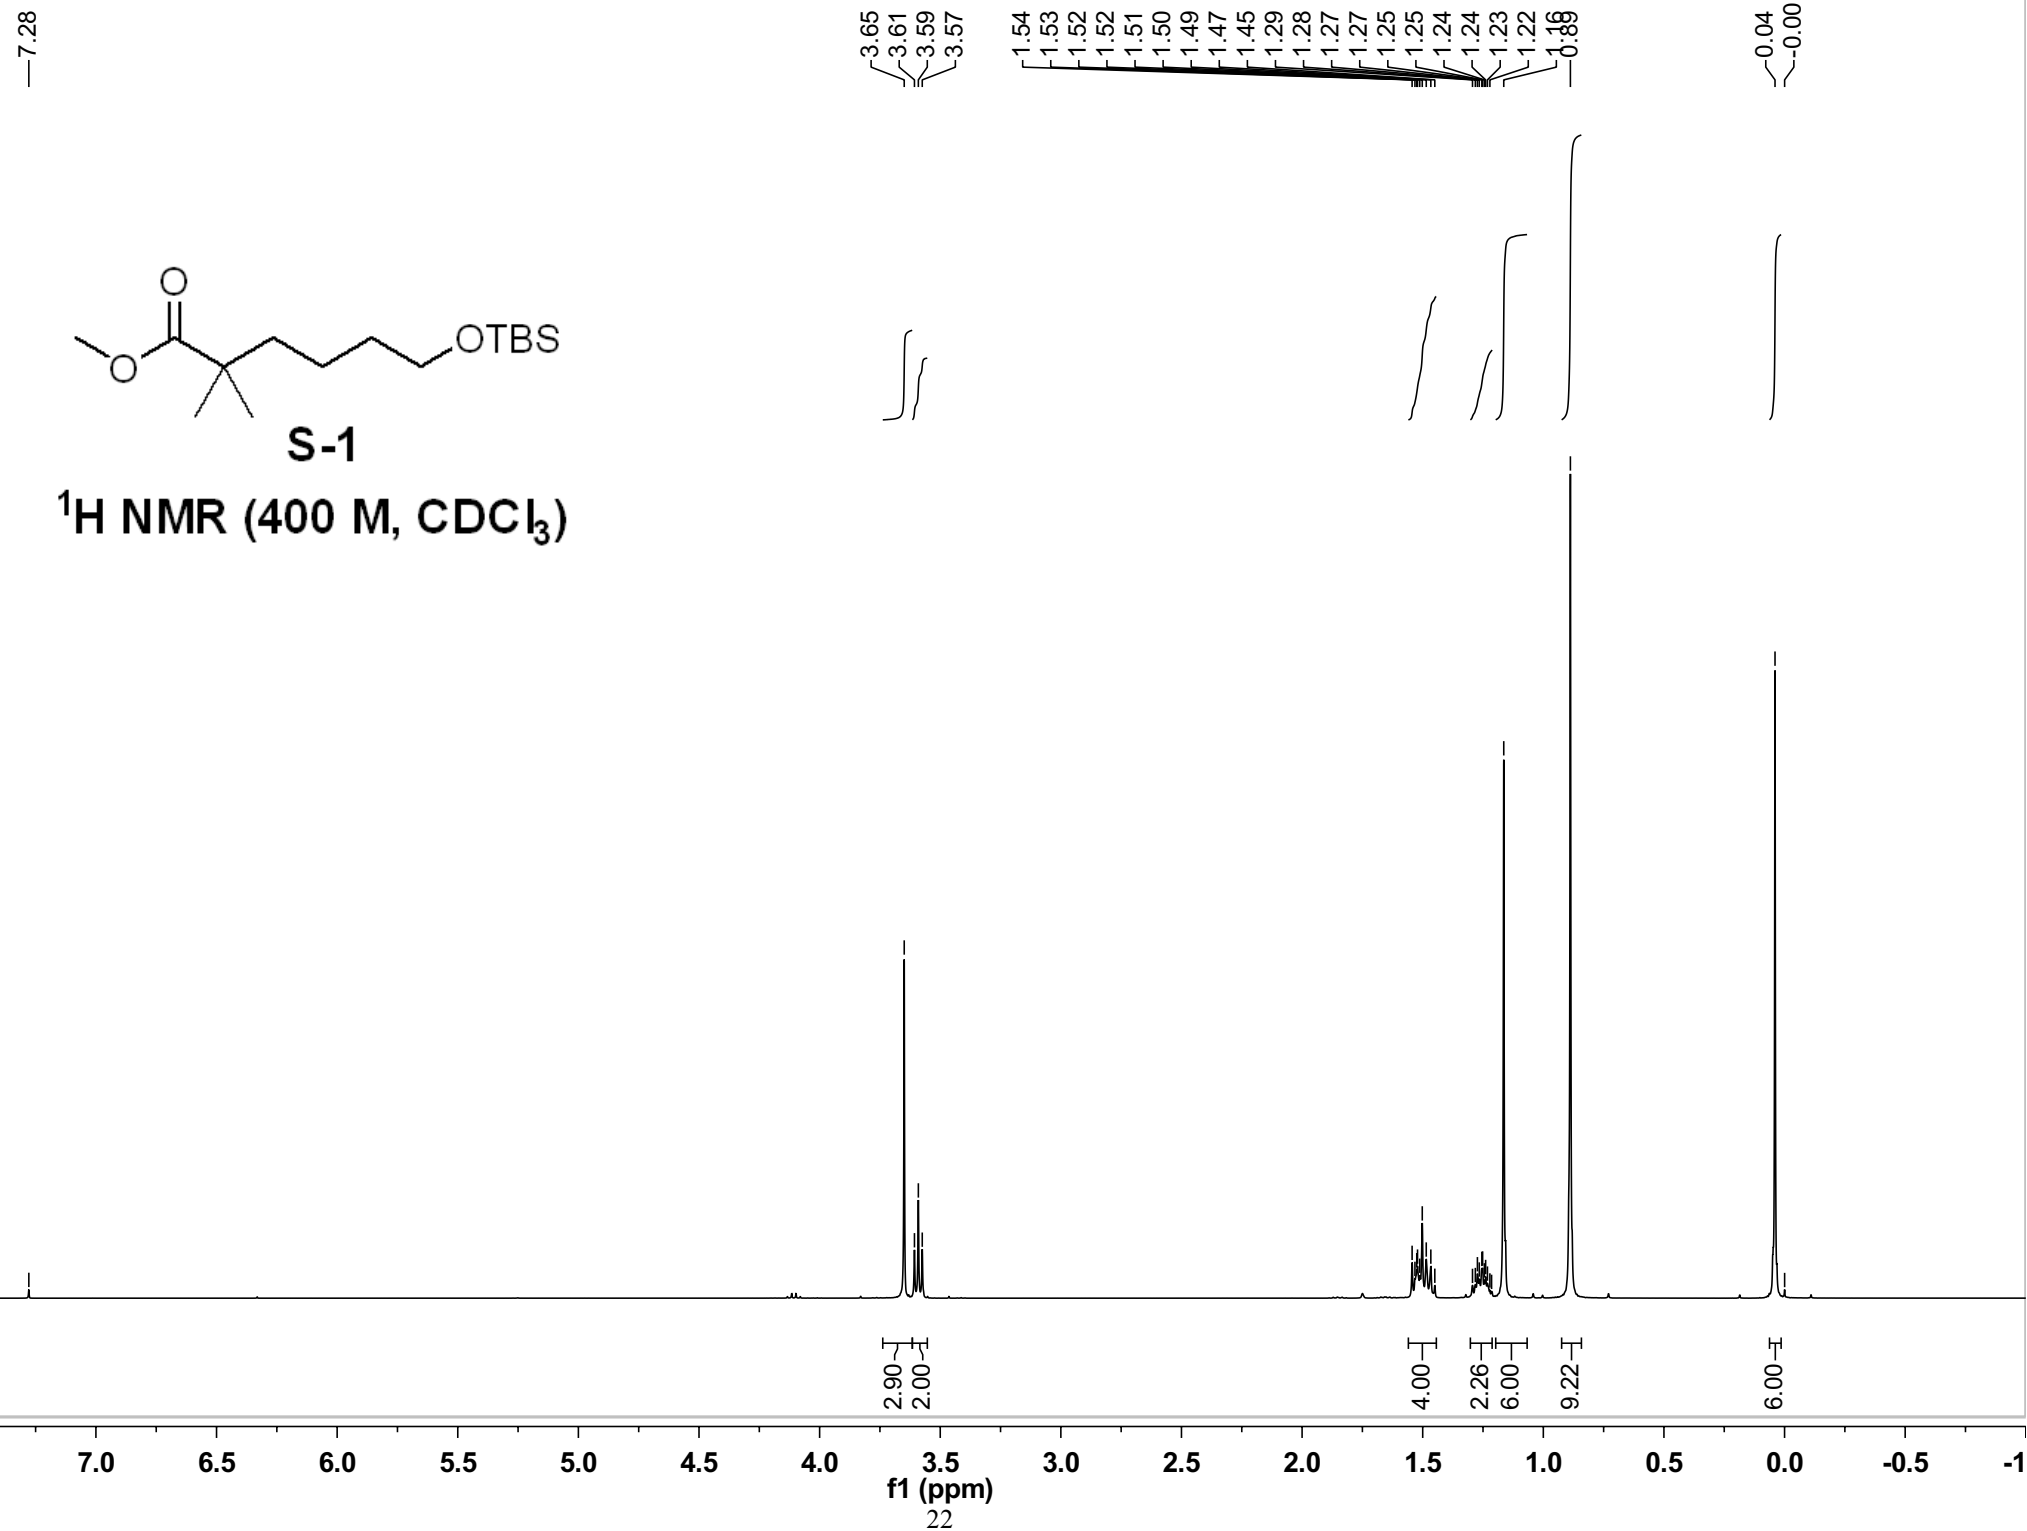

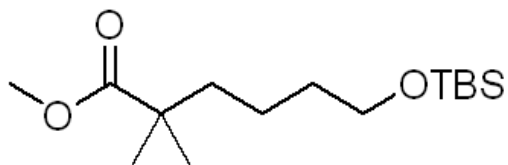

**S-1**

**$^{13}\text{C}$  NMR (100M,  $\text{CDCl}_3$ )**

—178.44

77.32  
77.00  
76.68

—62.88

—51.55

~42.28  
~40.57

—33.22

~25.92  
~25.10  
~21.24  
~18.29

—-5.31

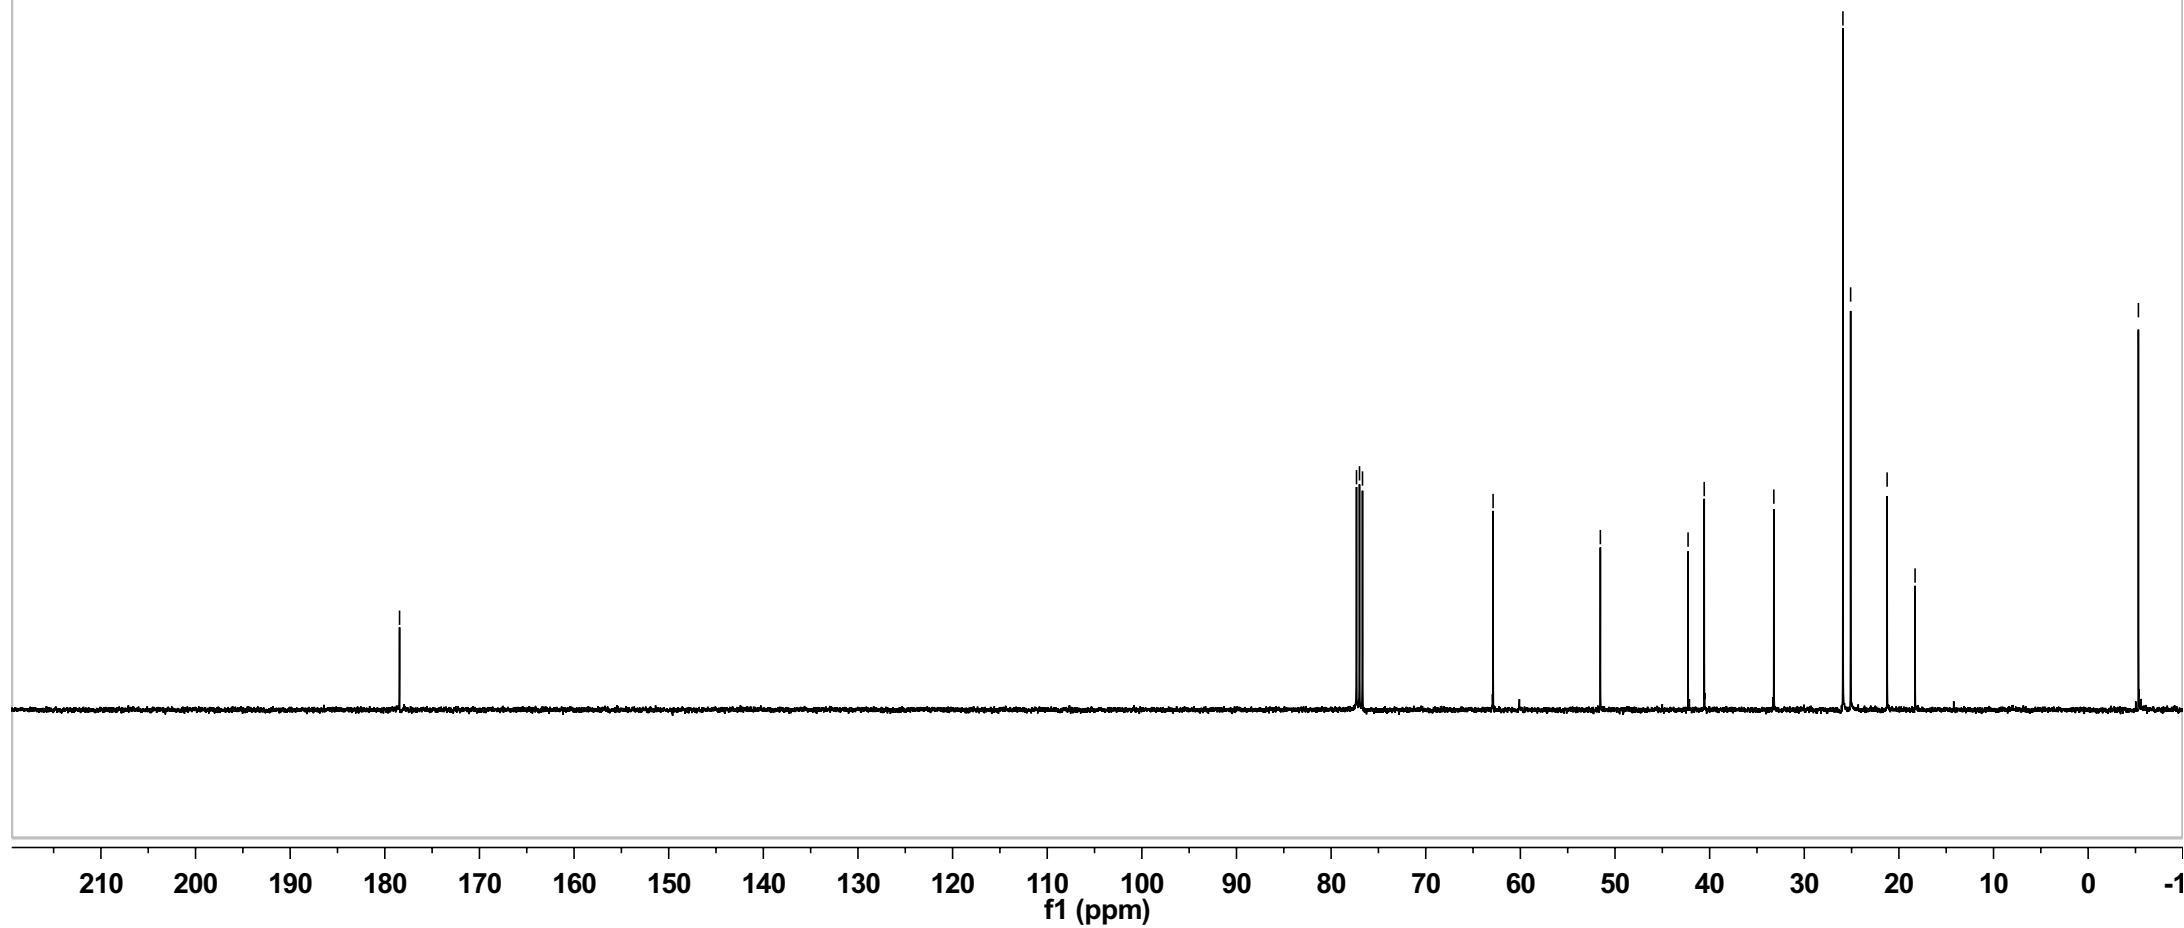

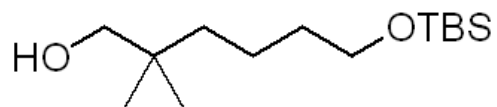

**20**

**<sup>1</sup>H NMR (400 M, CDCl<sub>3</sub>)**

—7.25

3.59  
3.57  
3.55

—3.24

—2.06

1.47

1.45

1.43

1.24

1.22

1.21

1.20

1.19

0.85

0.81

—0.00

0 7.5 7.0 6.5 6.0 5.5 5.0 4.5 4.0 3.5 3.0 2.5 2.0 1.5 1.0 0.5 0.0 -0.5 -1

f1 (ppm)  
24

2.00

2.00

1.05

2.00

4.06

8.92

6.00

6.00



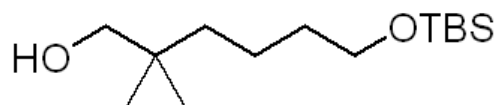

20

$^{13}\text{C}$  NMR (100M,  $\text{CDCl}_3$ )

77.32  
77.00  
76.68

71.70

63.02

38.24  
35.00  
33.53

25.91

23.80

19.97

18.28

-5.31

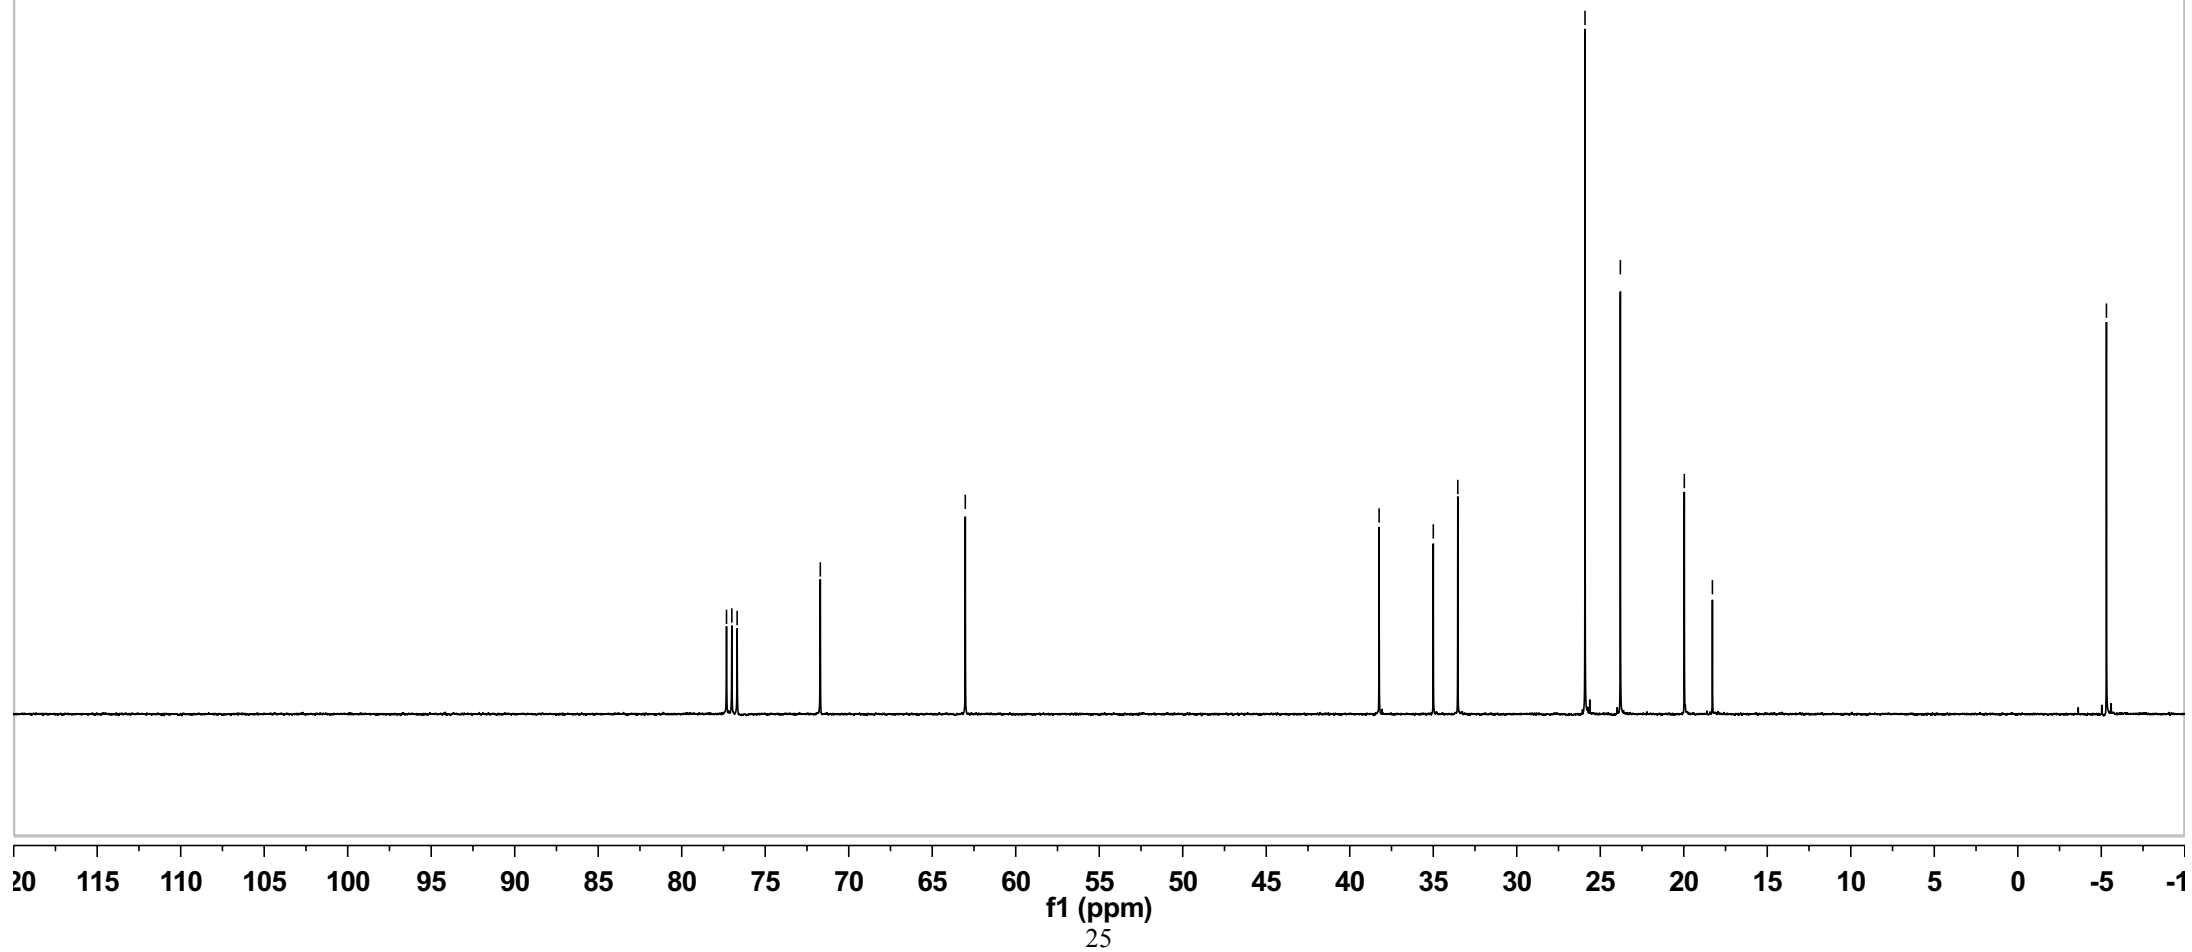

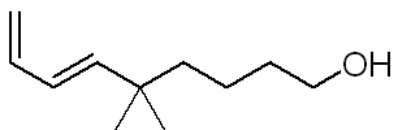

21

$^1\text{H}$  NMR (400 M,  $\text{CDCl}_3$ )

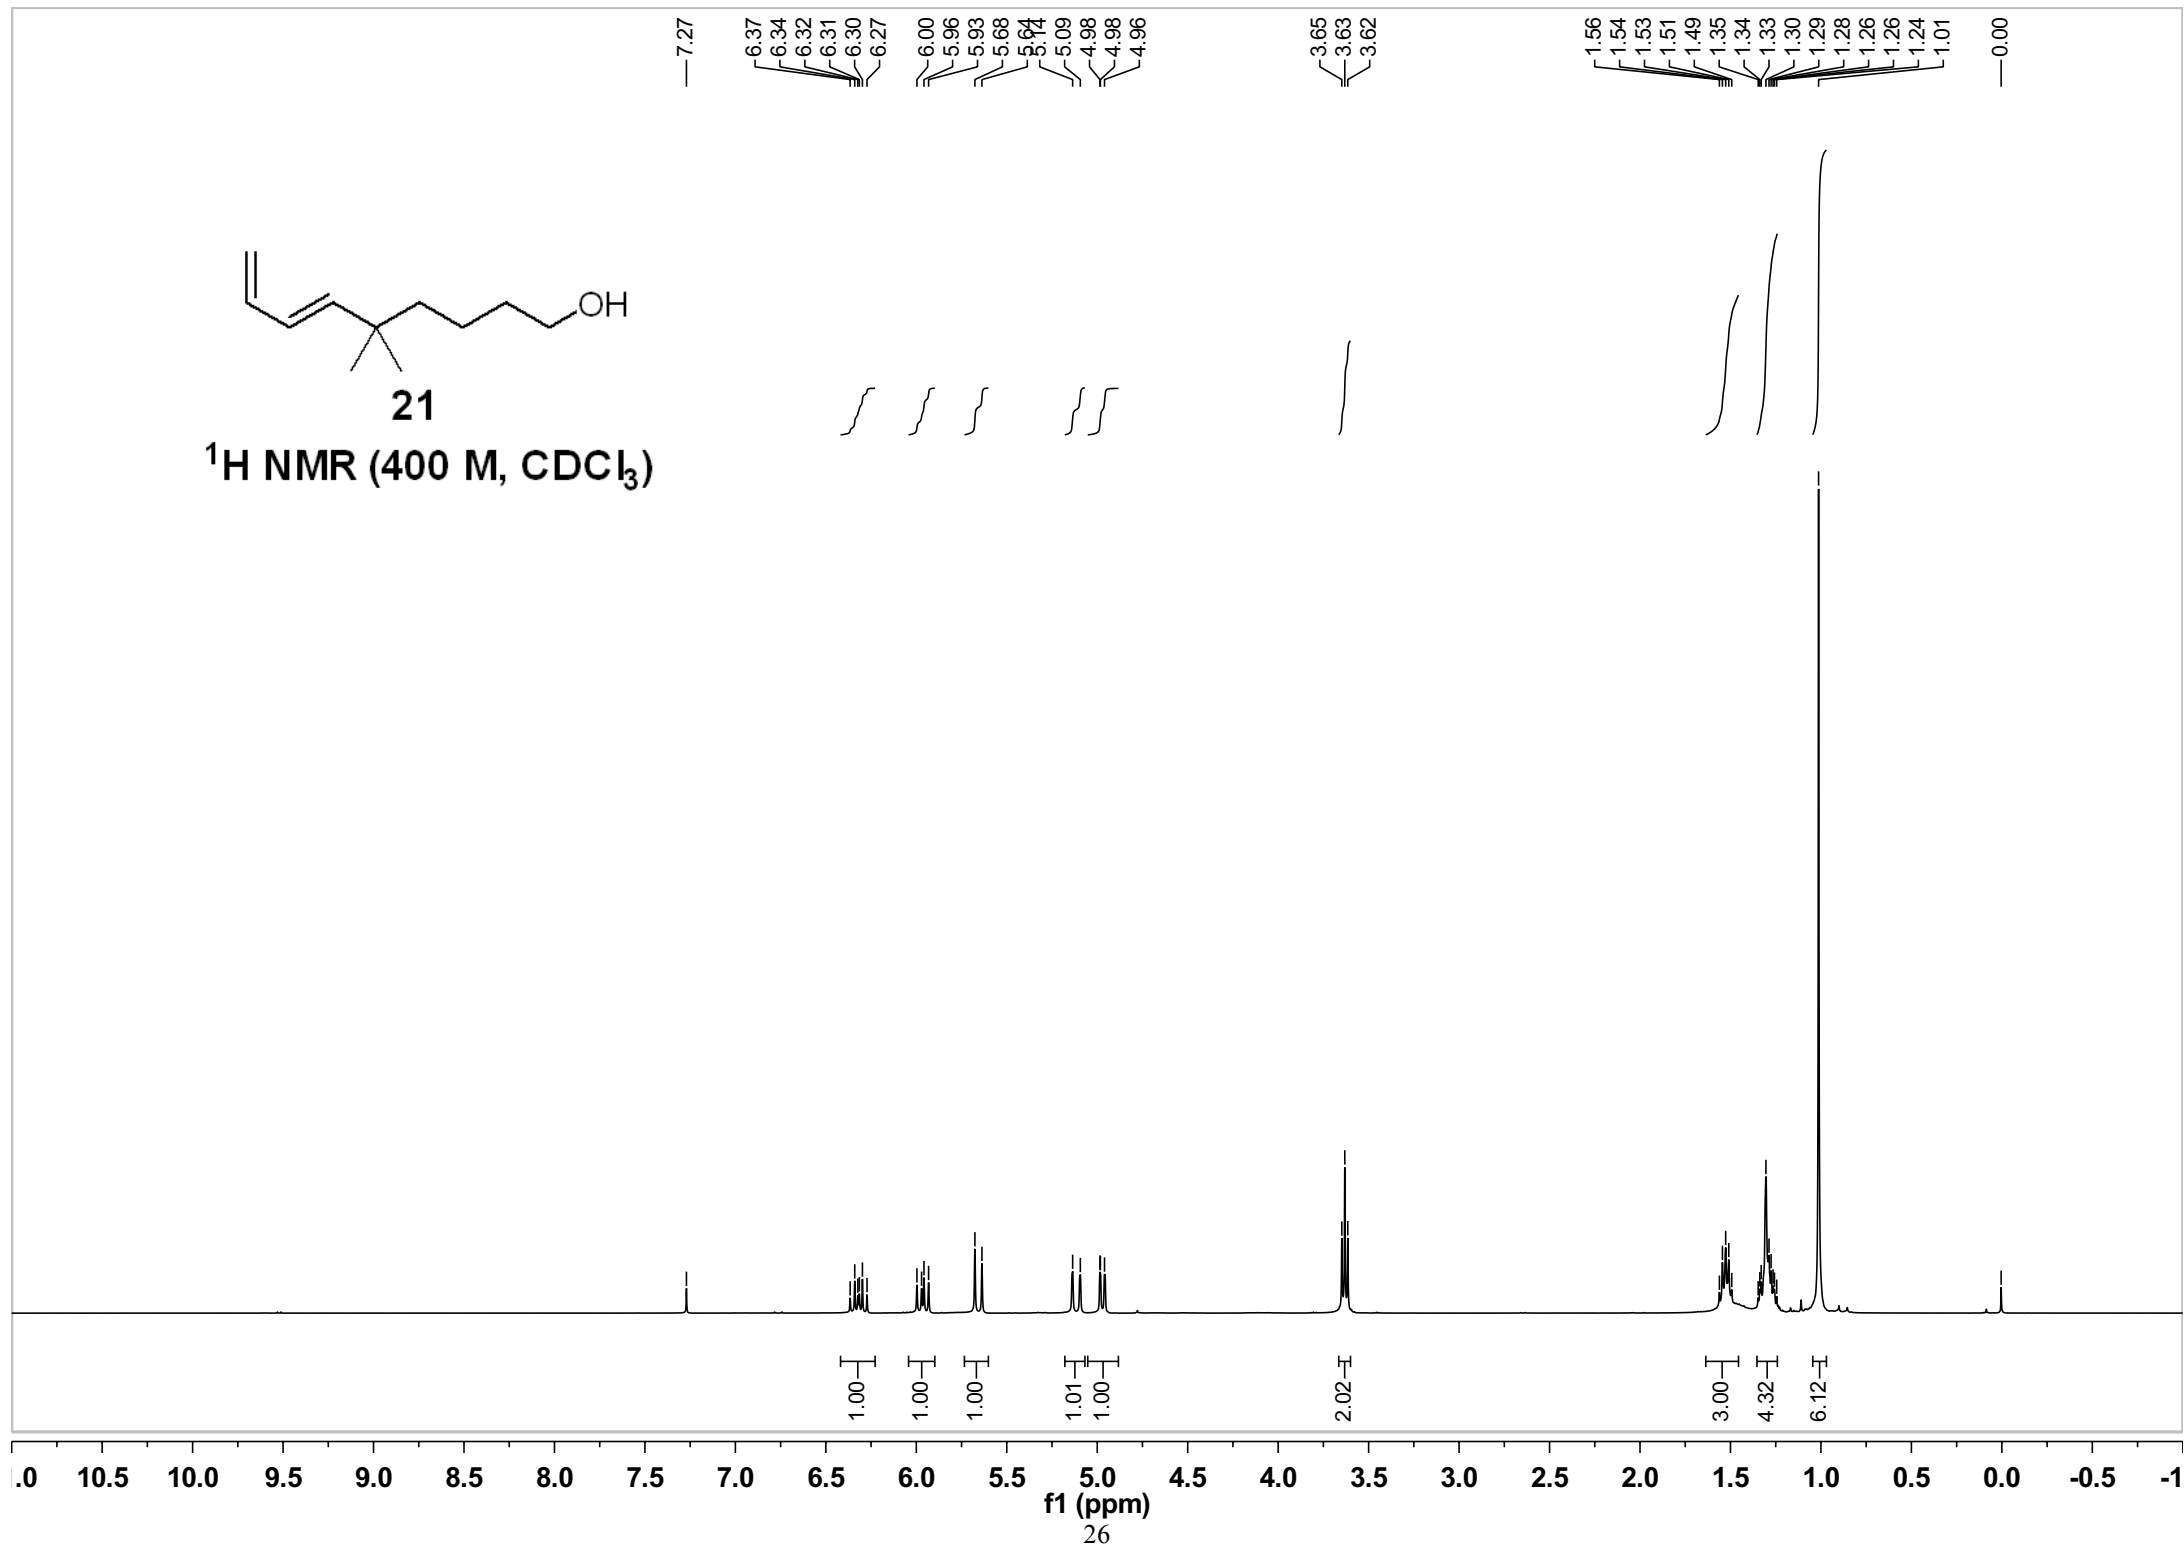

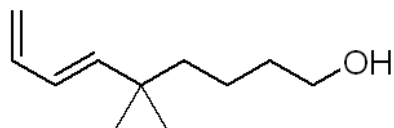

21

$^{13}\text{C}$  NMR (100M,  $\text{CDCl}_3$ )

145.08 137.69 126.99 114.76 77.32 77.00 76.68 62.96 42.93 36.03 33.49 27.04 20.90

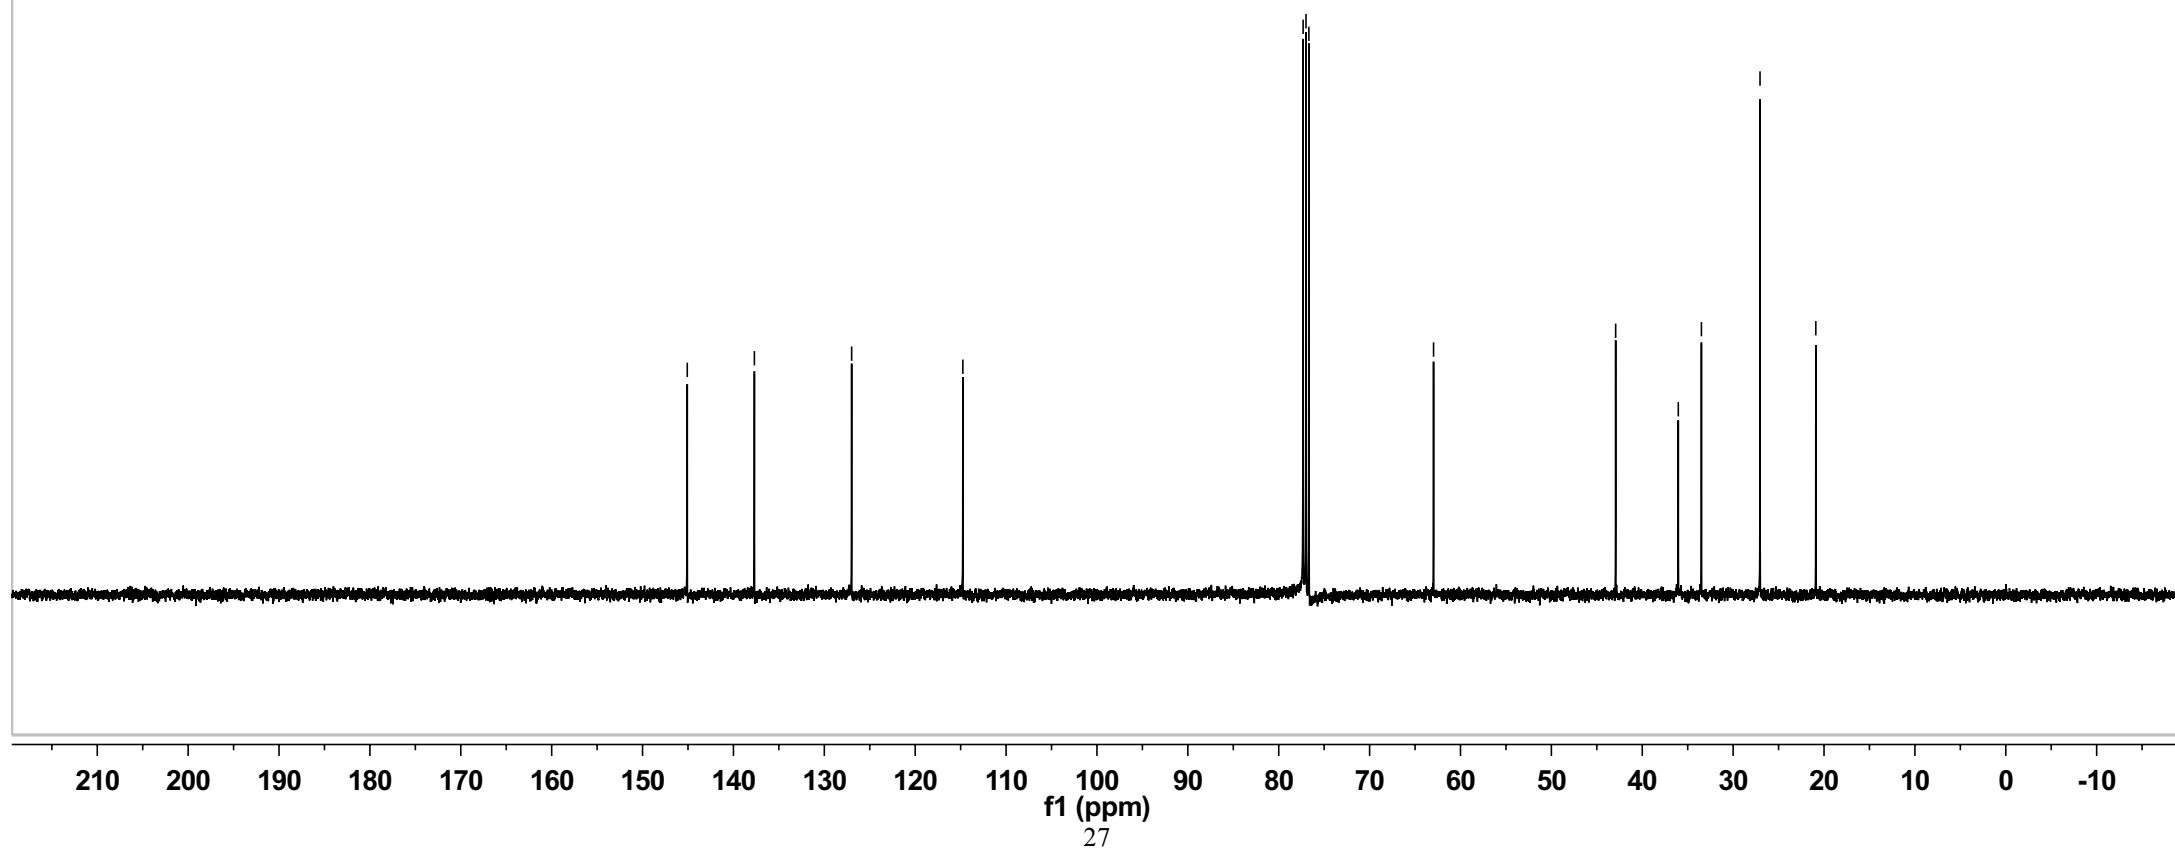

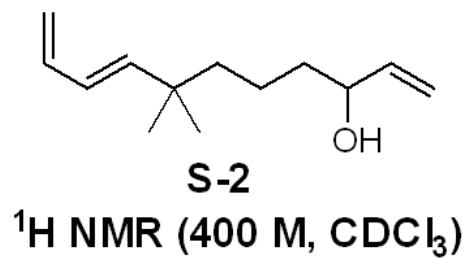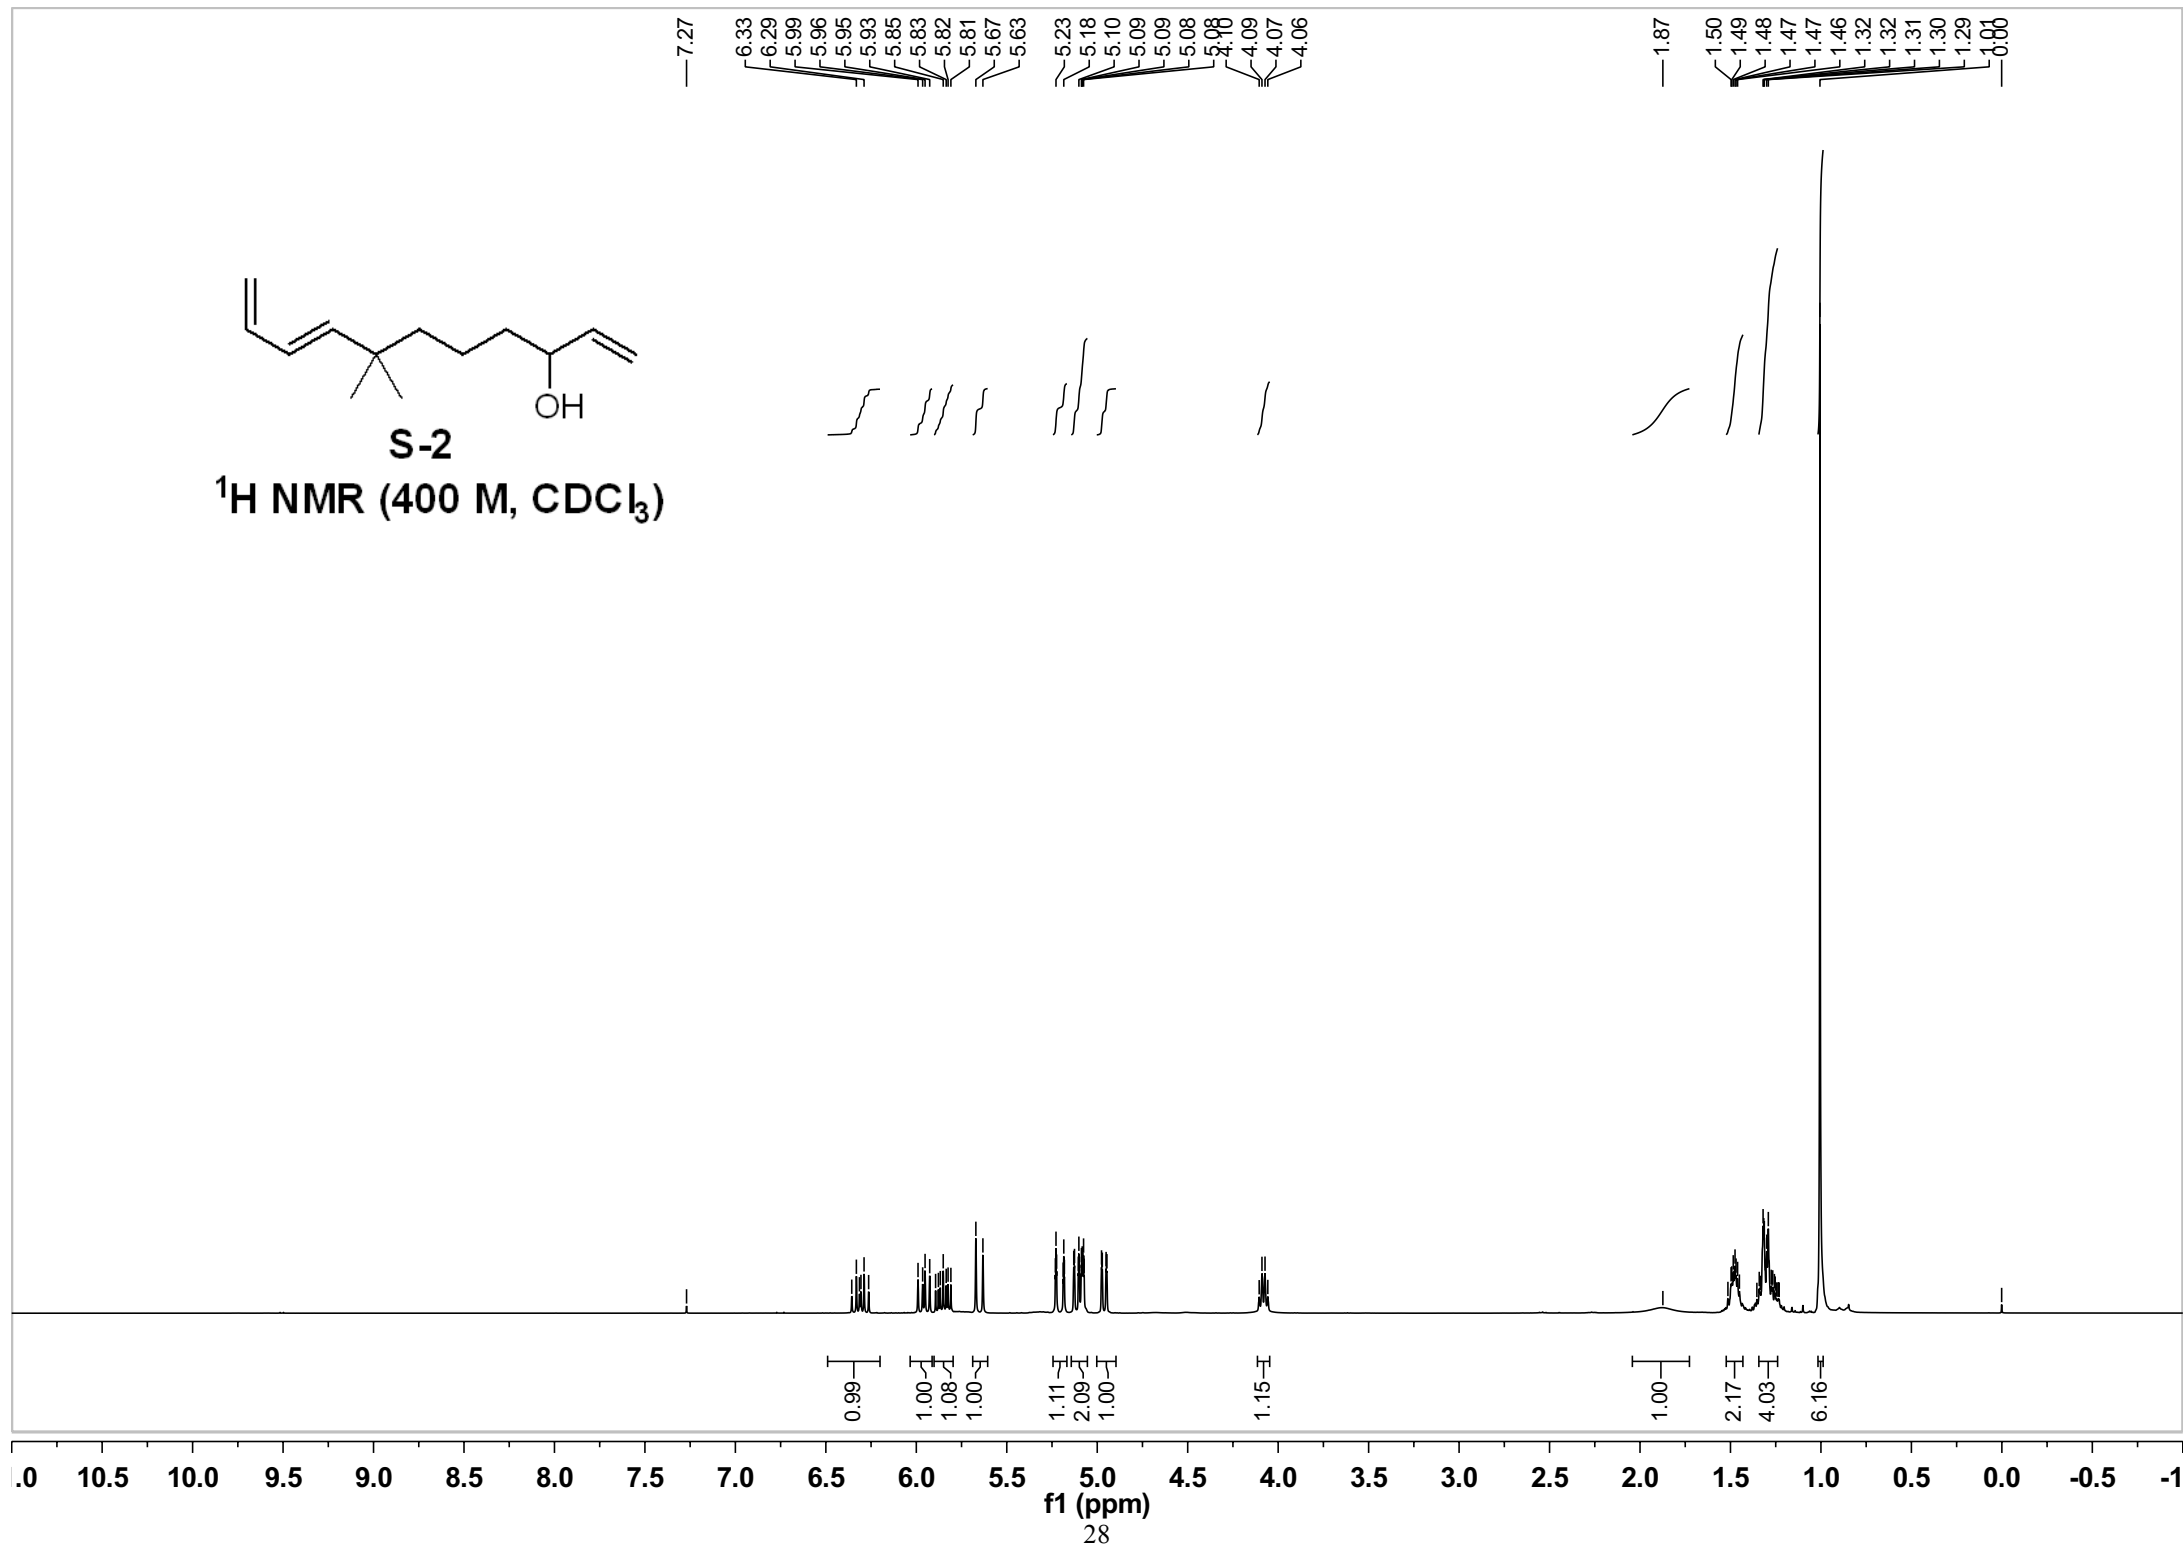

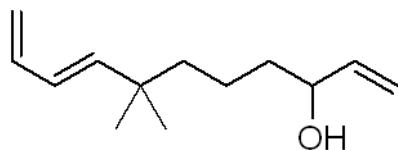

**S-2**

**$^{13}\text{C}$  NMR (100M,  $\text{CDCl}_3$ )**

~145.04  
—141.25  
~137.69

—126.95

~114.69  
~114.46

~77.32  
~77.00  
~76.68  
~73.08

~42.97  
~37.69  
~36.02

—27.03

—20.45

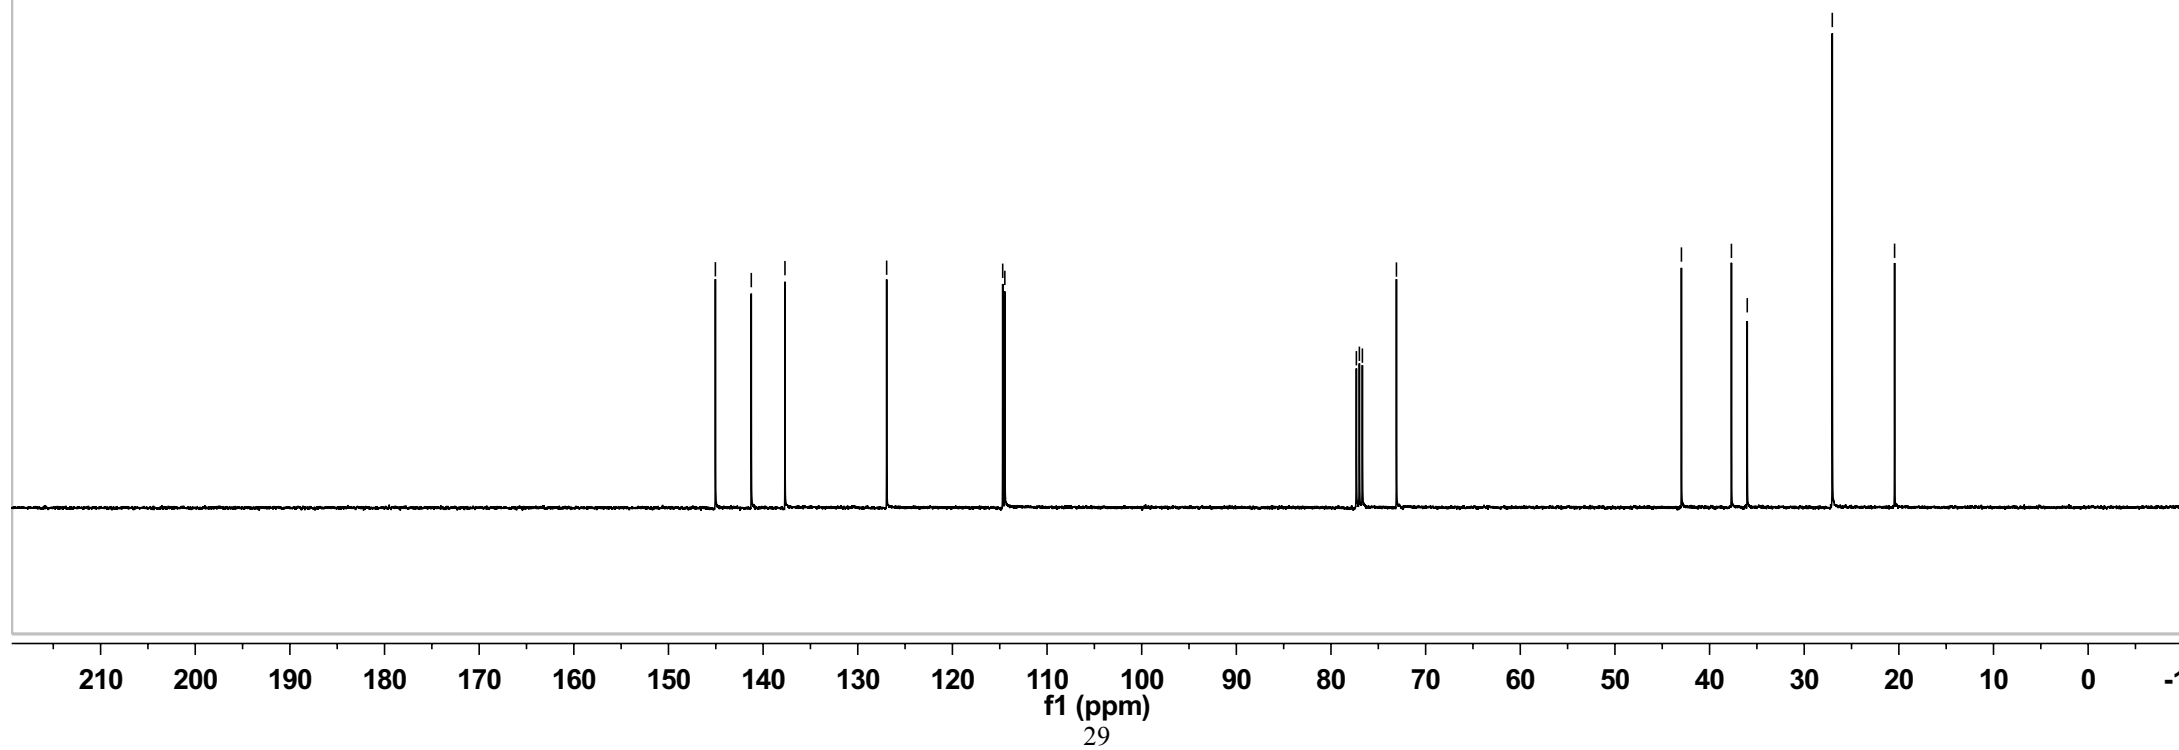

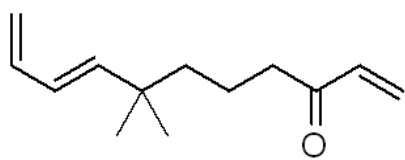

16

<sup>1</sup>H NMR (400 M, CDCl<sub>3</sub>)

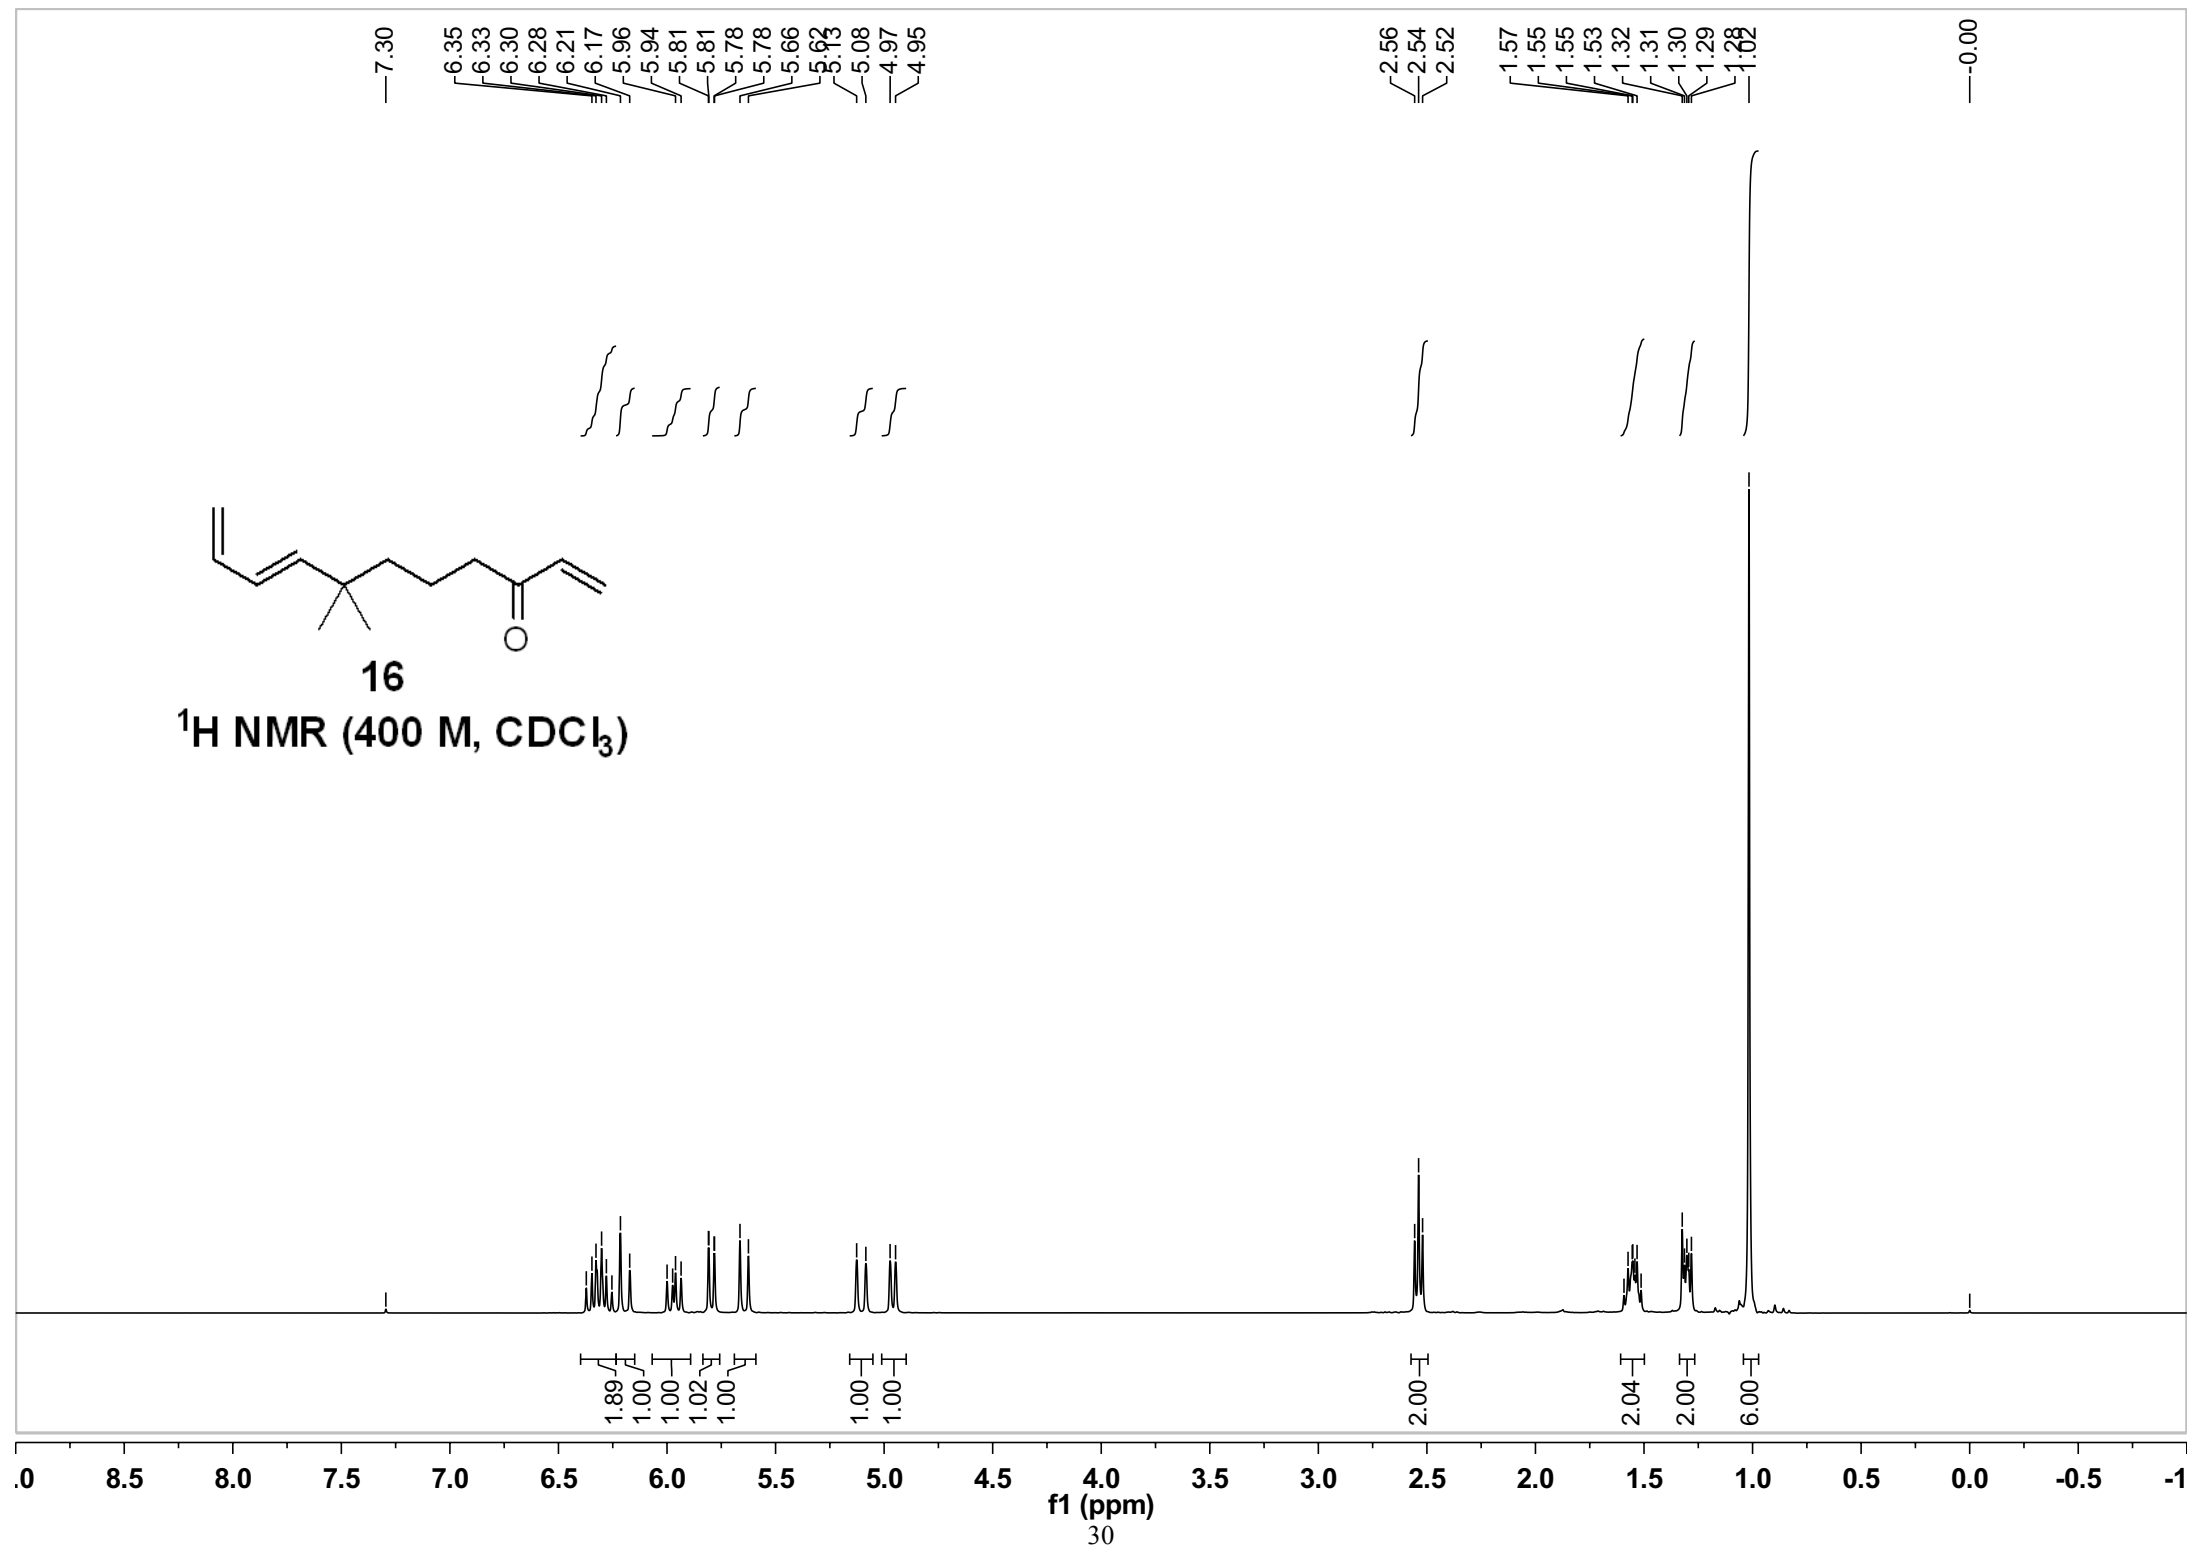

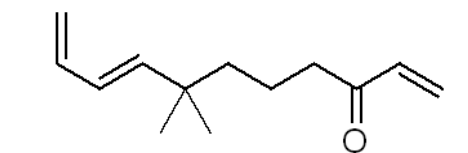

**16**

**$^{13}\text{C}$  NMR (100M,  $\text{CDCl}_3$ )**

—200.58

—144.54

~137.52

~136.44

~127.70

~127.13

—114.79

77.32

77.00

76.68

~42.43

~40.07

~35.93

—26.91

—19.15

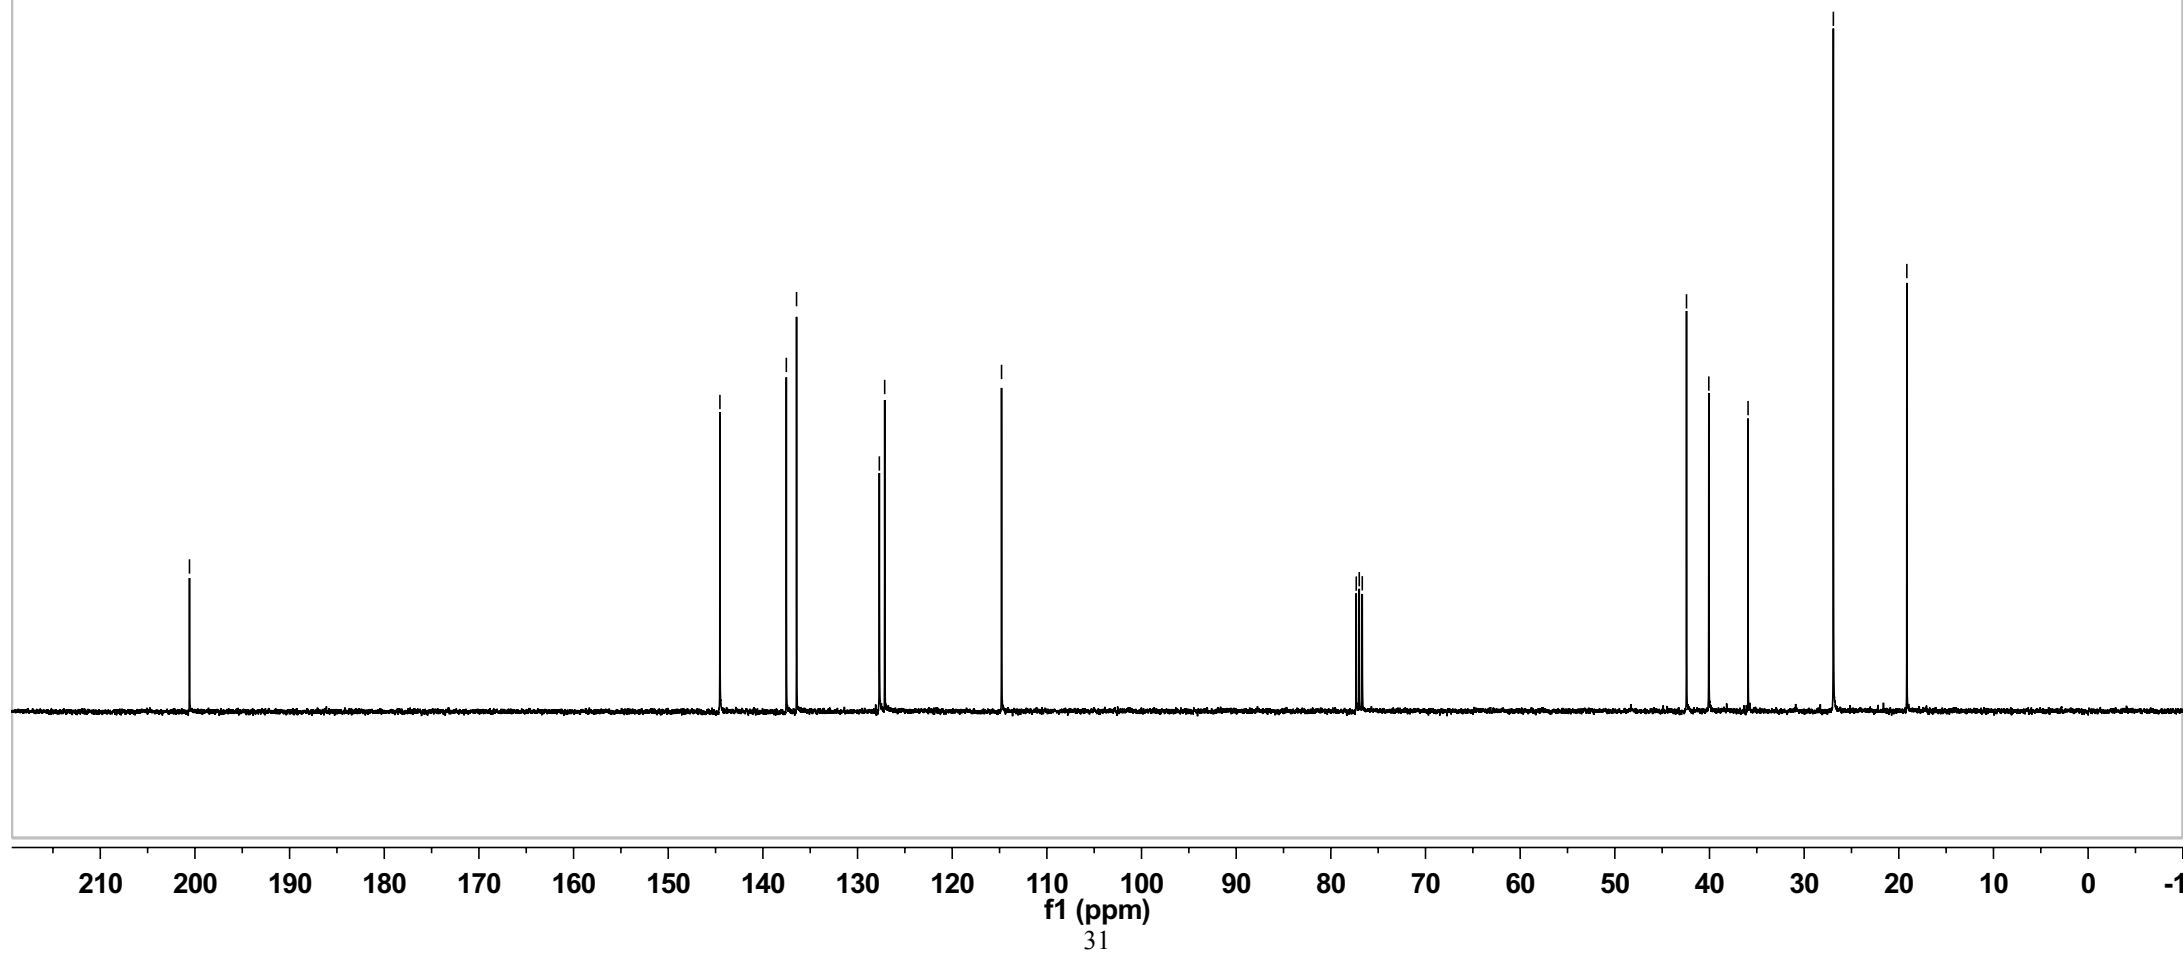

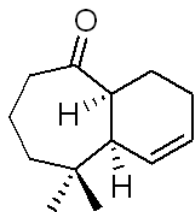

**22**

**$^1\text{H}$  NMR (400 M,  $\text{CDCl}_3$ )**

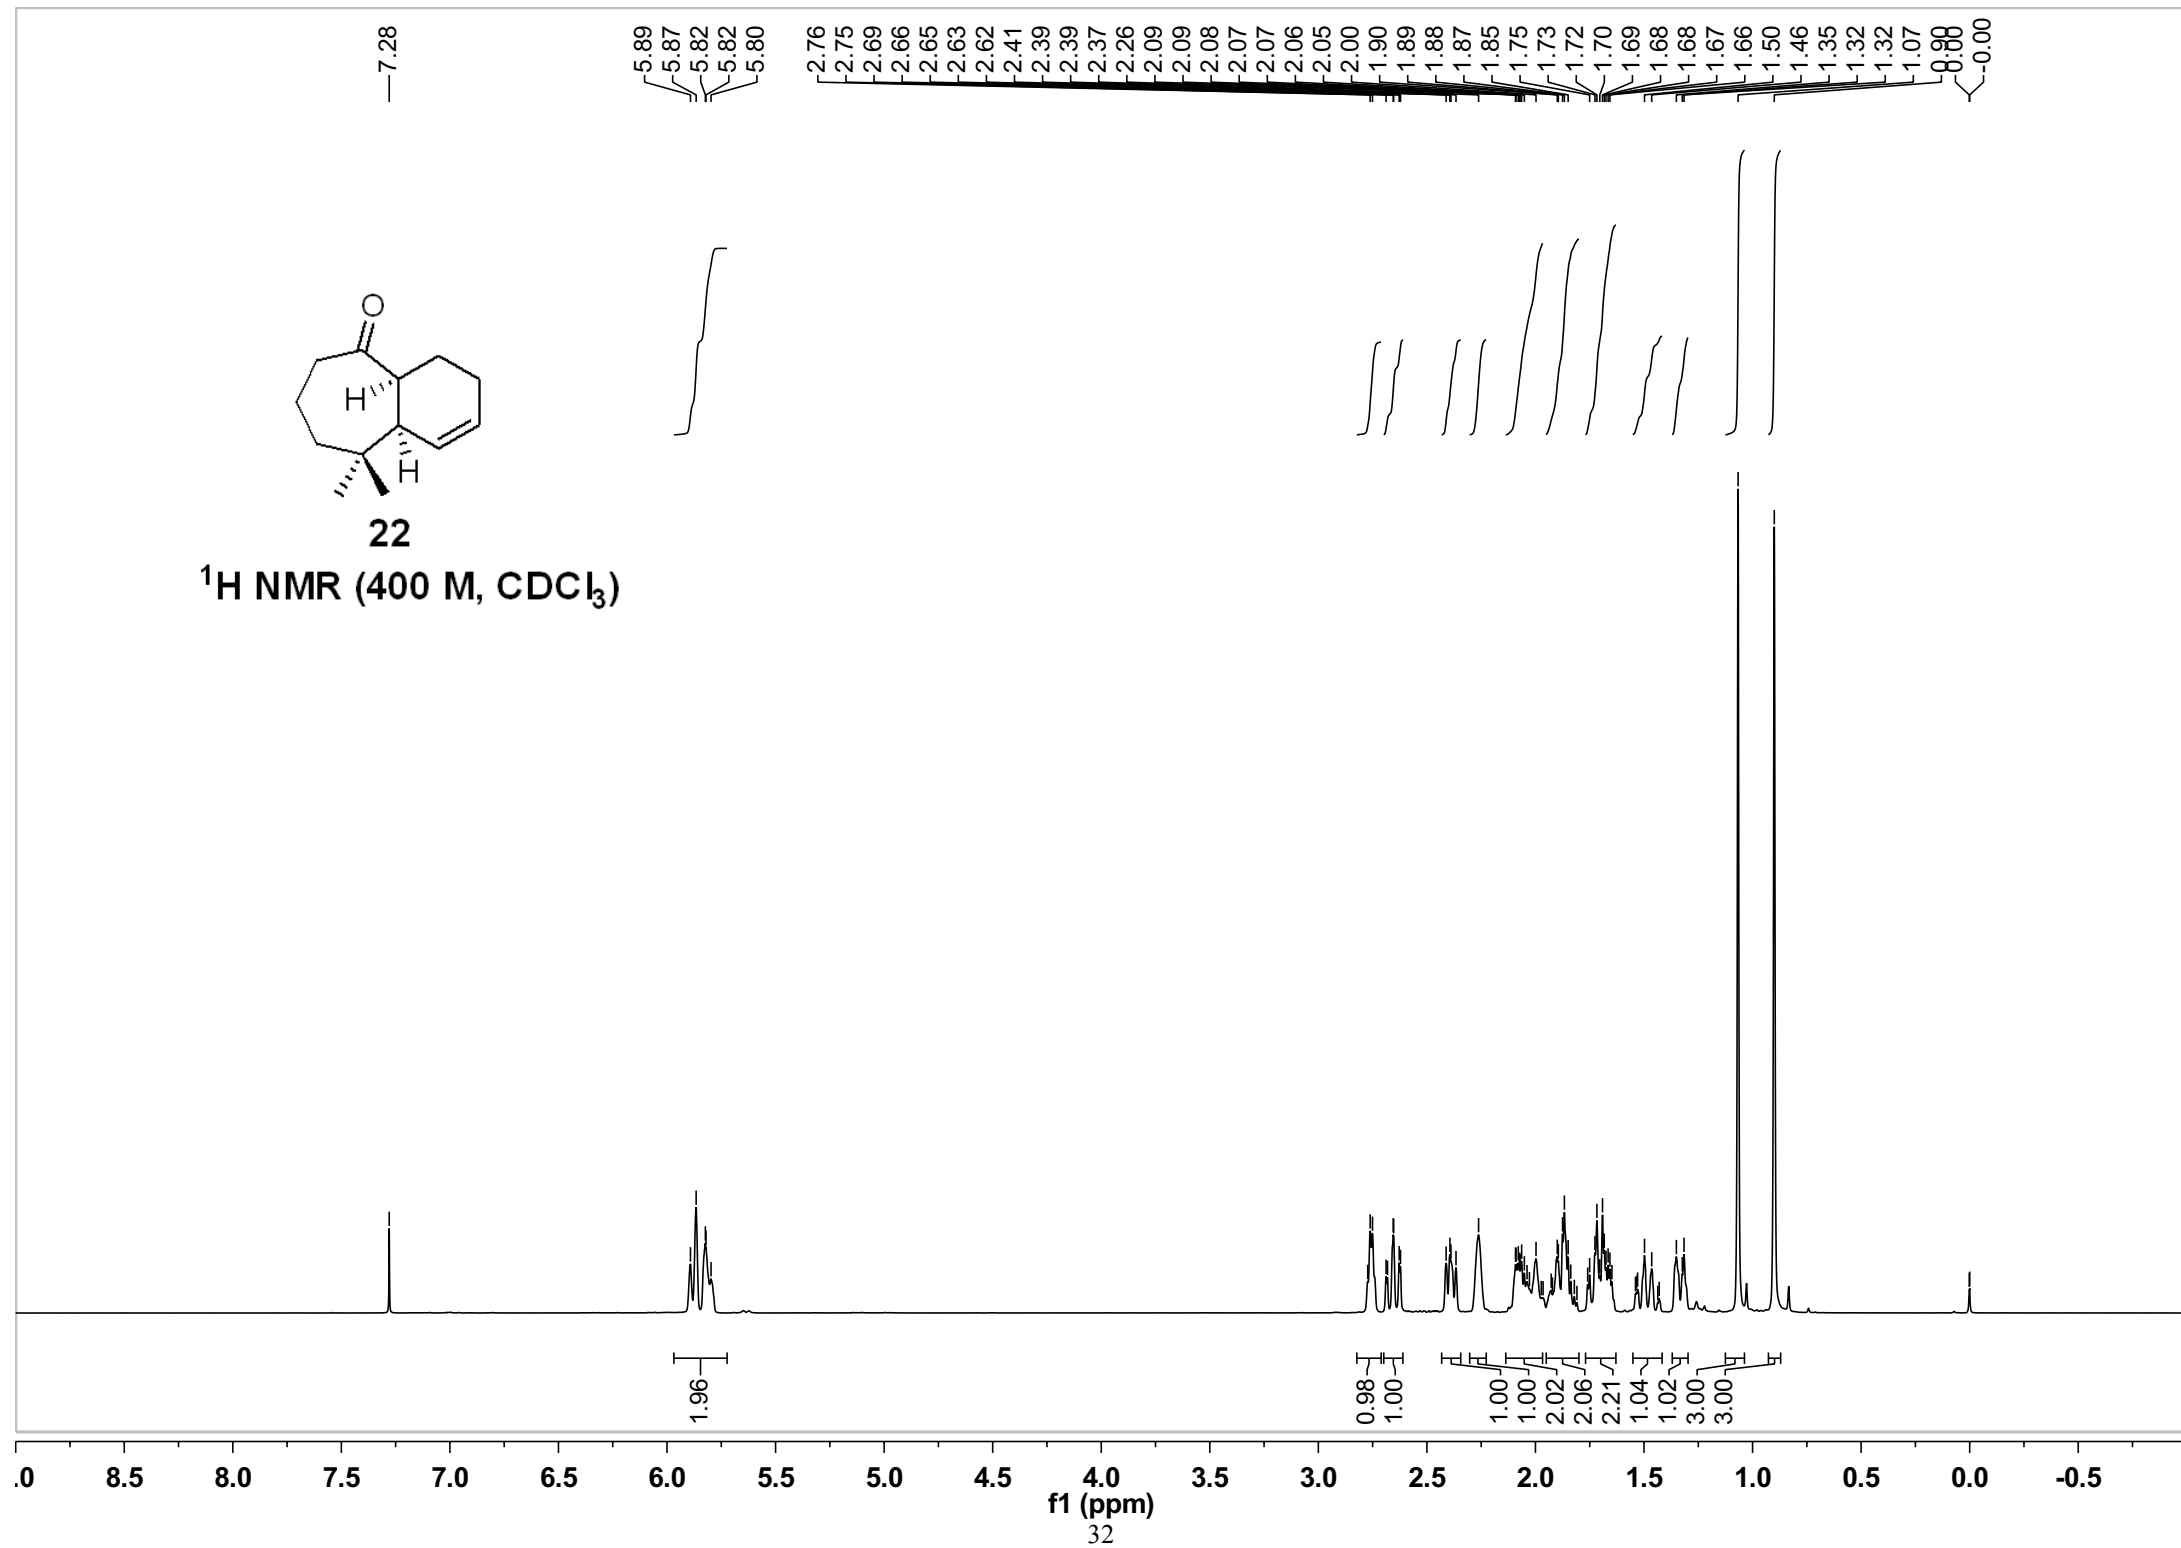



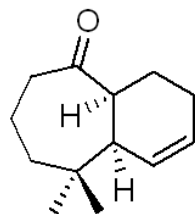

22

$^{13}\text{C}$  NMR (100M,  $\text{CDCl}_3$ )

—217.93

128.16  
127.56

77.32  
77.00  
76.68

48.38  
44.94  
44.55  
38.22  
36.44  
31.00  
28.41  
25.18  
22.26  
21.70

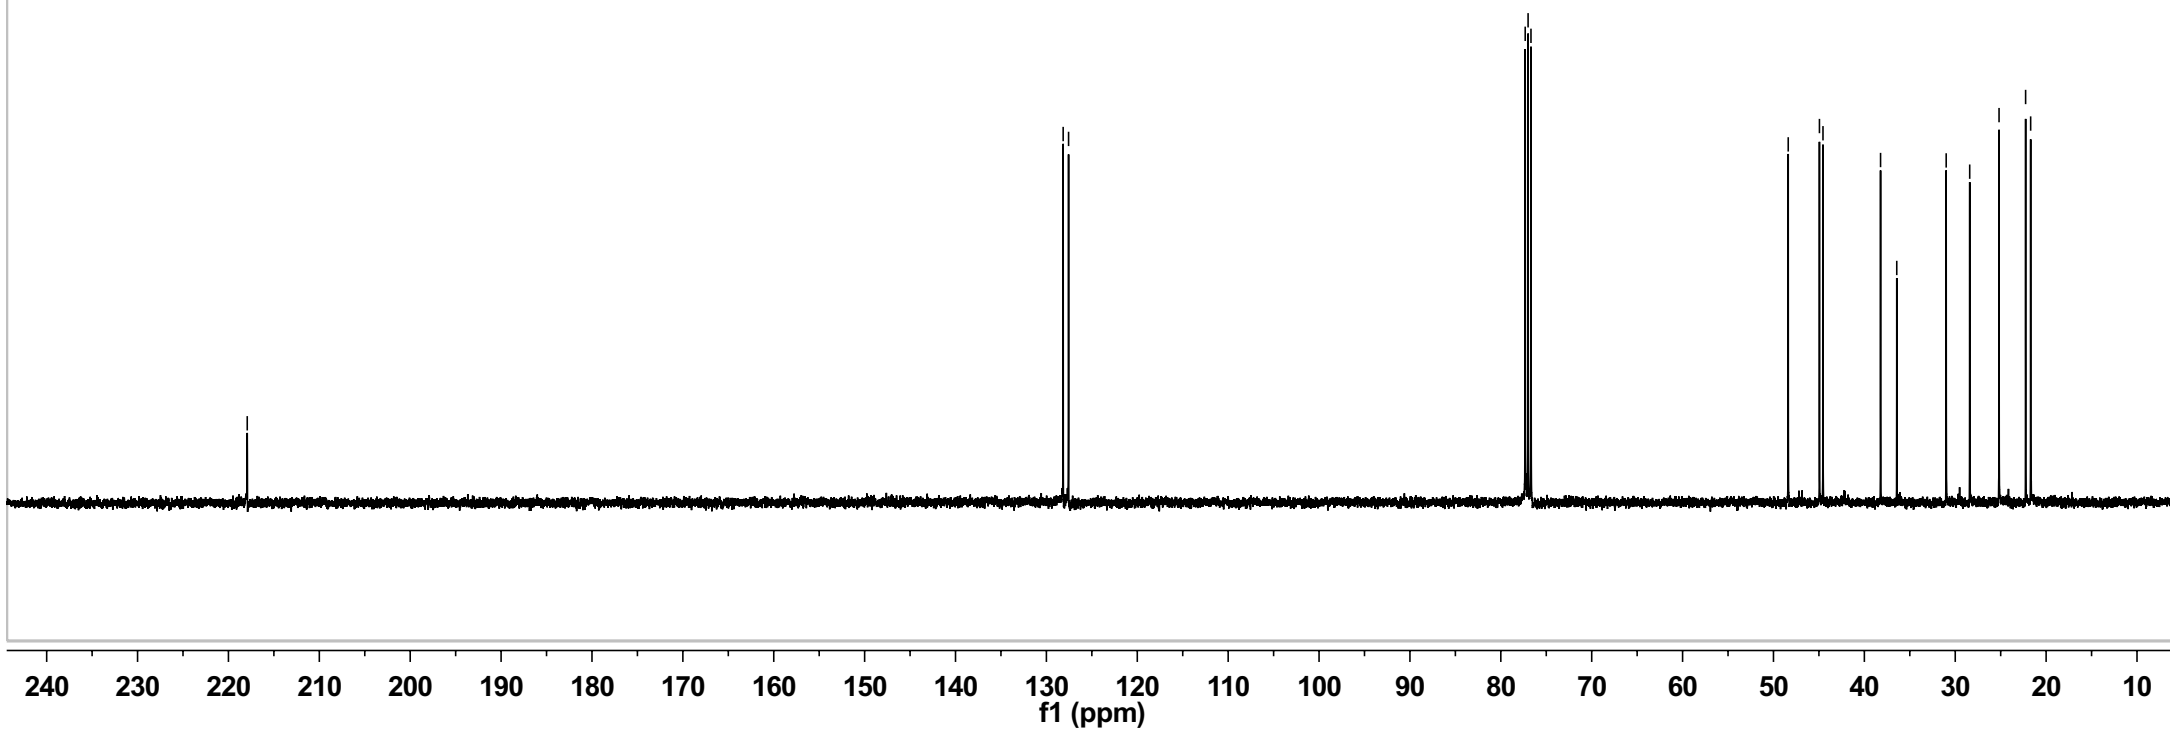

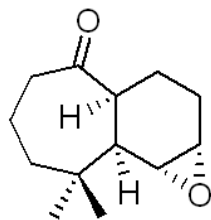

**15**

**$^1\text{H}$  NMR (400 M,  $\text{CDCl}_3$ )**

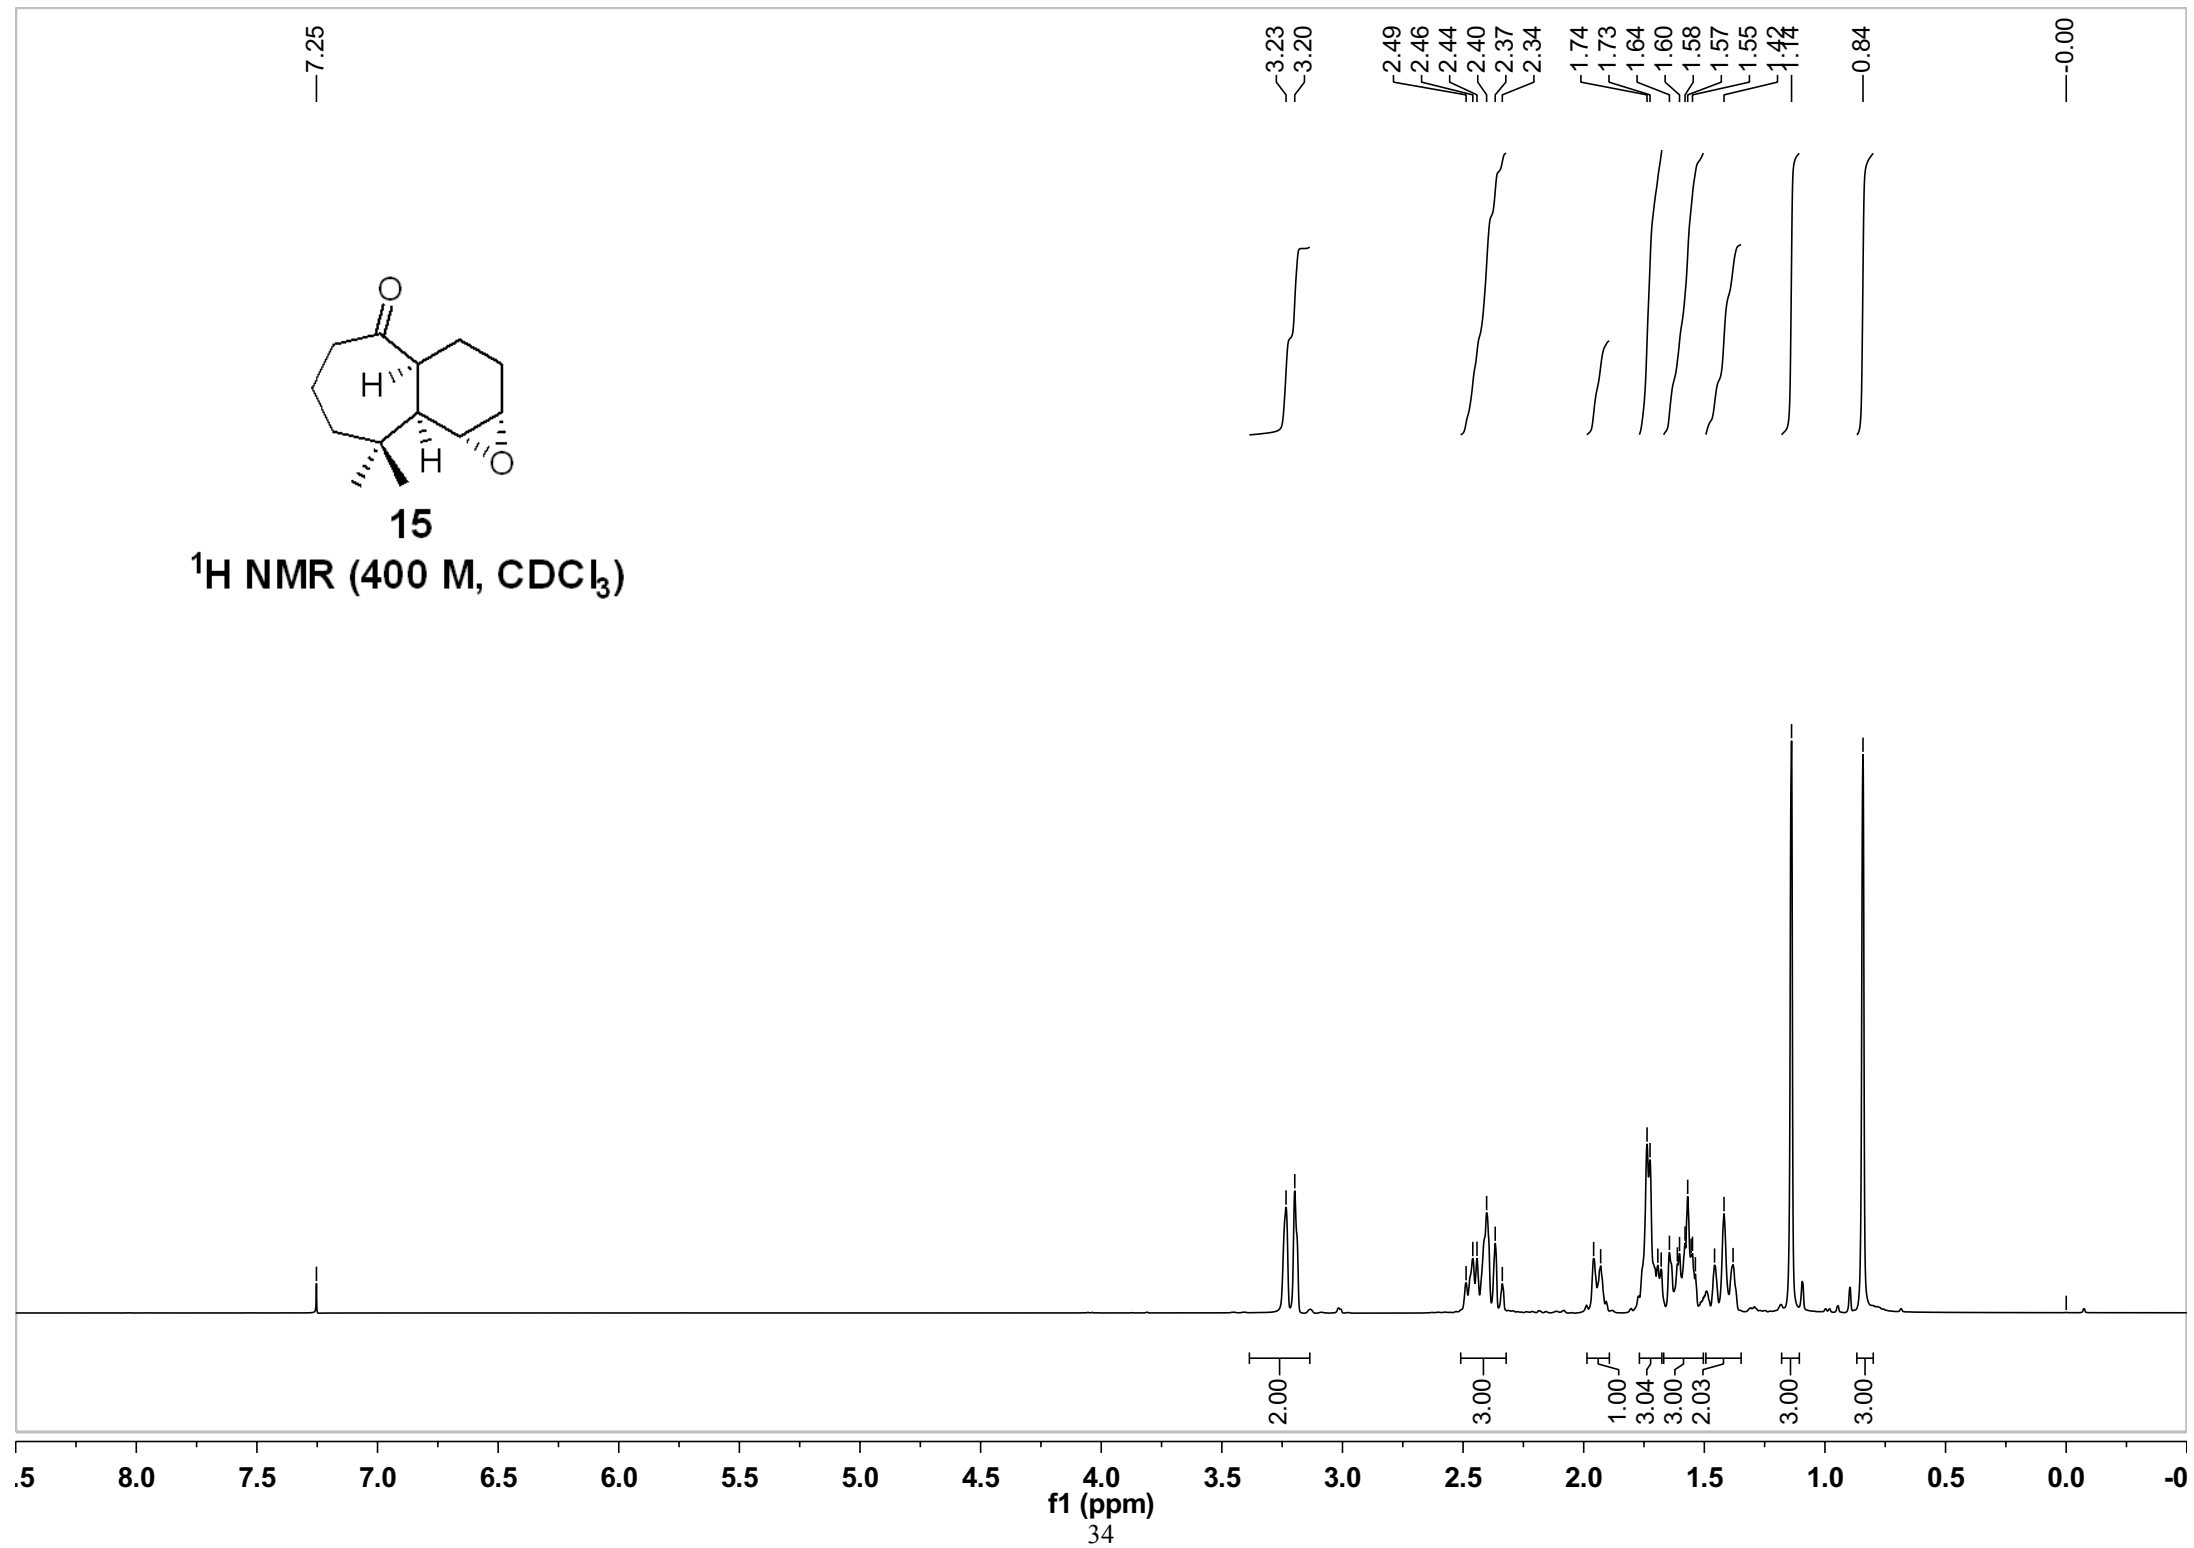

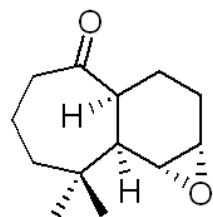

**15**

**$^{13}\text{C}$  NMR (100M,  $\text{CDCl}_3$ )**

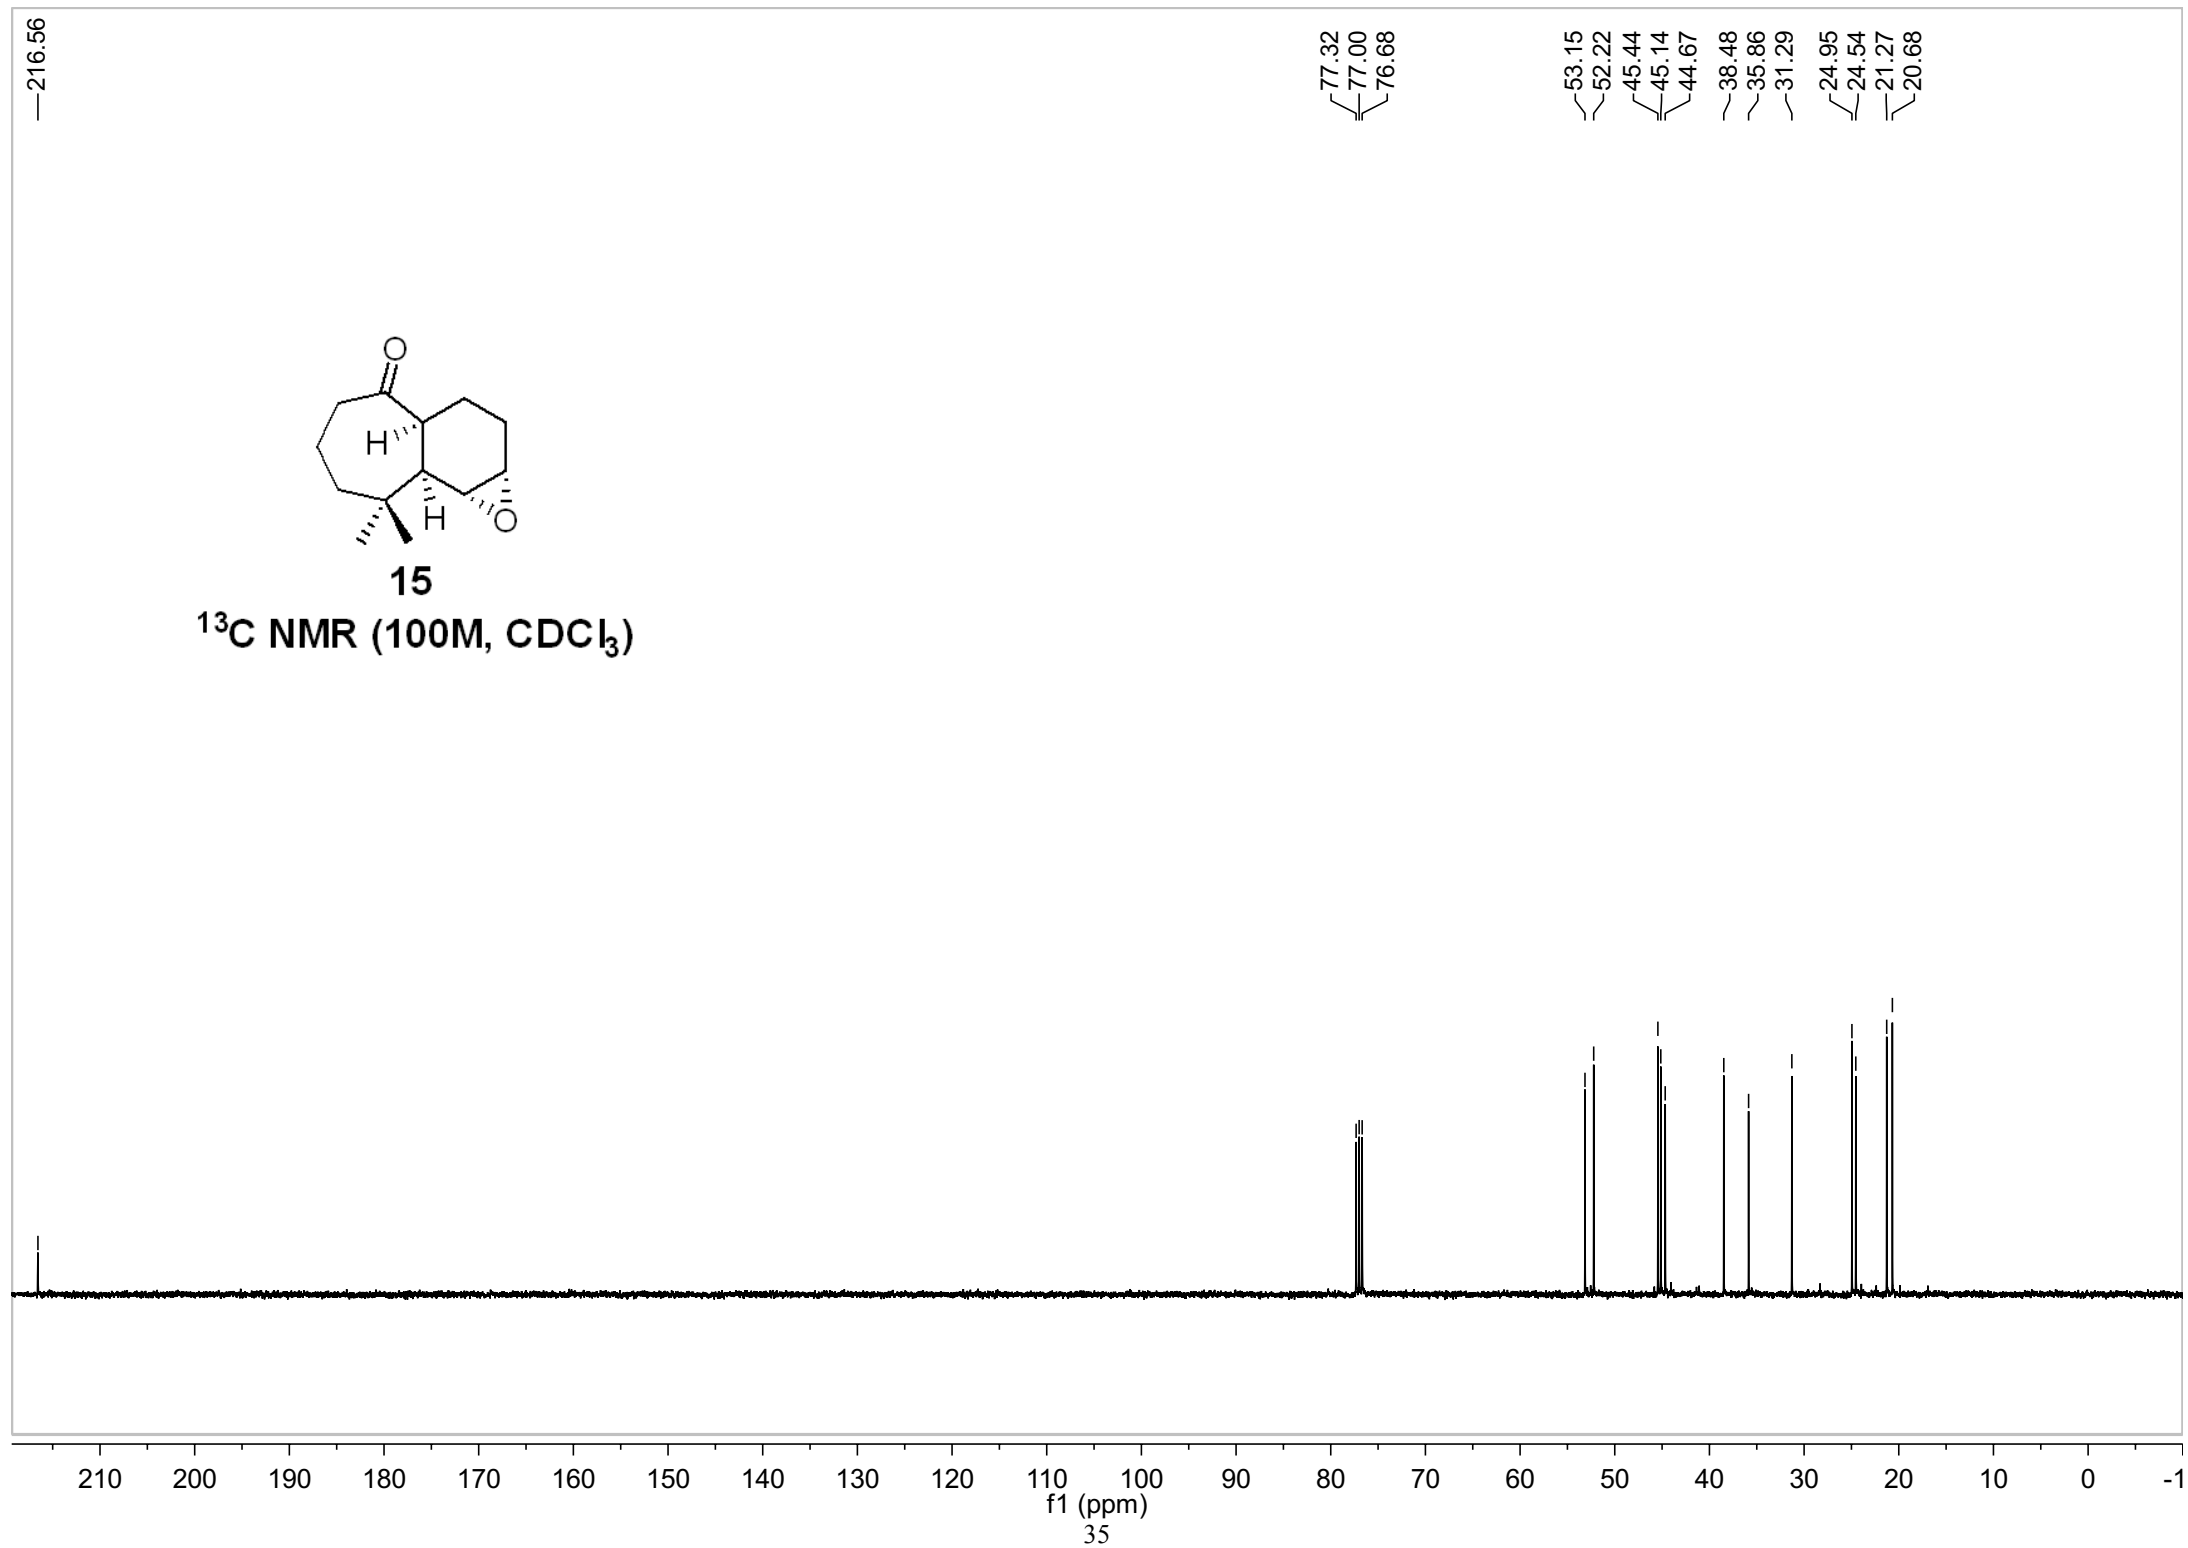

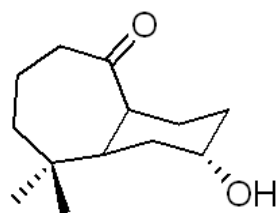

**23**

**$^1\text{H}$  NMR (400 M,  $\text{CDCl}_3$ )**

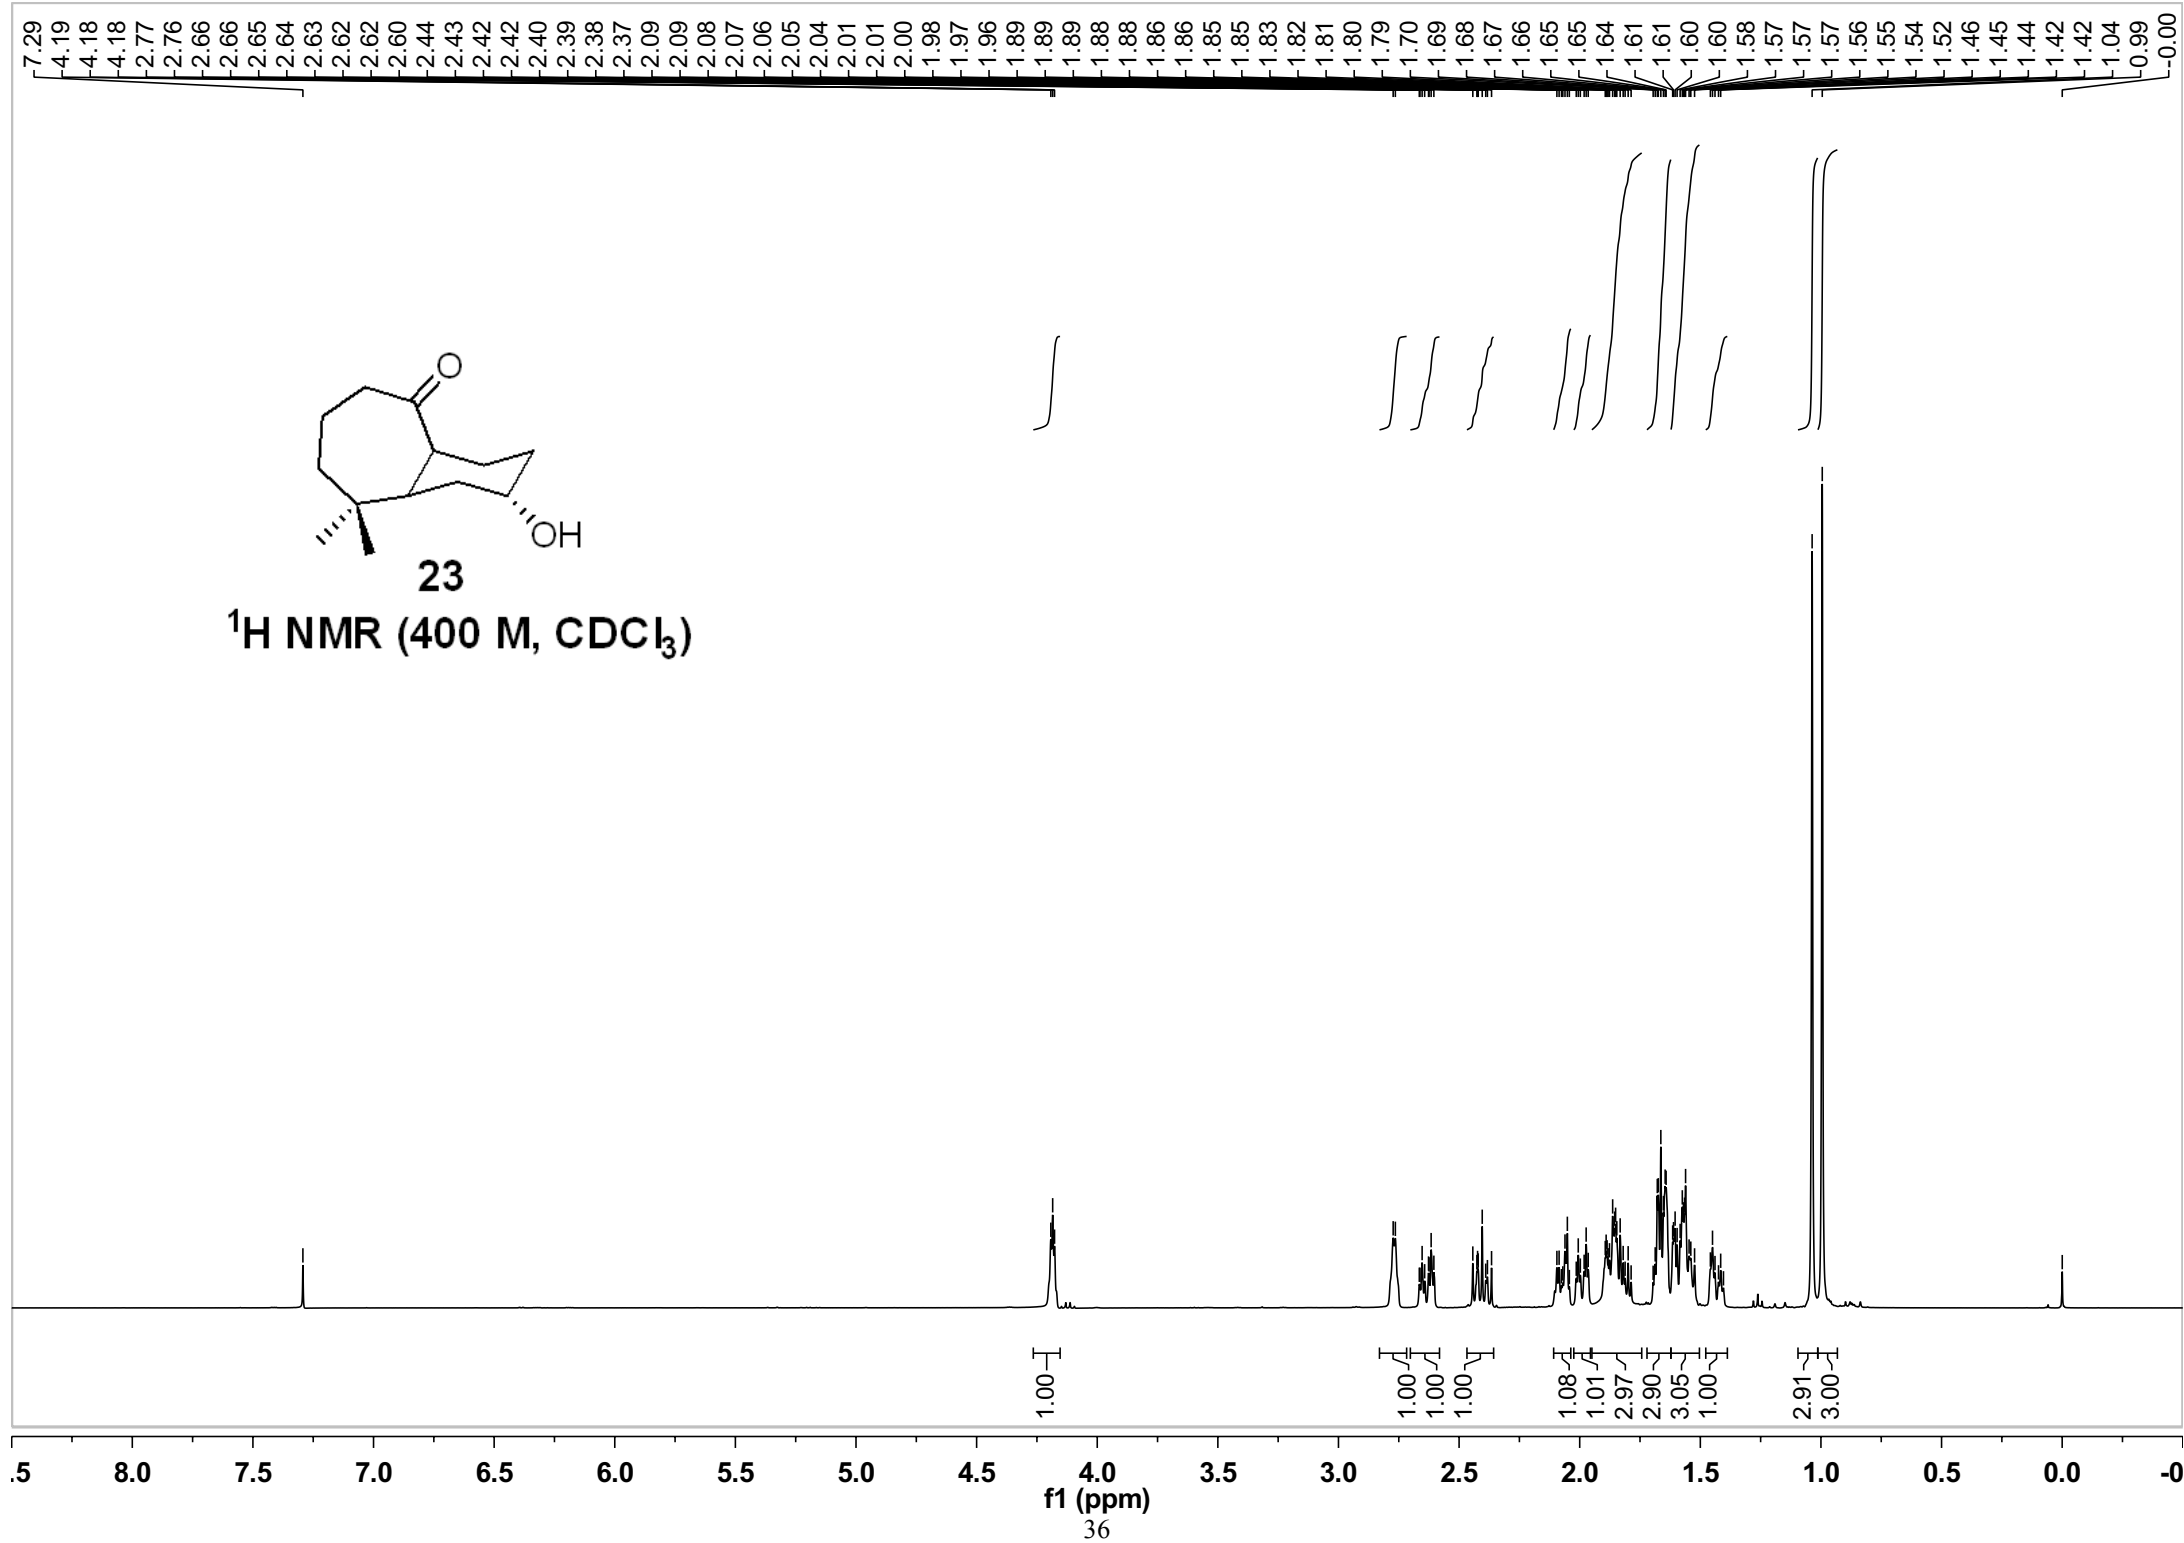

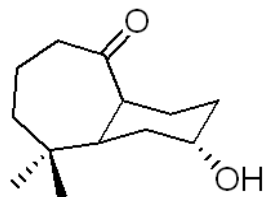

**23**

$^{13}\text{C}$  NMR (100M,  $\text{CDCl}_3$ )

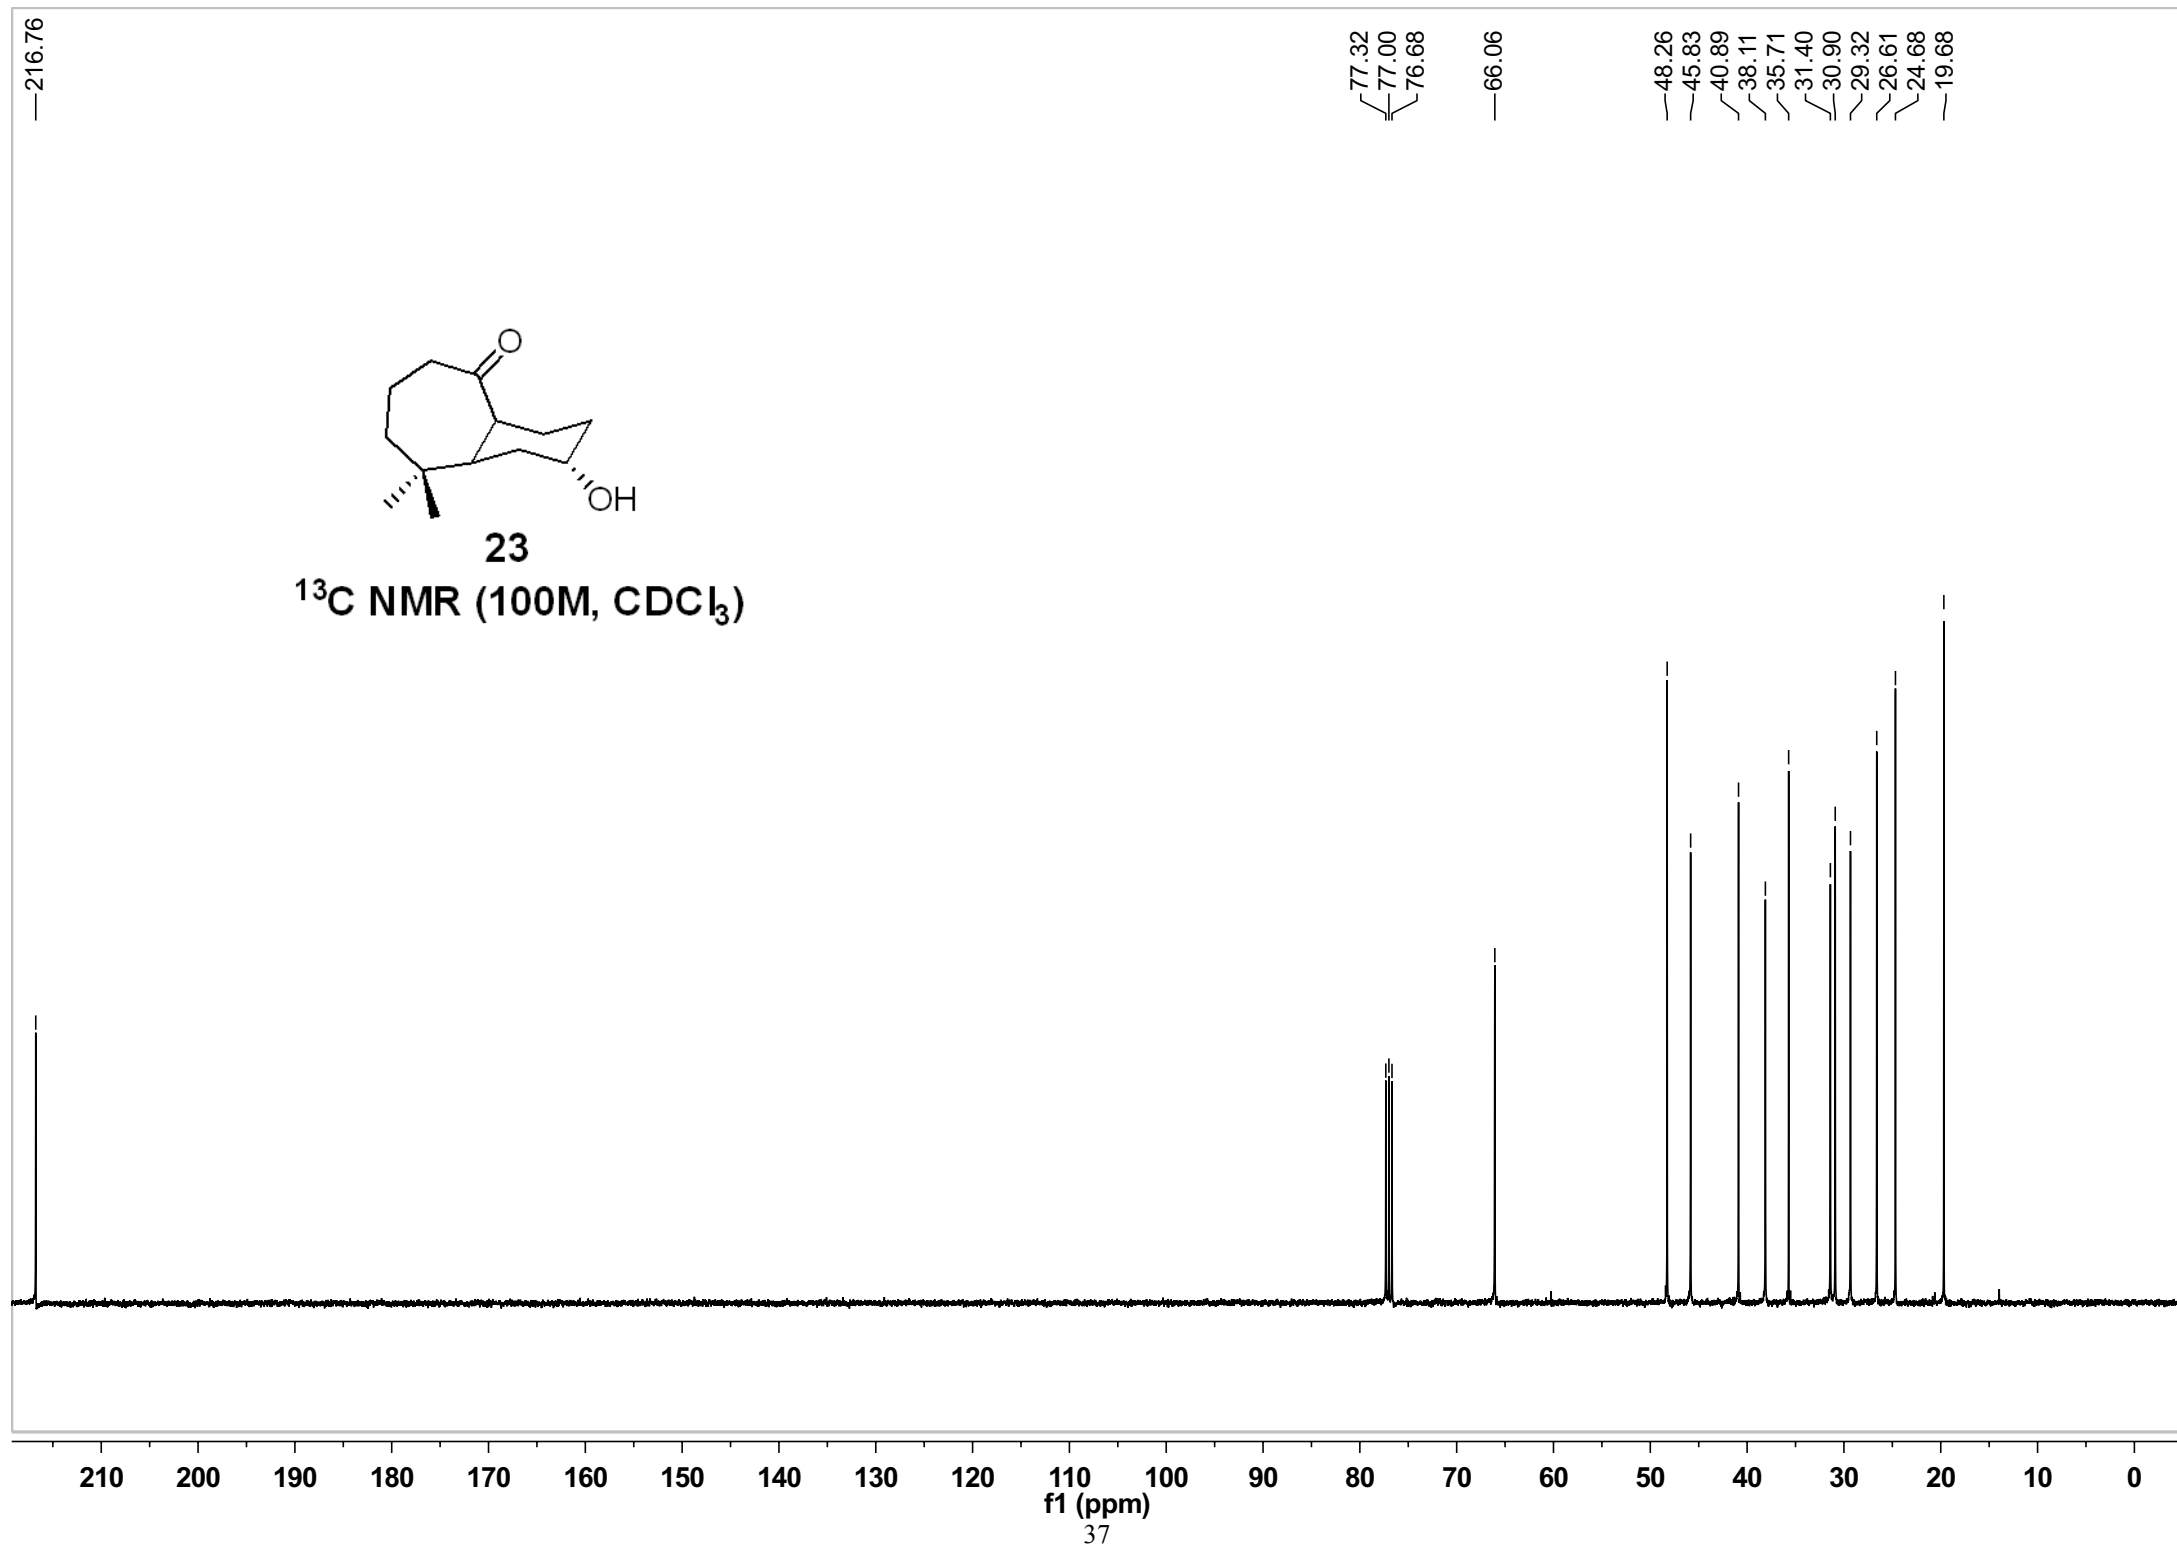



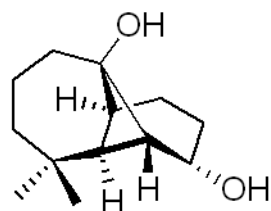

**14**

**$^{13}\text{C}$  NMR (100M, MeOD)**

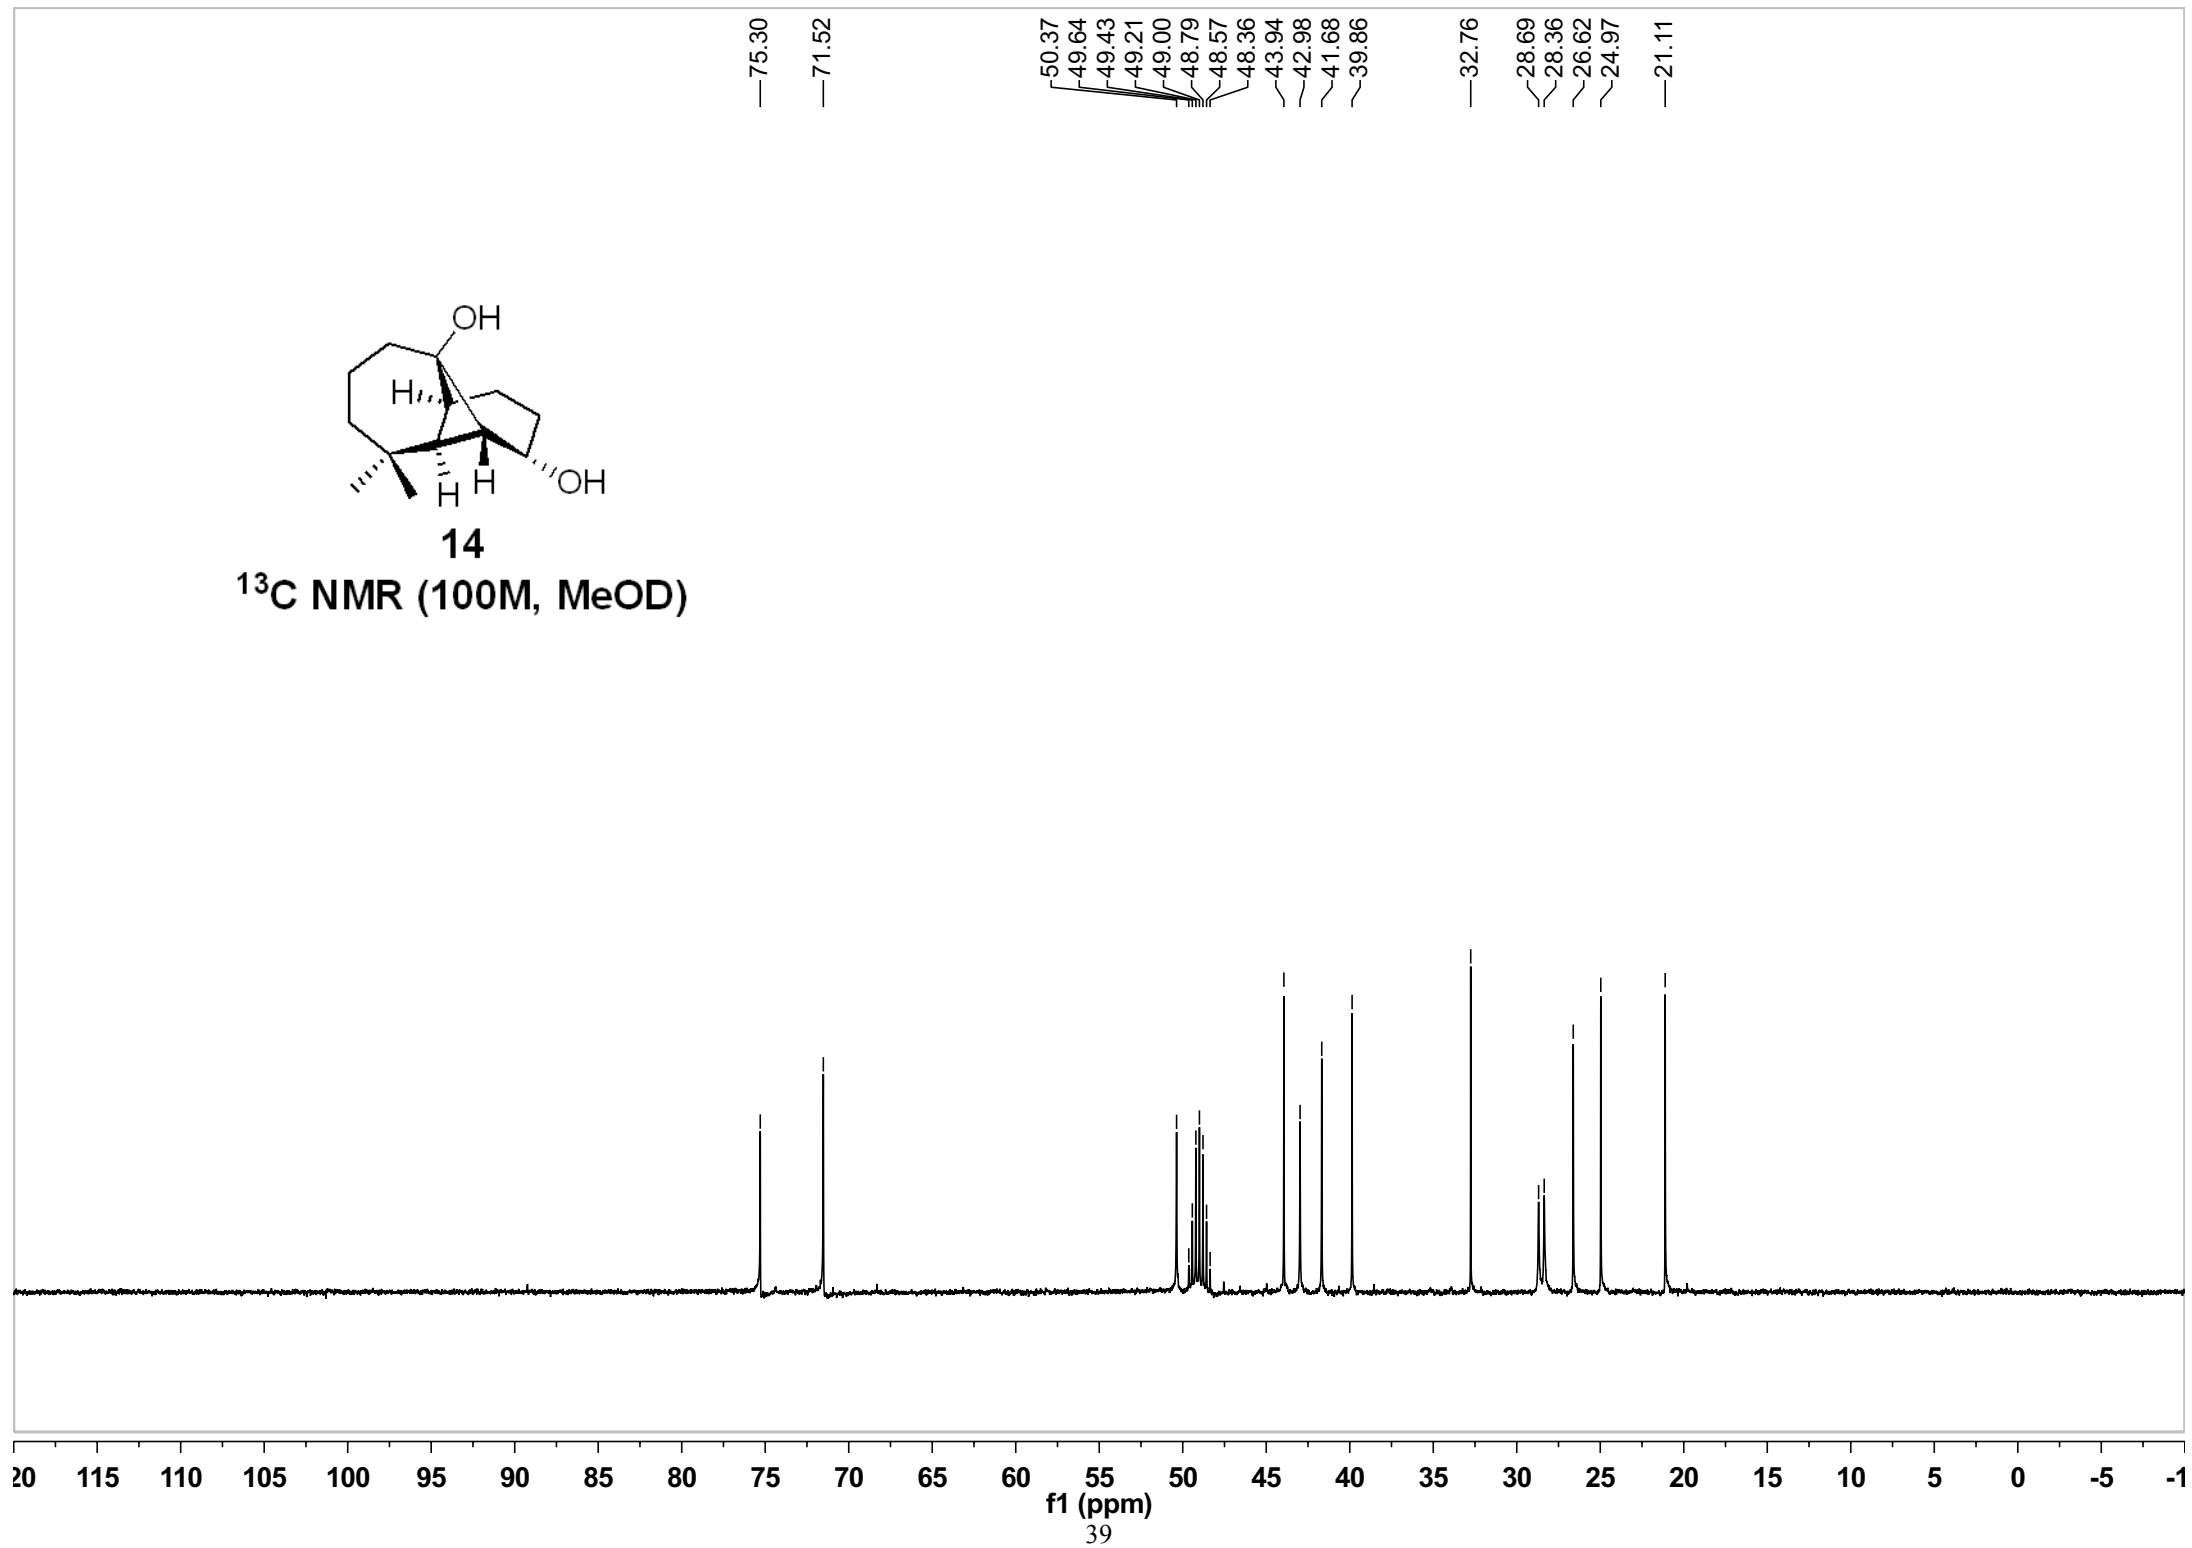

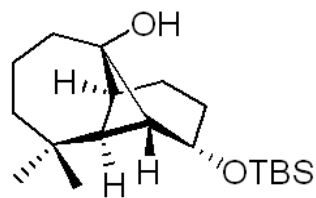

**S-3**  
 $^1\text{H}$  NMR (400 M,  $\text{CDCl}_3$ )

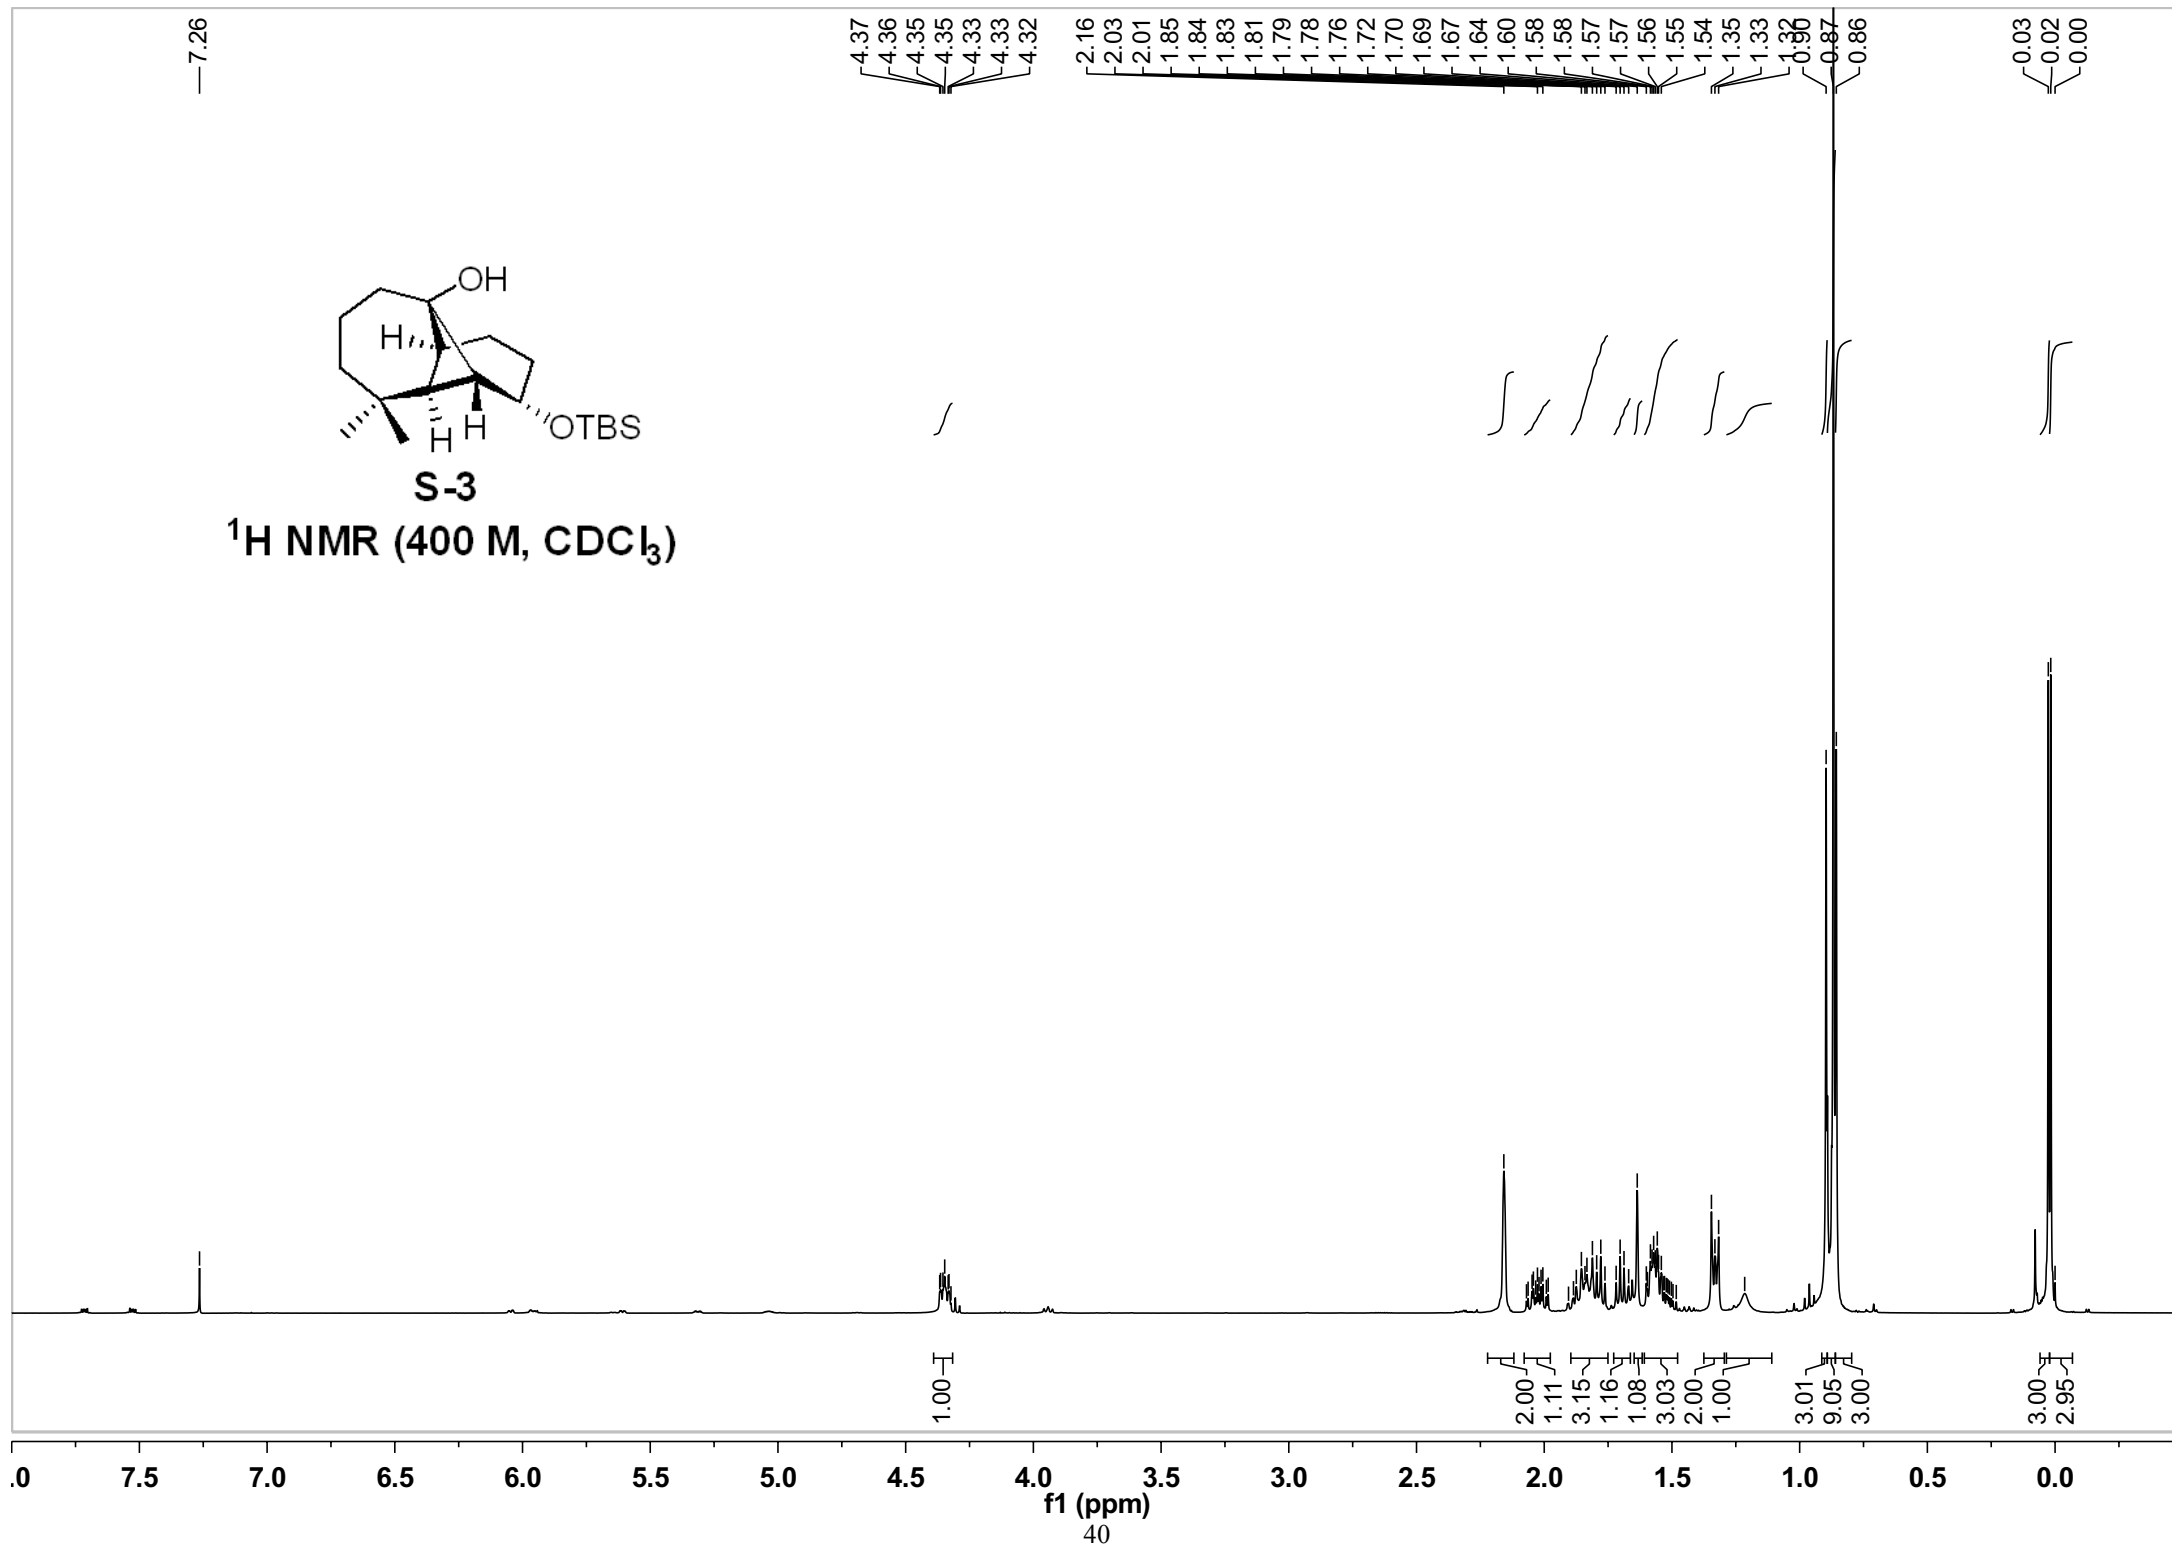



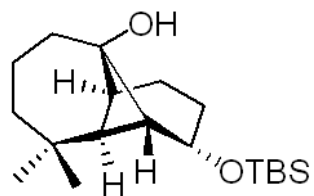

**S-3**

**$^{13}\text{C}$  NMR (100M,  $\text{CDCl}_3$ )**

77.32  
77.00  
76.68  
74.84  
71.09

50.12

42.76  
41.77  
41.08  
38.53

31.84

27.93  
26.99  
25.85  
24.11

20.03  
17.98

4.52  
4.68

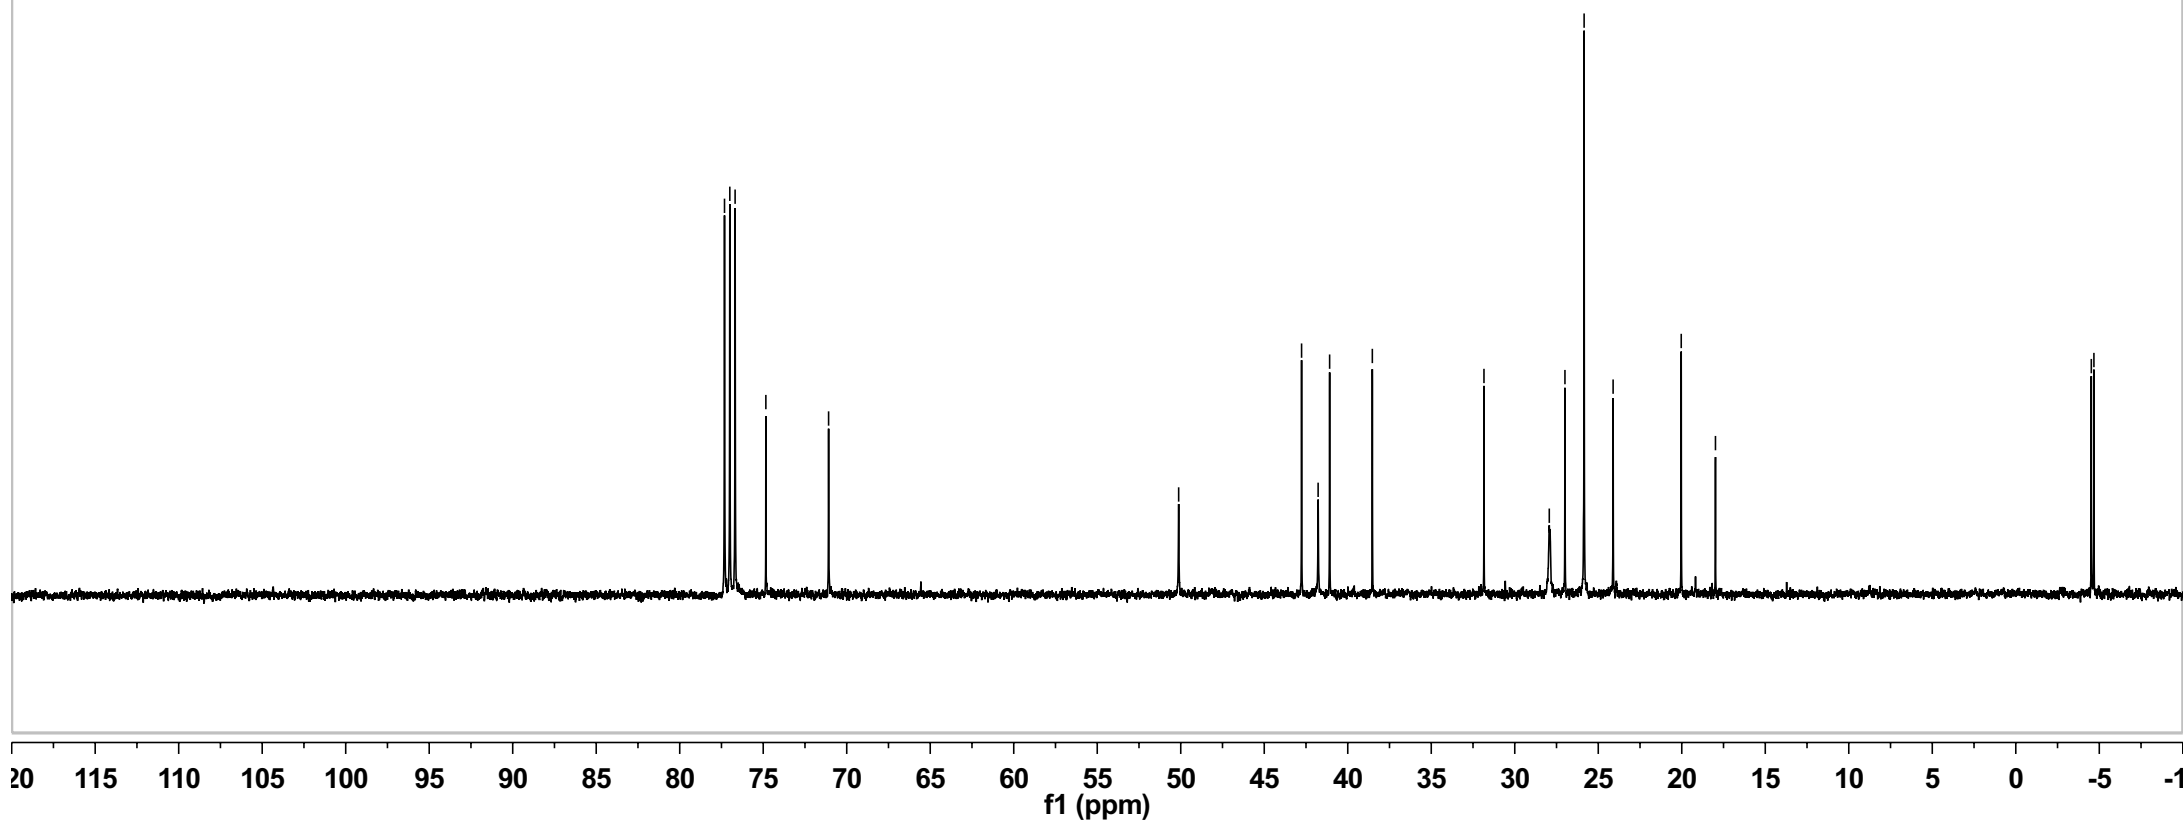

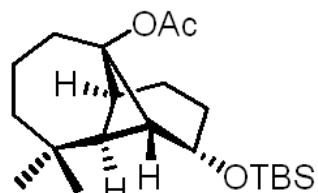

**S-4**

**$^1\text{H}$  NMR (400 M,  $\text{CDCl}_3$ )**

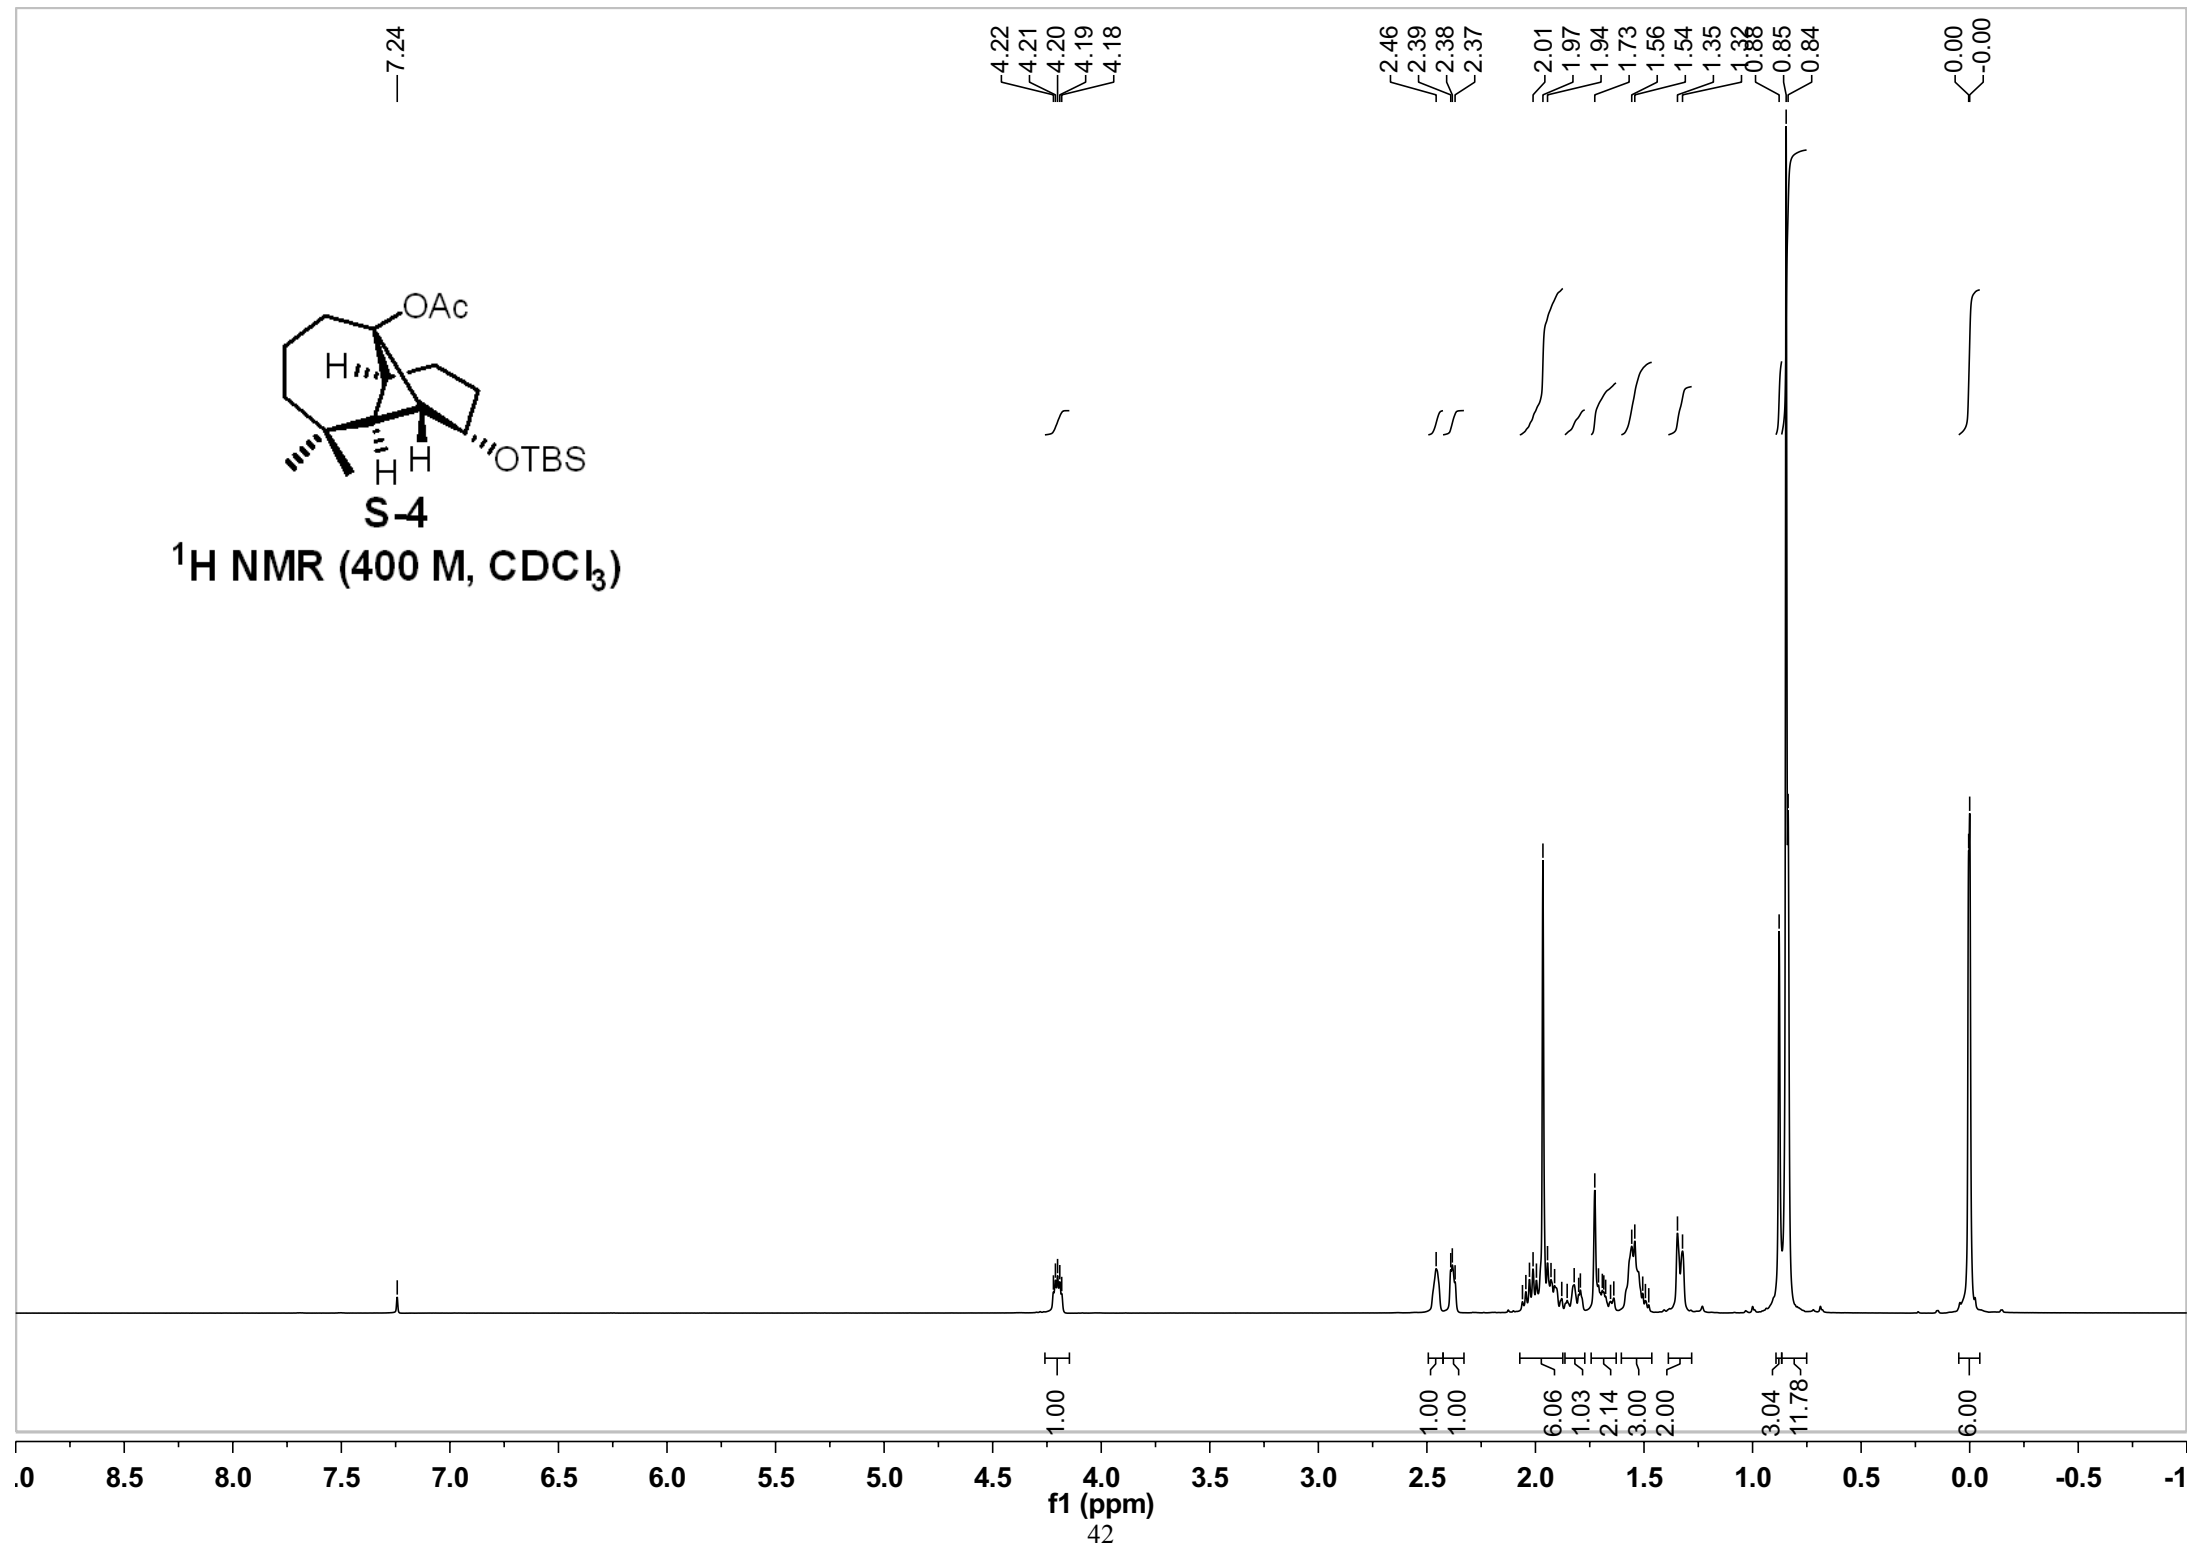

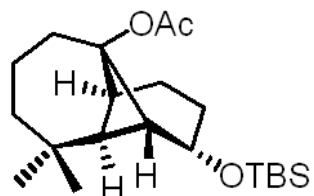

**S-4**

$^{13}\text{C}$  NMR (100M,  $\text{CDCl}_3$ )

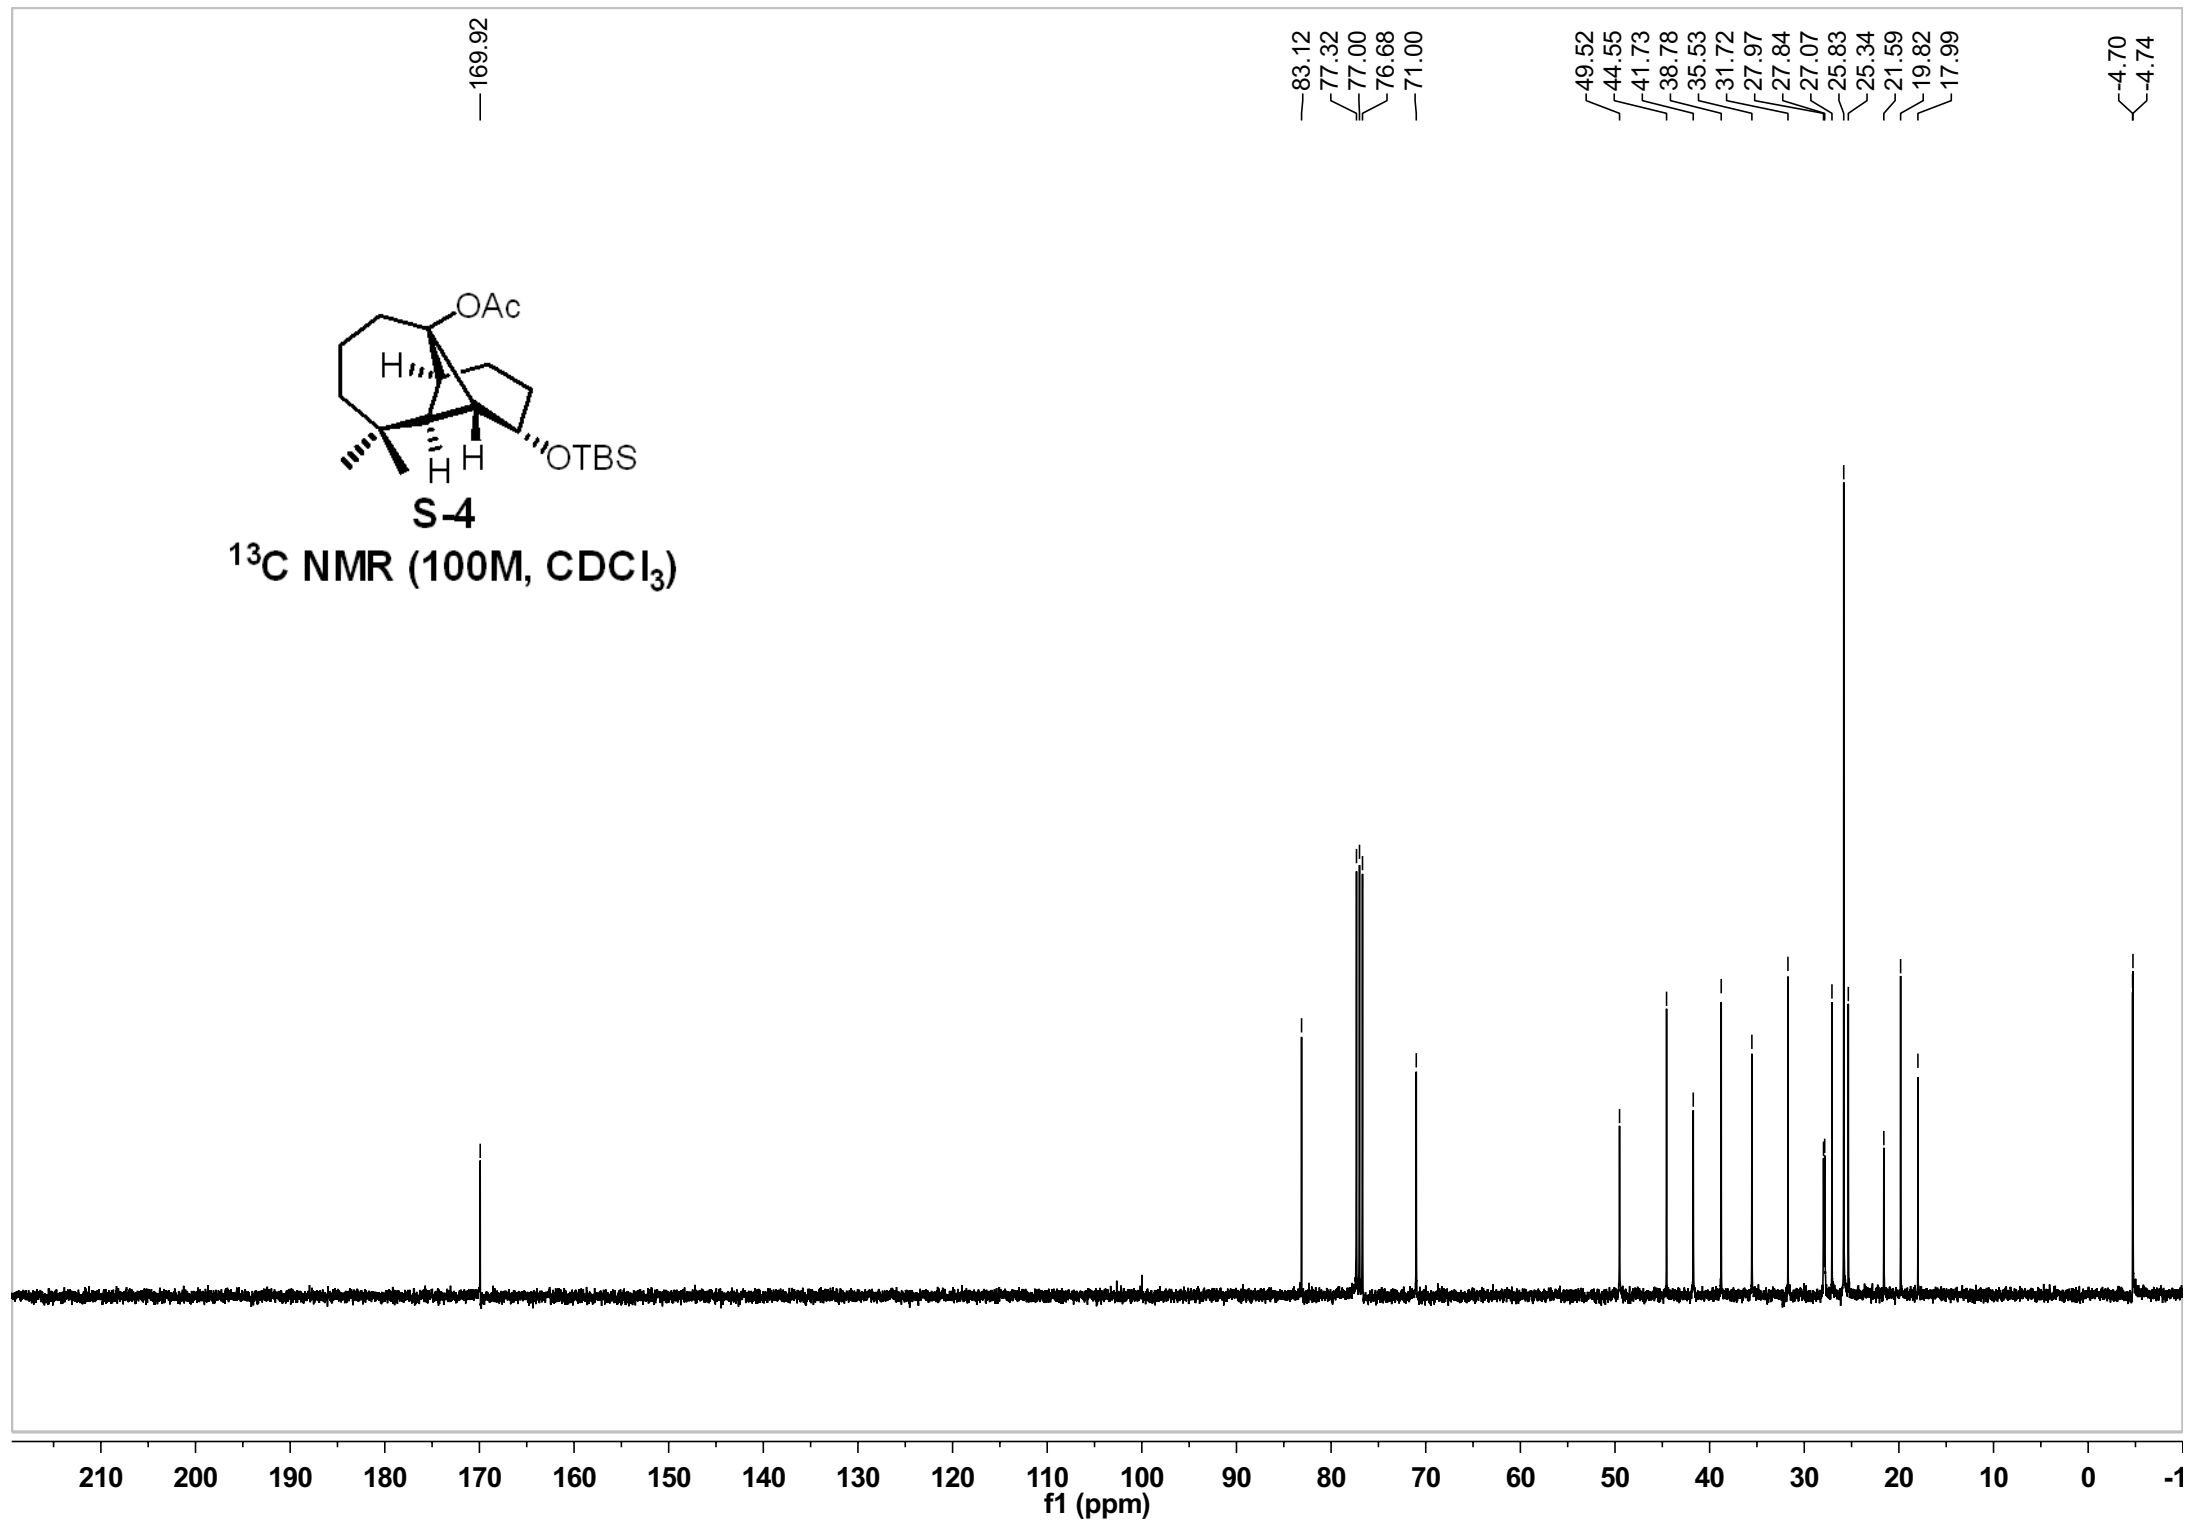

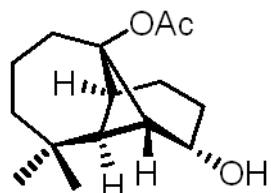

**24**

**$^1\text{H}$  NMR (400 M,  $\text{CDCl}_3$ )**

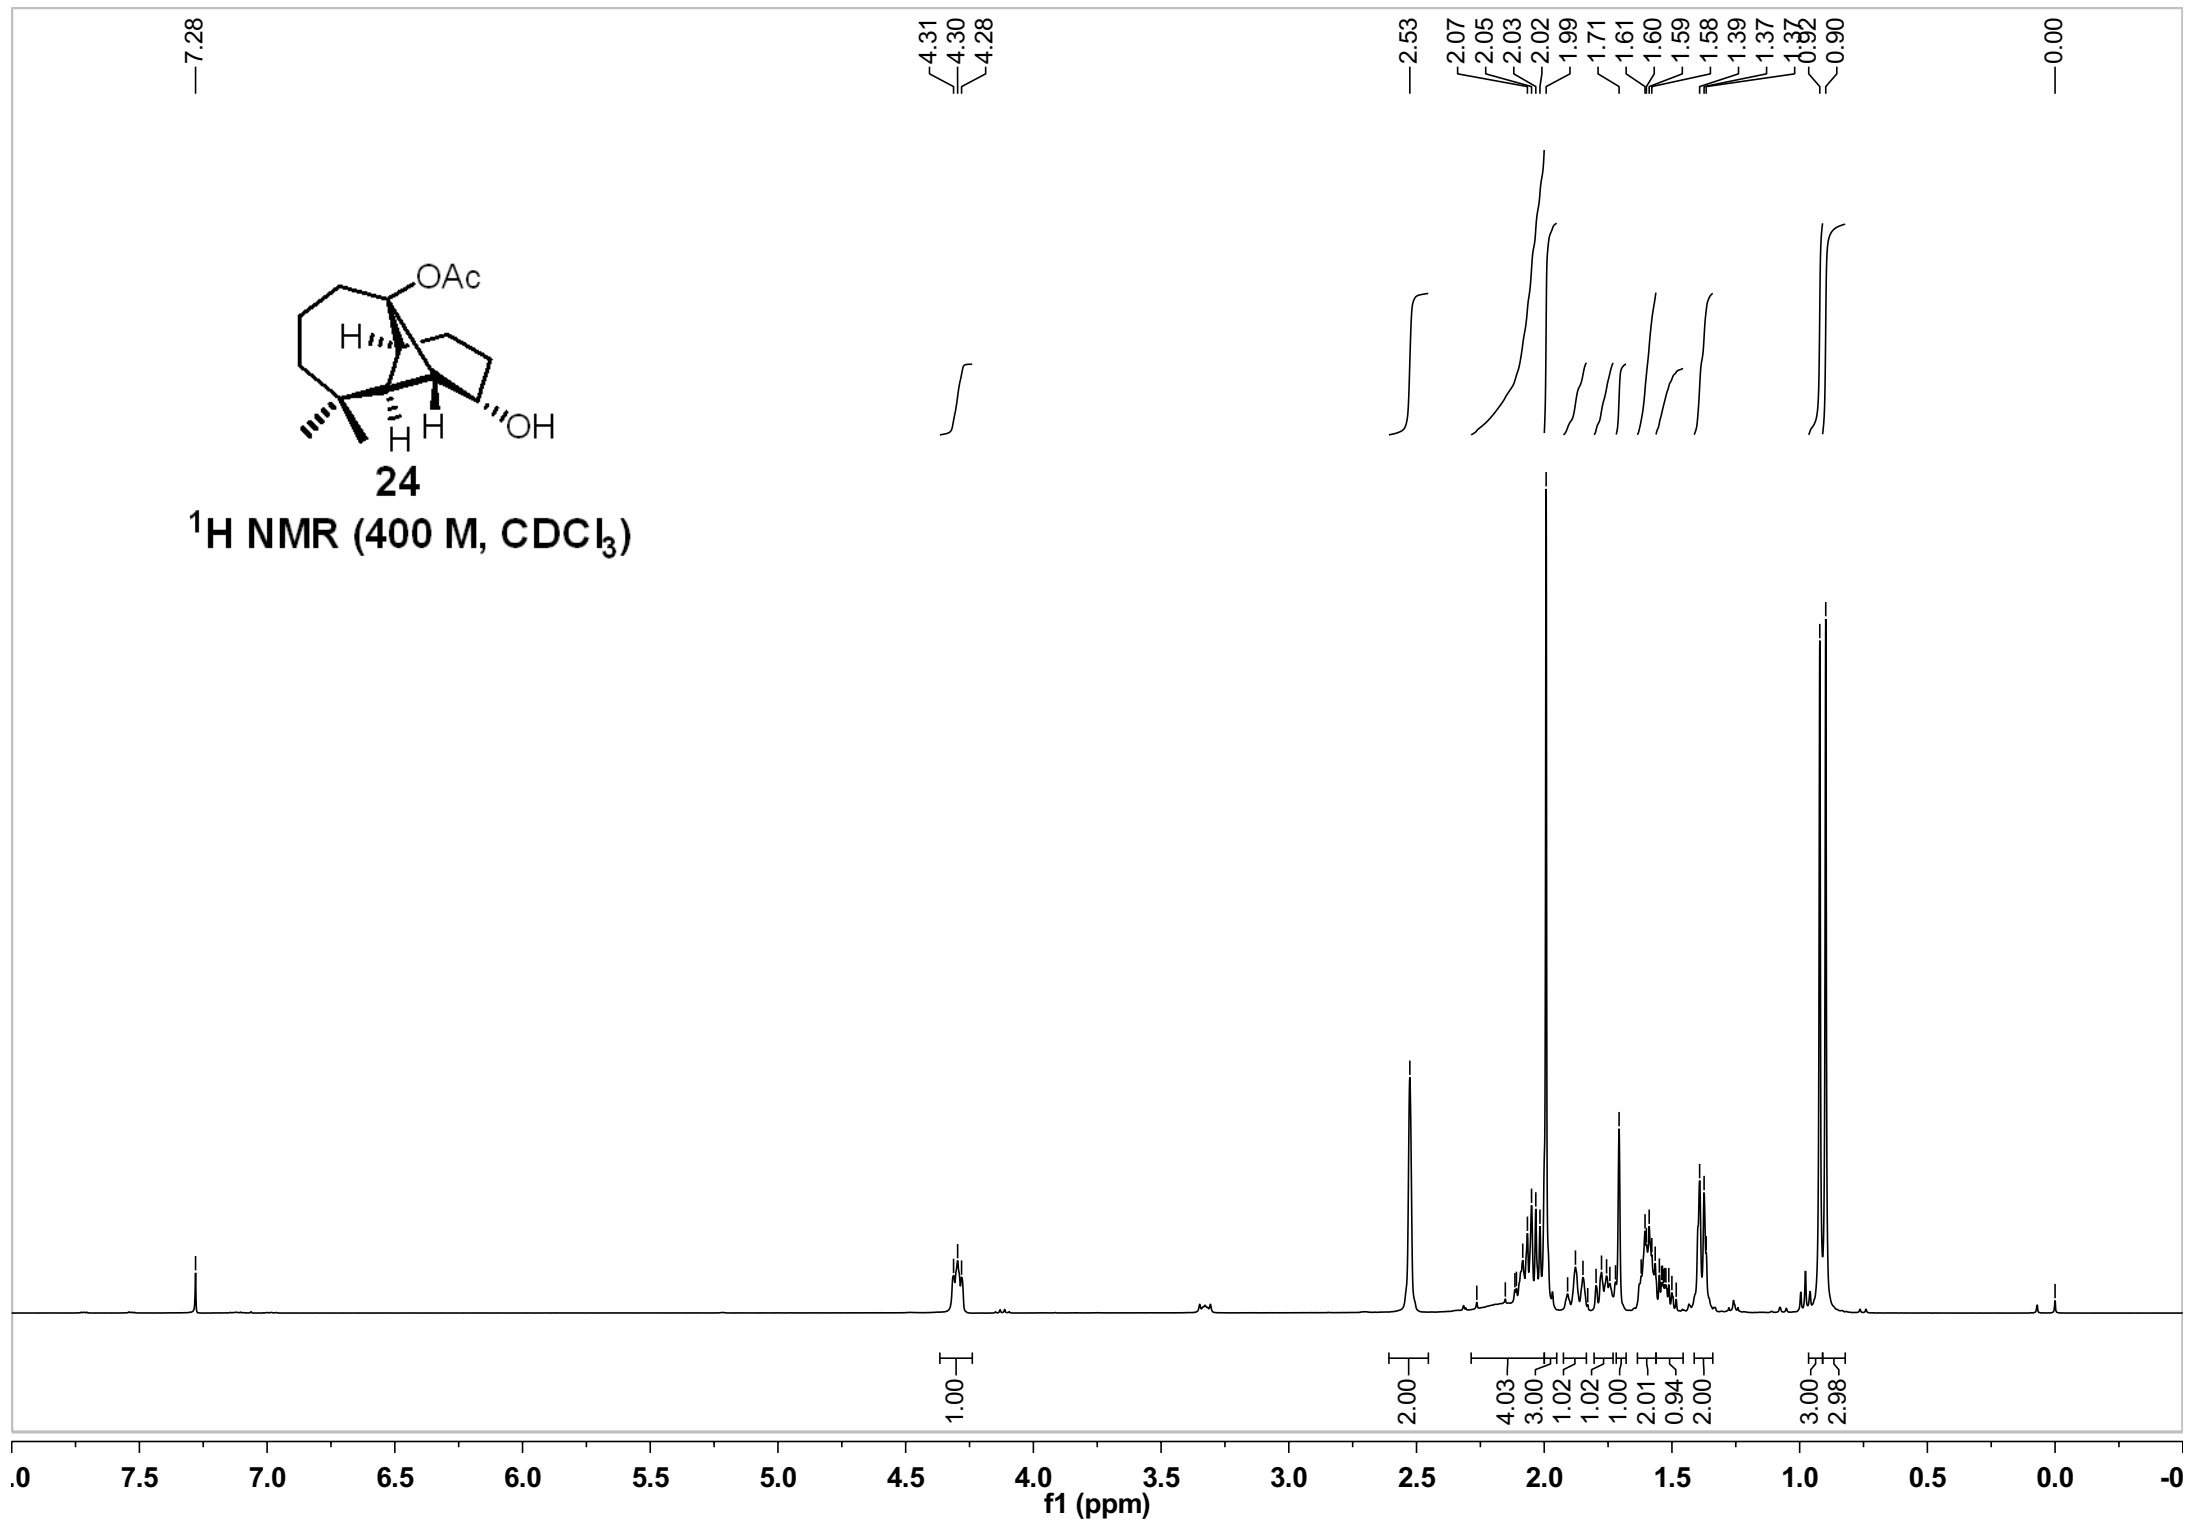

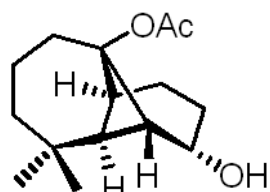

24

$^{13}\text{C}$  NMR (100M,  $\text{CDCl}_3$ )

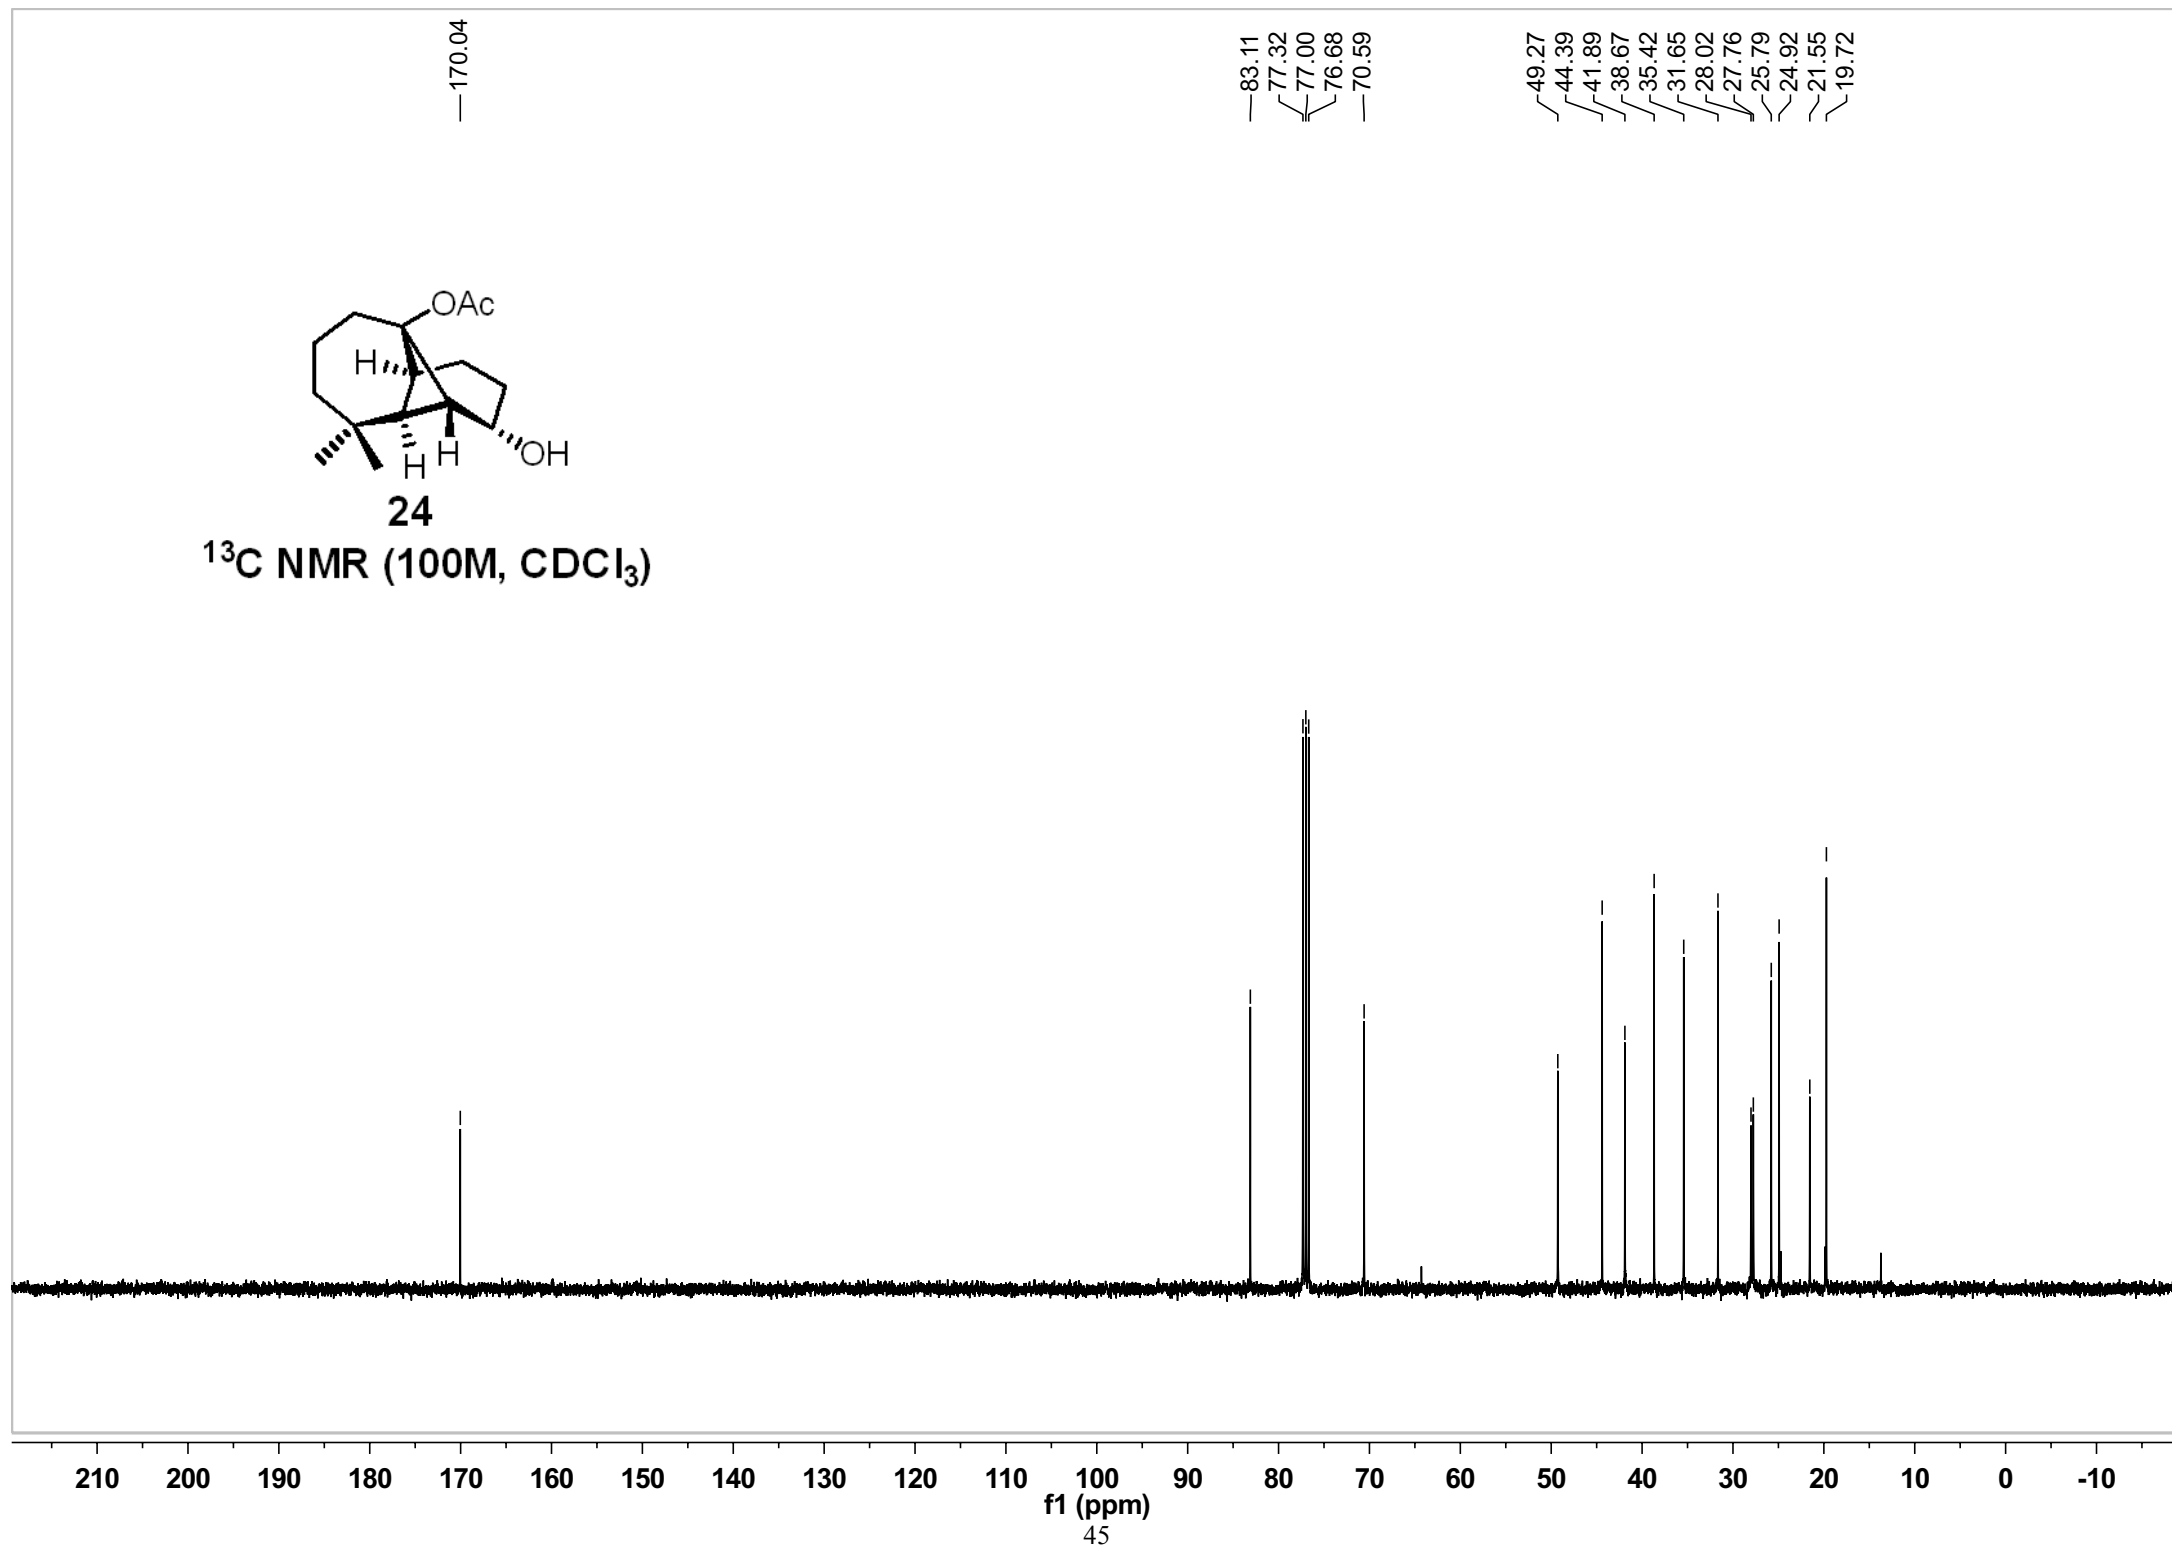

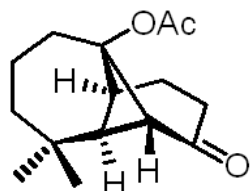

**25**

**$^1\text{H}$  NMR (400 M,  $\text{CDCl}_3$ )**

7.26  
3.08  
3.07  
2.86  
2.45  
2.30  
2.27  
2.25  
2.24  
1.89  
1.87  
1.59  
1.57  
1.53  
1.41  
1.37  
1.34  
0.88  
0.83  
0.00

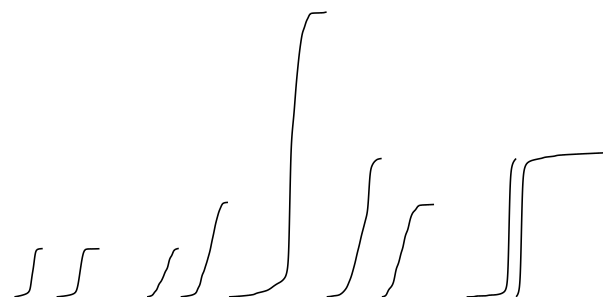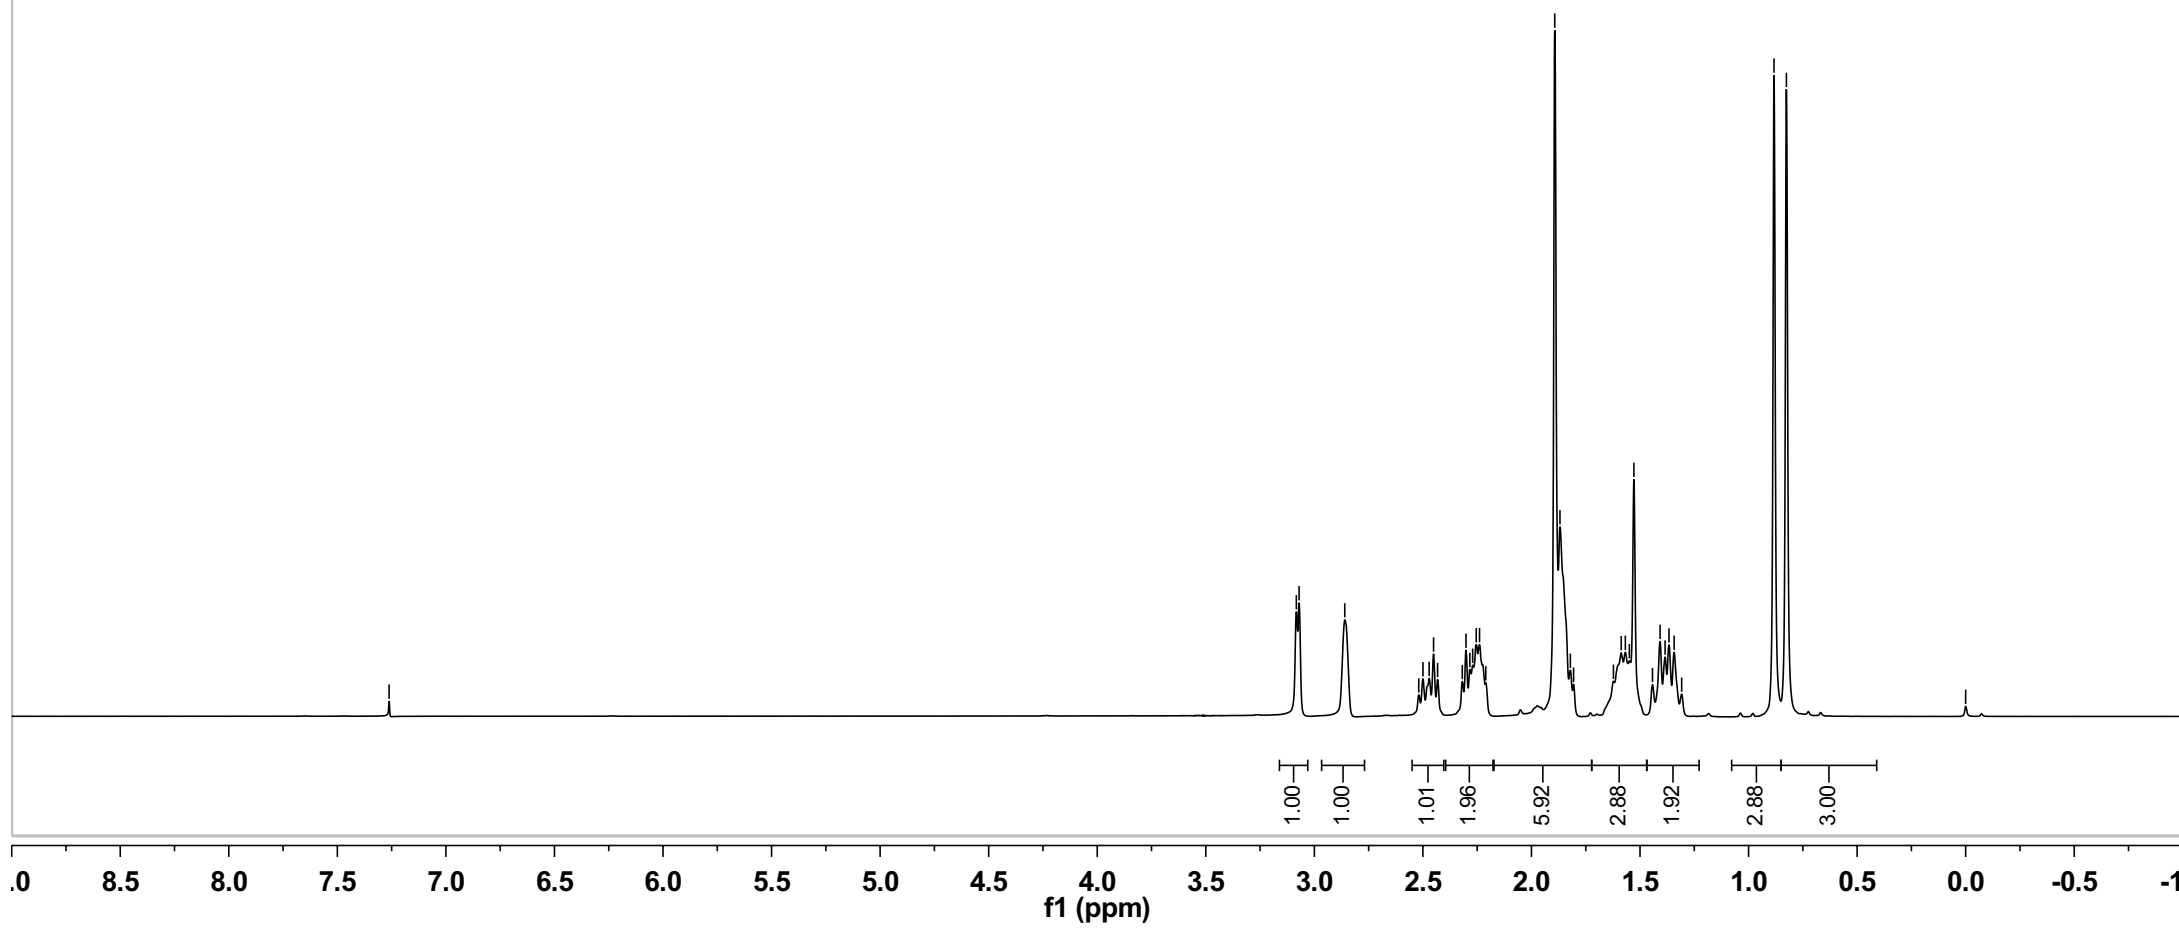

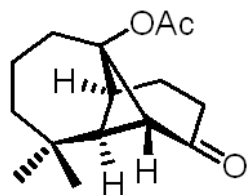

**25**

$^{13}\text{C}$  NMR (100M,  $\text{CDCl}_3$ )

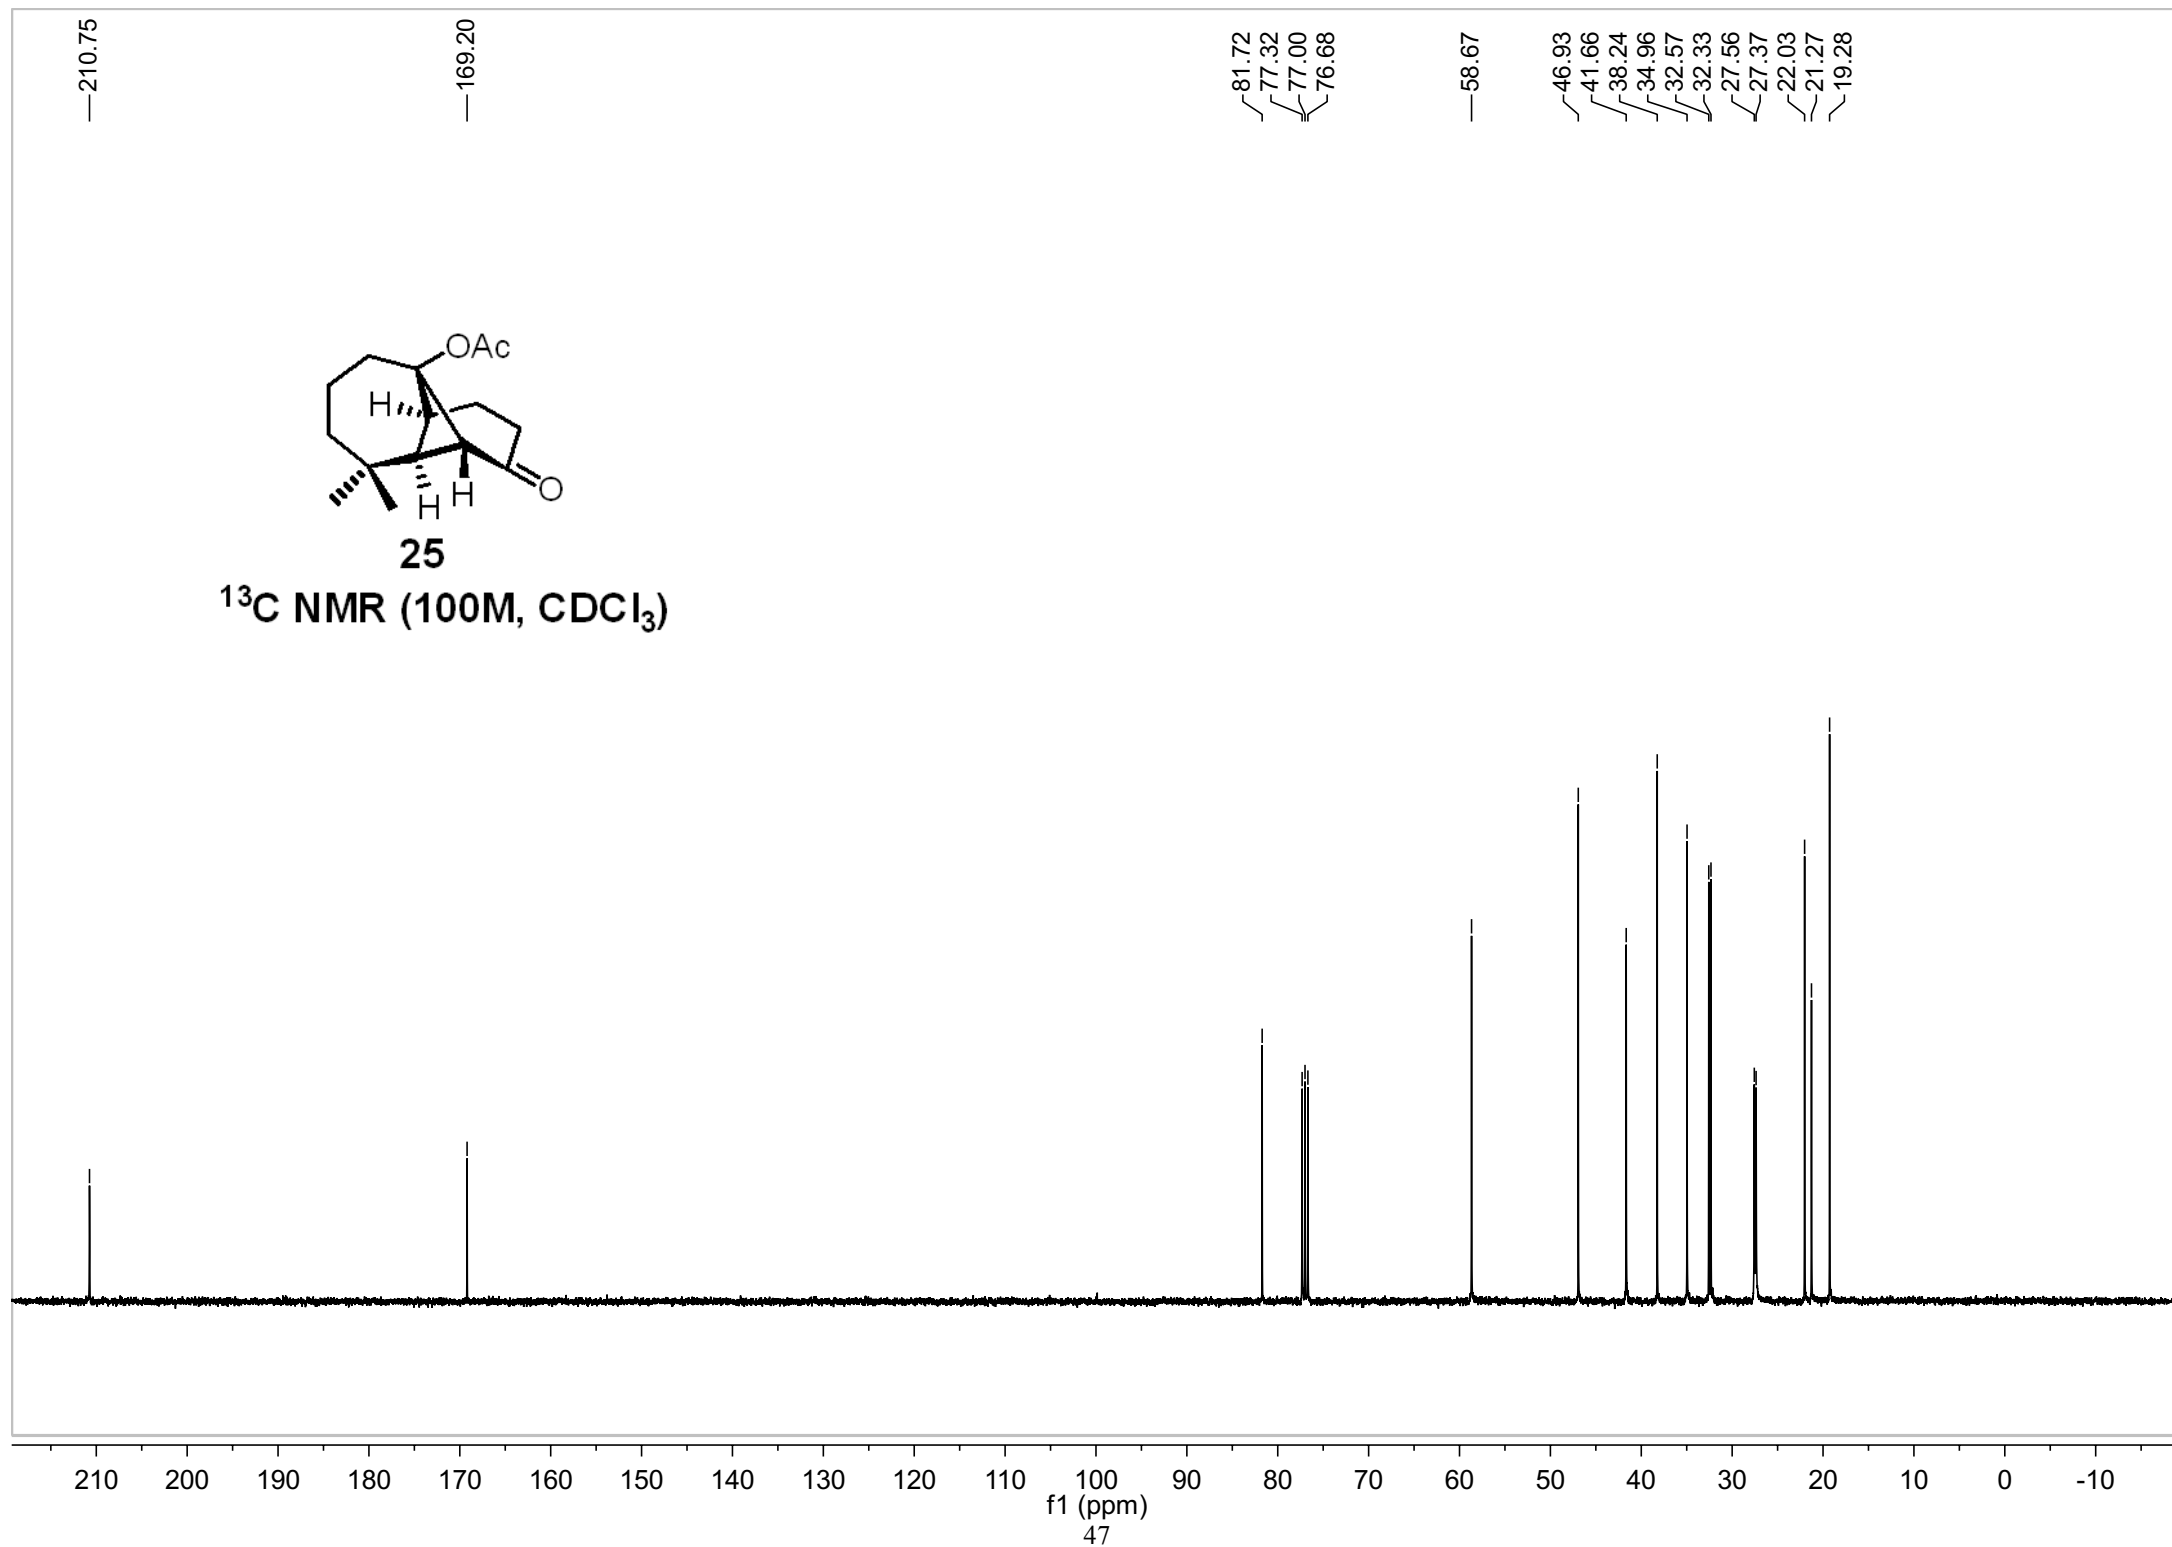

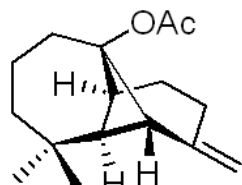

26

$^1\text{H}$  NMR (400 M,  $\text{CDCl}_3$ )

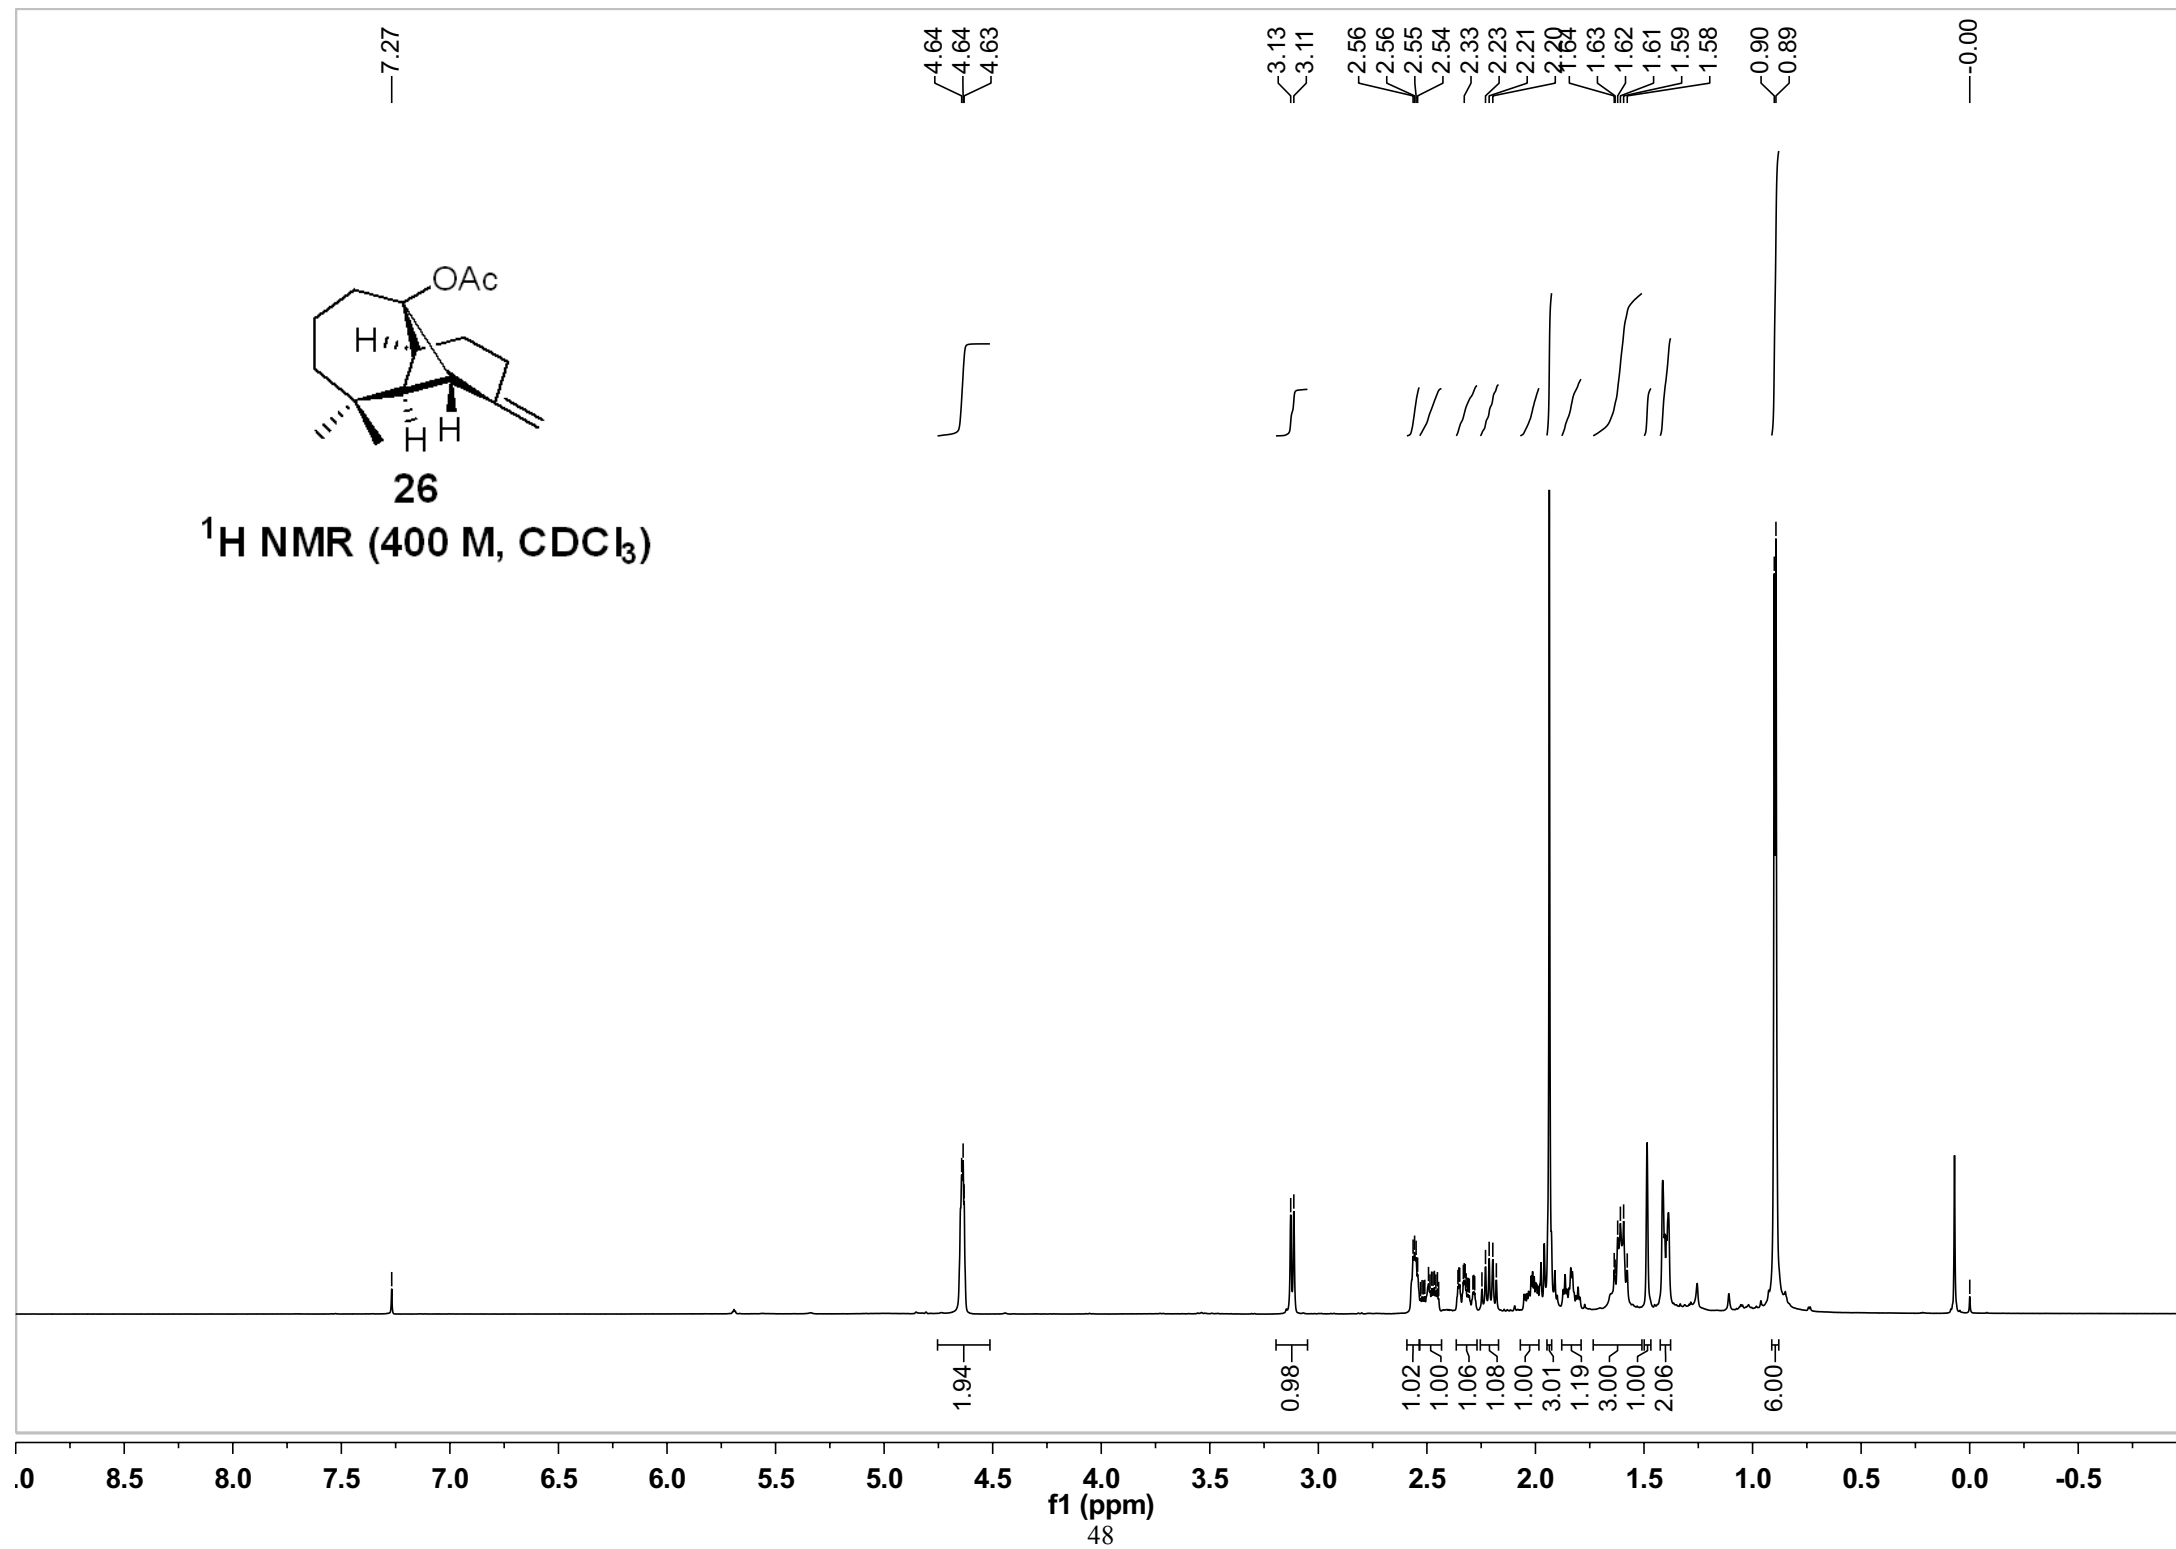



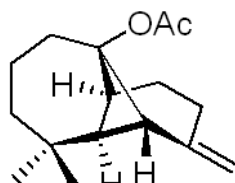

26

$^{13}\text{C}$  NMR (100M,  $\text{CDCl}_3$ )

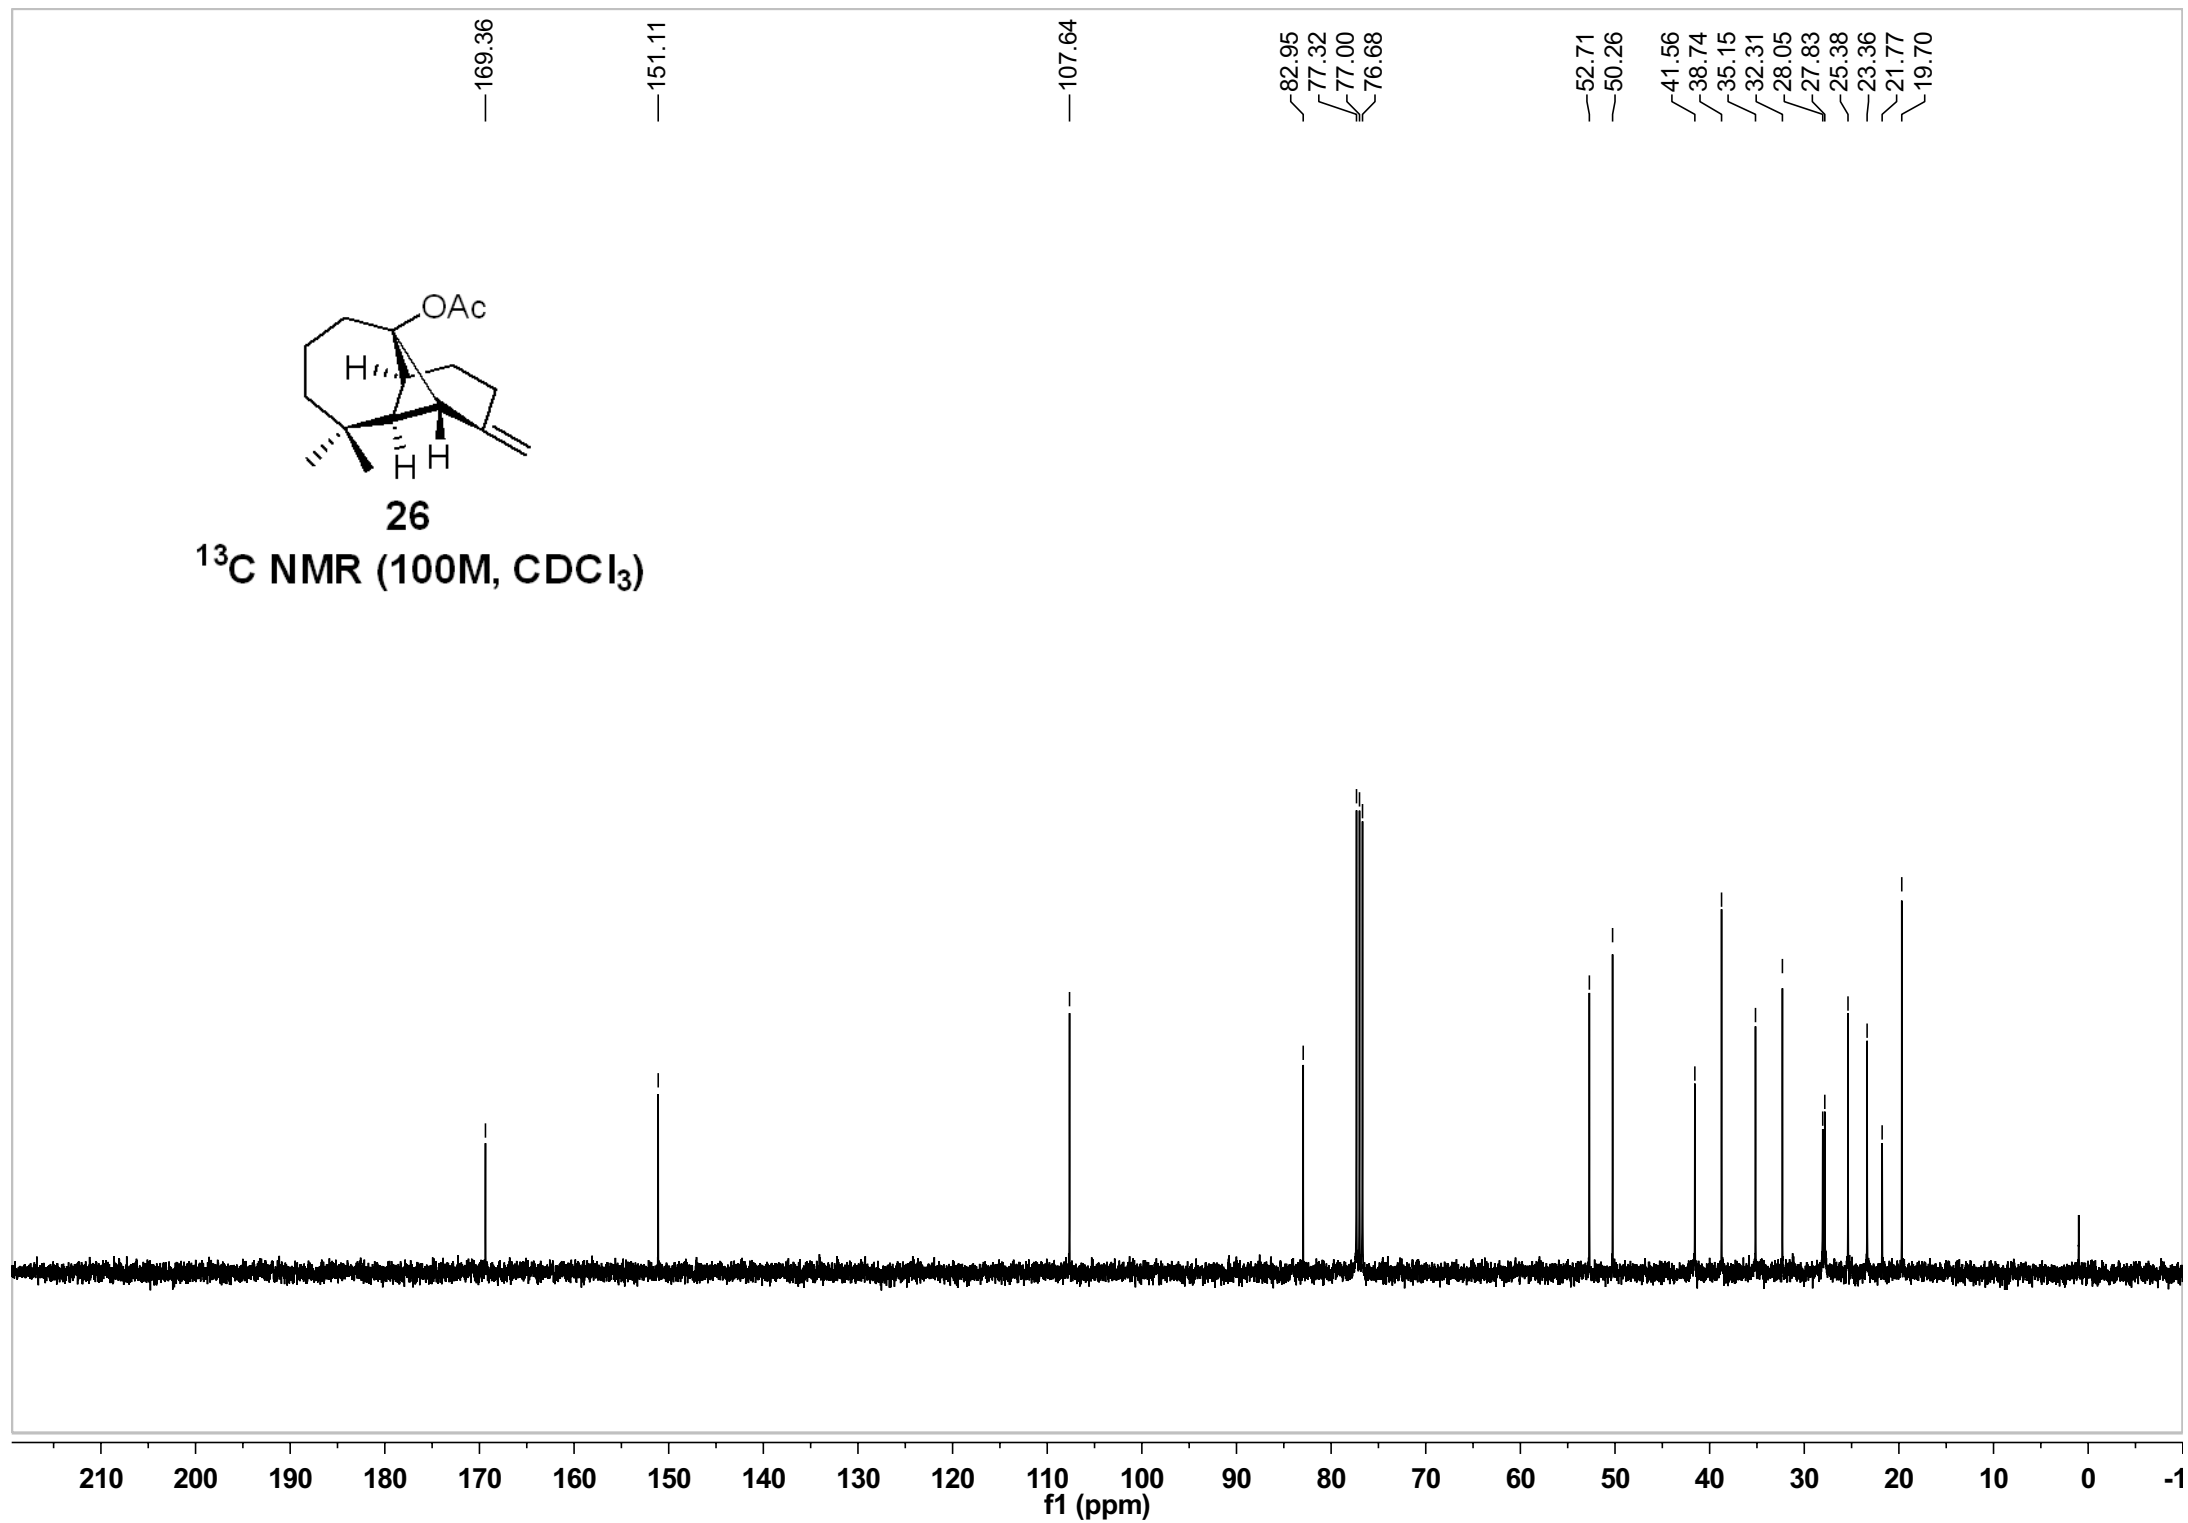

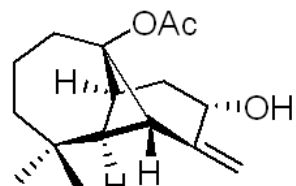

27

$^1\text{H}$  NMR (400 M,  $\text{CDCl}_3$ )

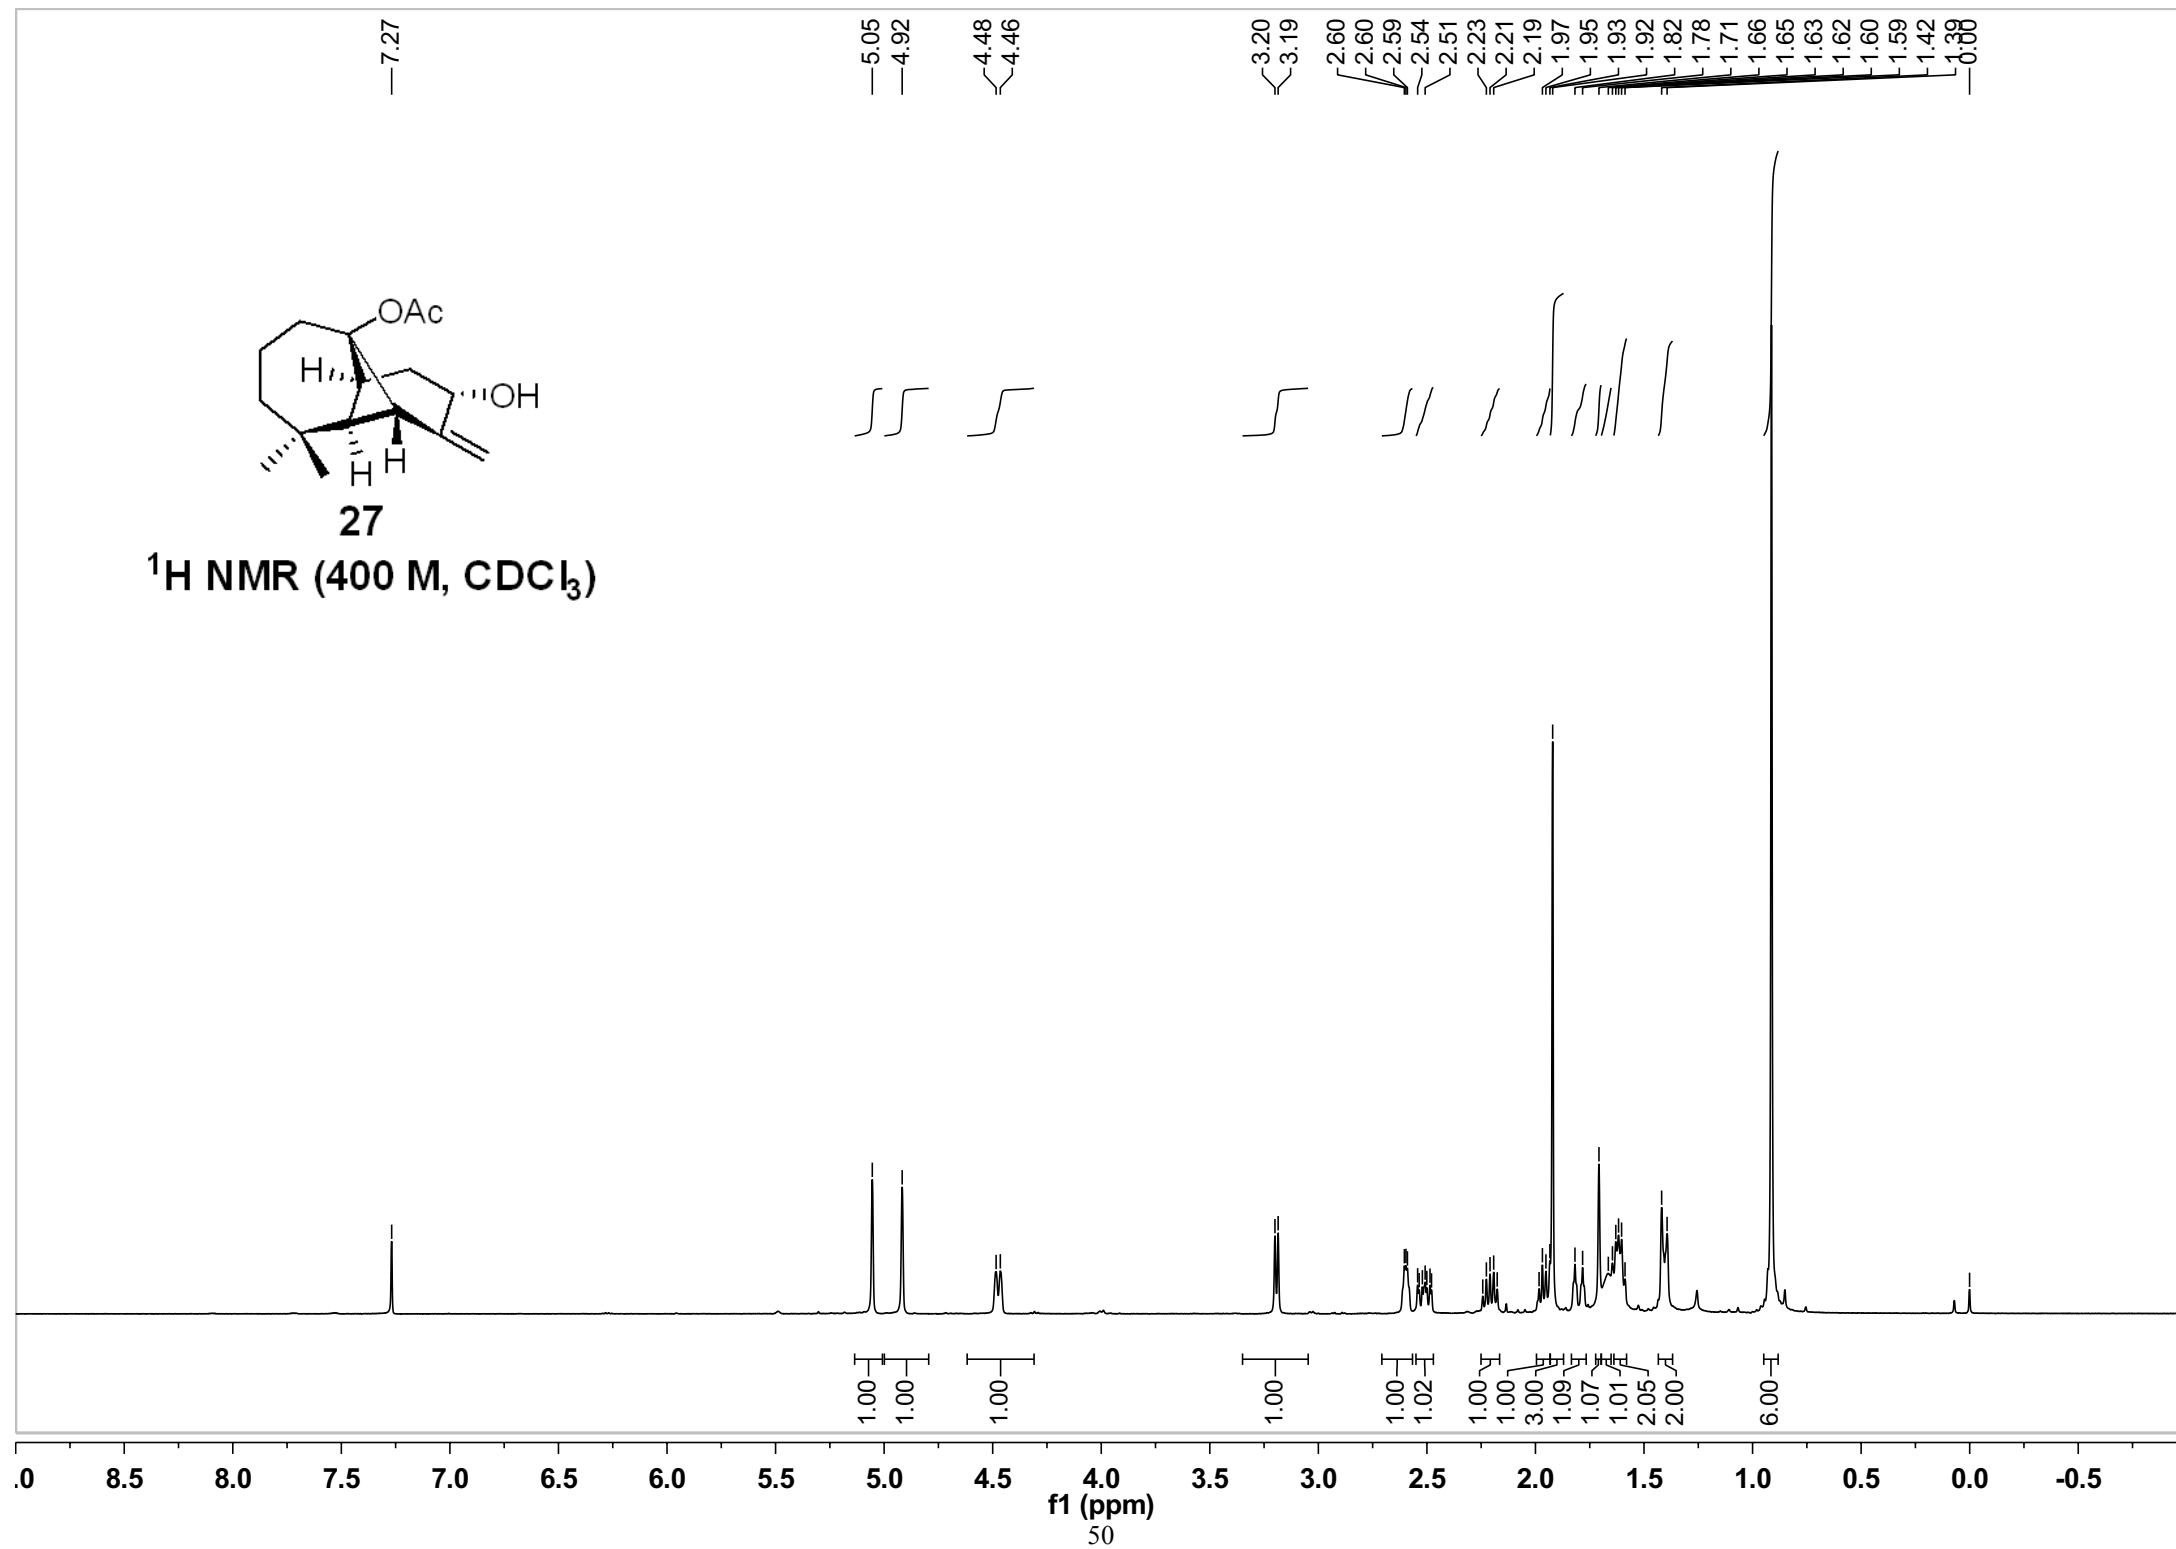

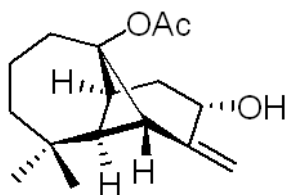

27

$^{13}\text{C}$  NMR (100M,  $\text{CDCl}_3$ )

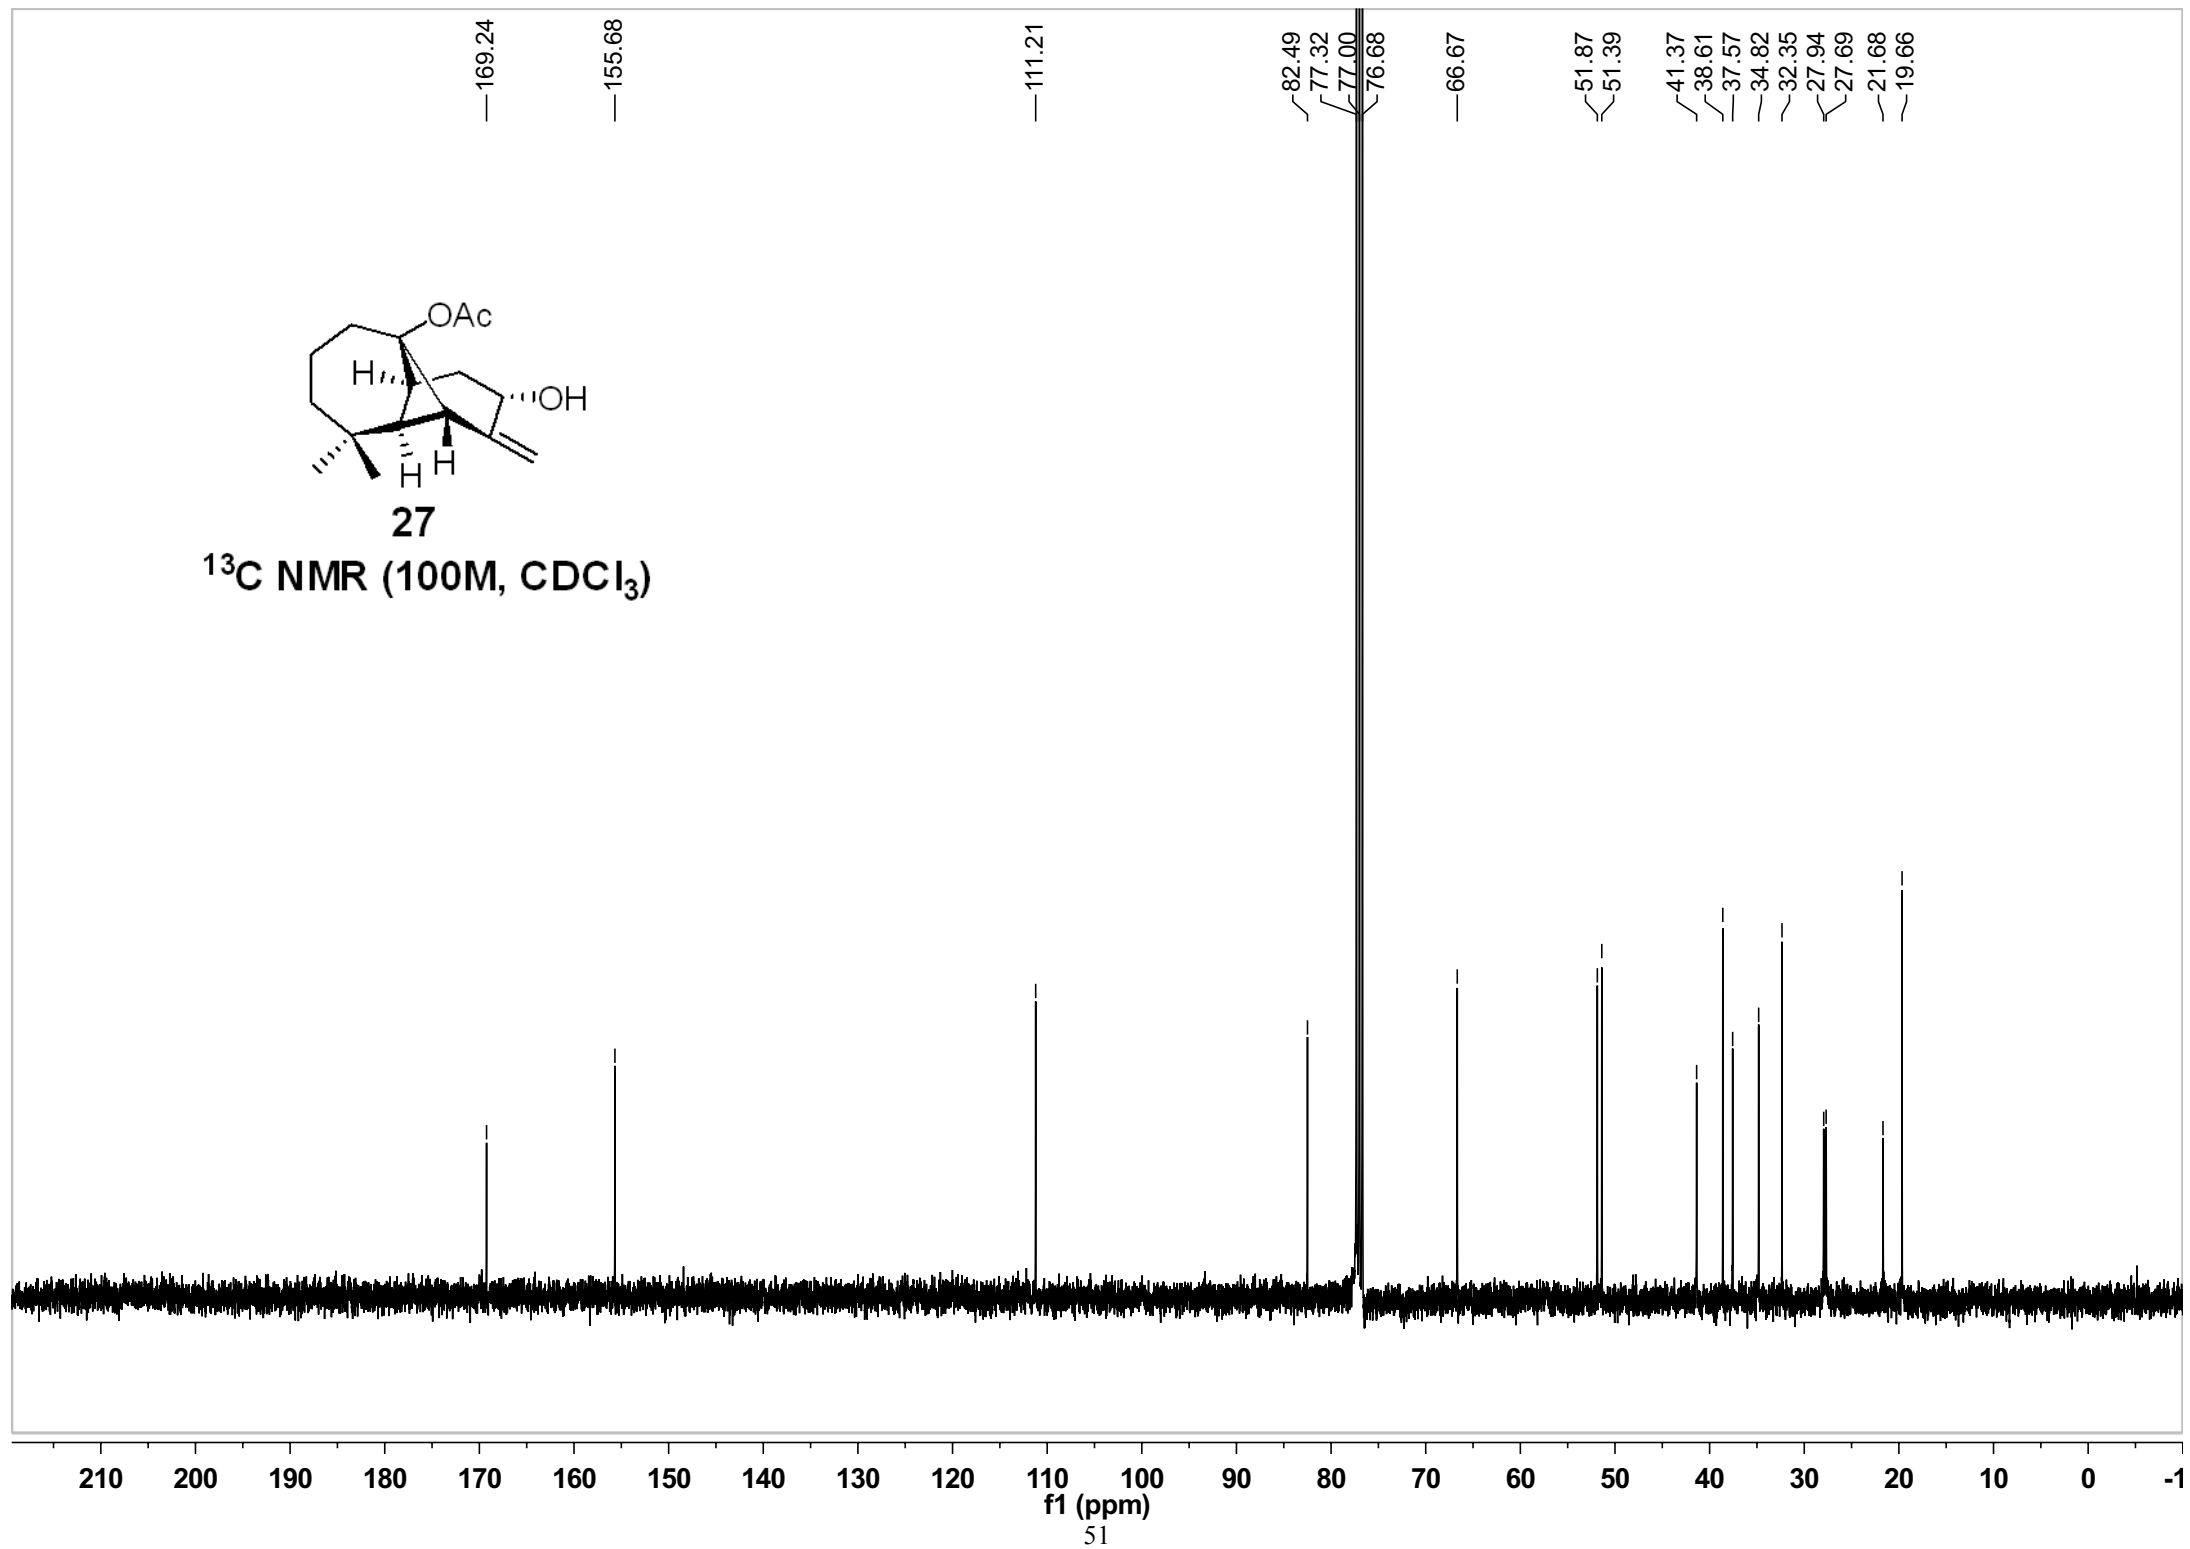

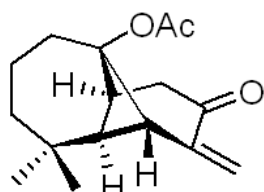

28

$^1\text{H}$  NMR (400 M,  $\text{CDCl}_3$ )

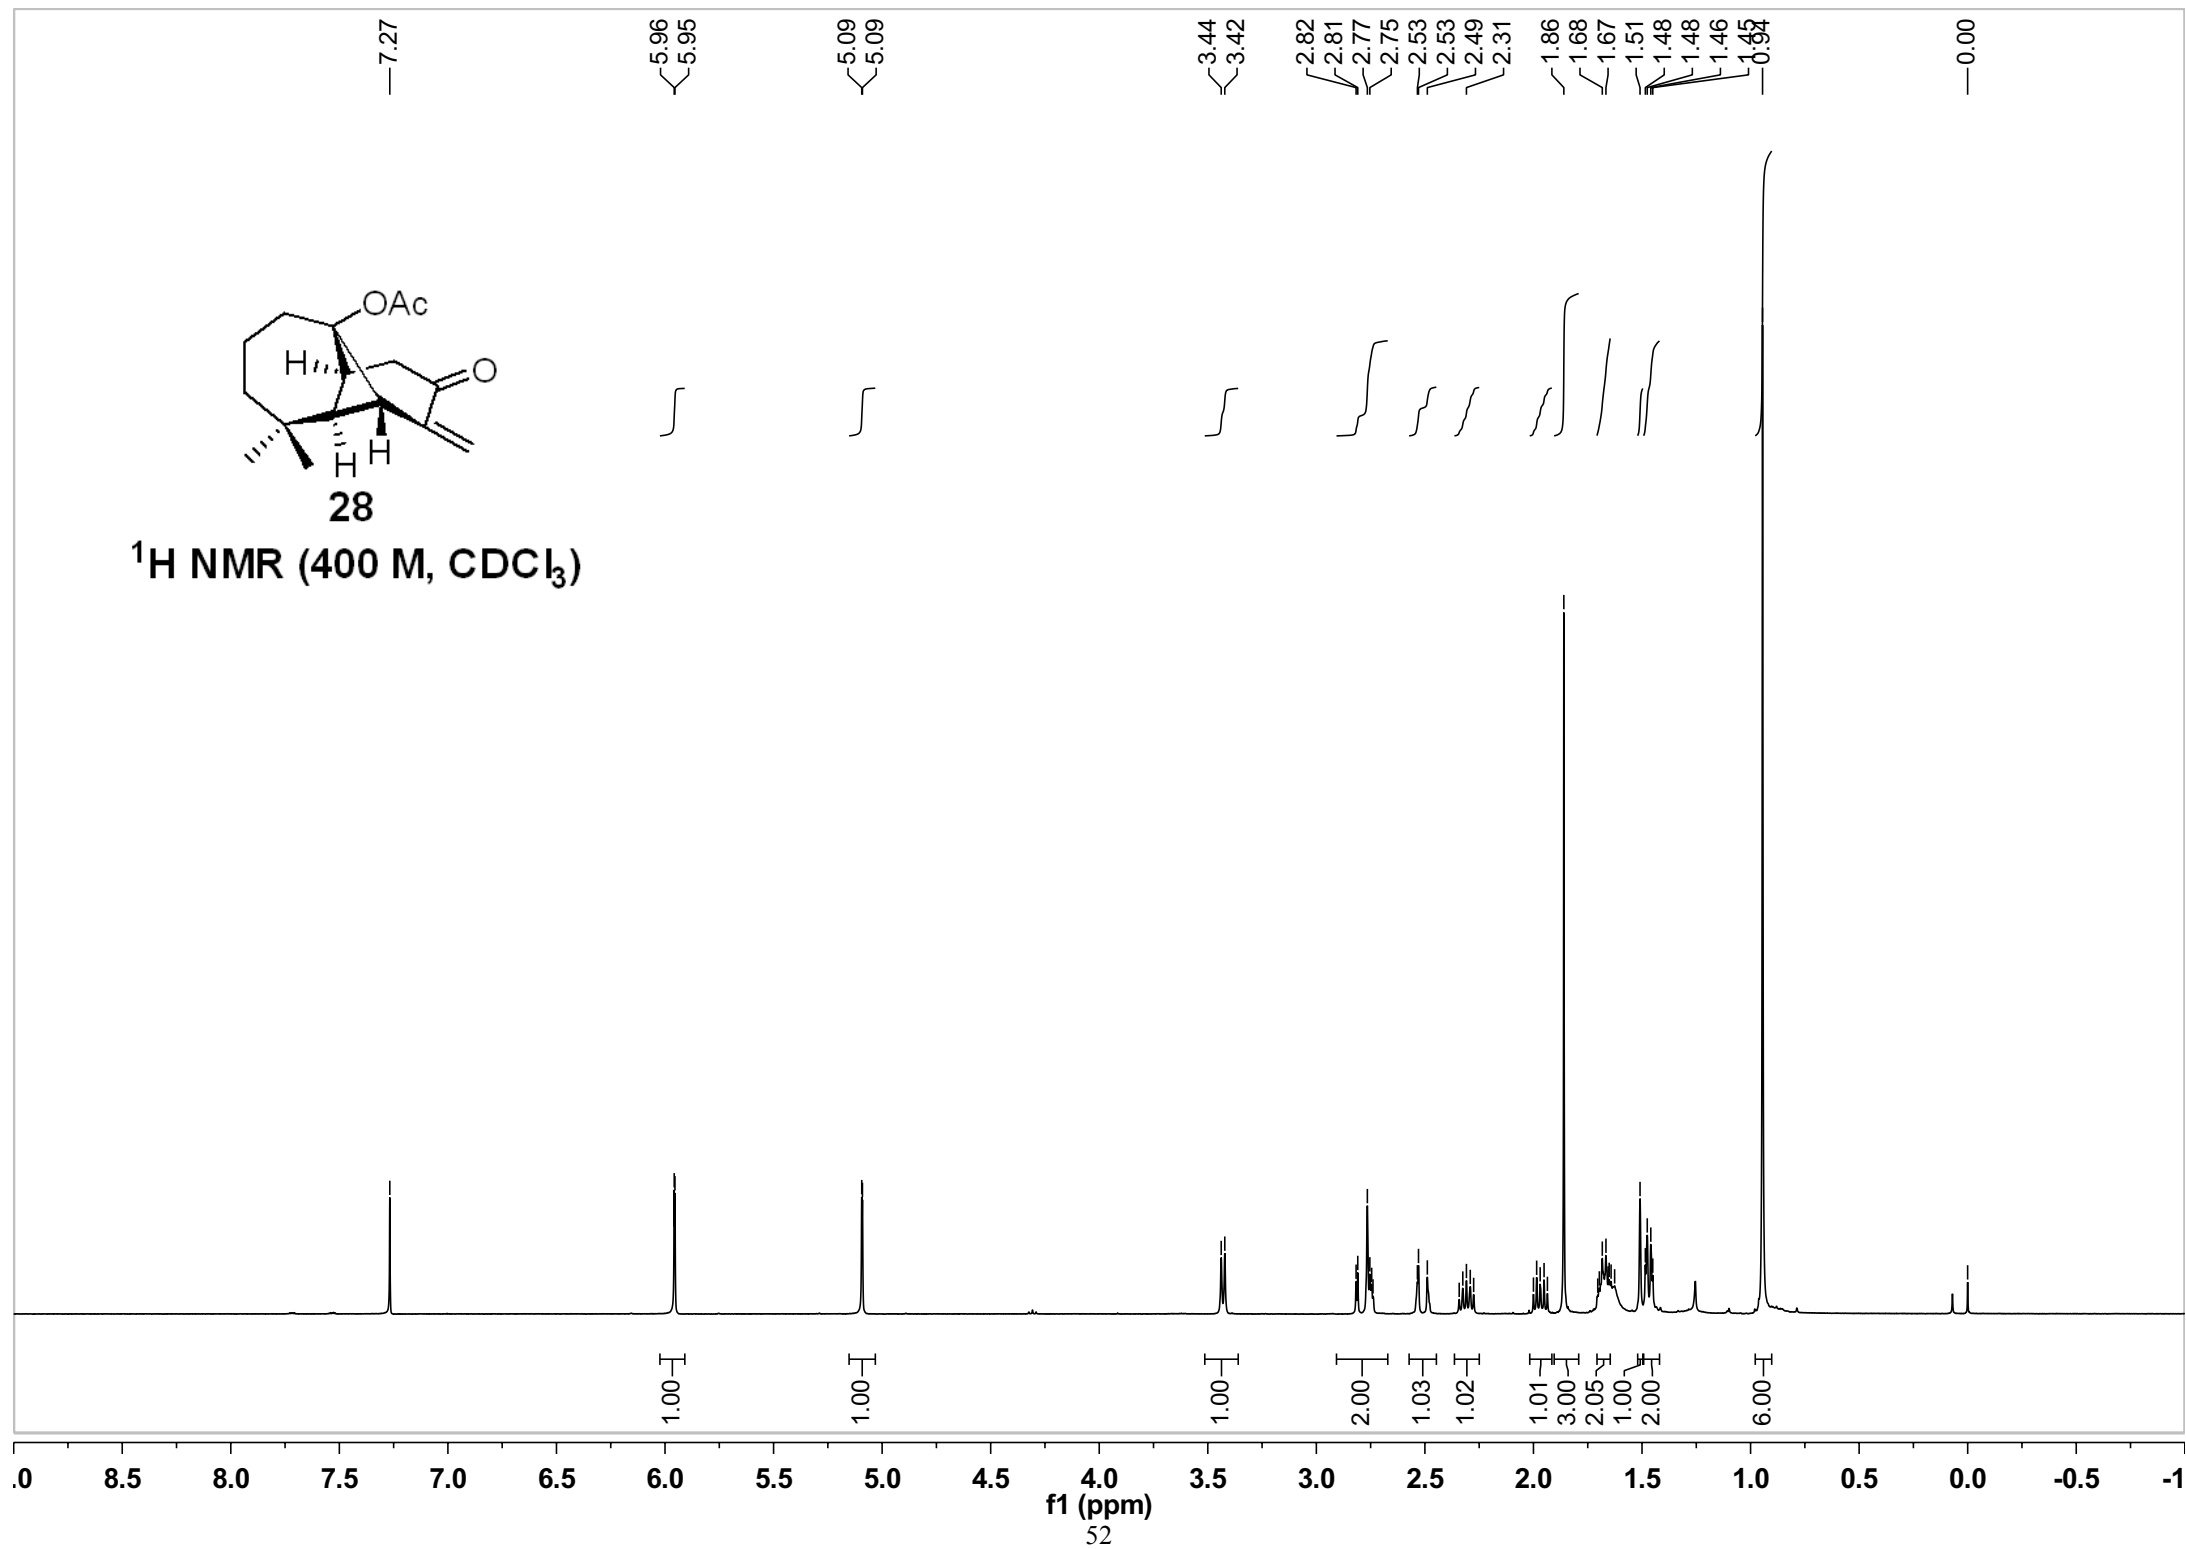

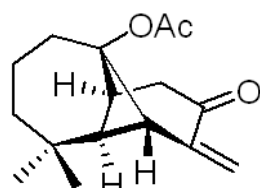

28

<sup>13</sup>C NMR (100M, CDCl<sub>3</sub>)

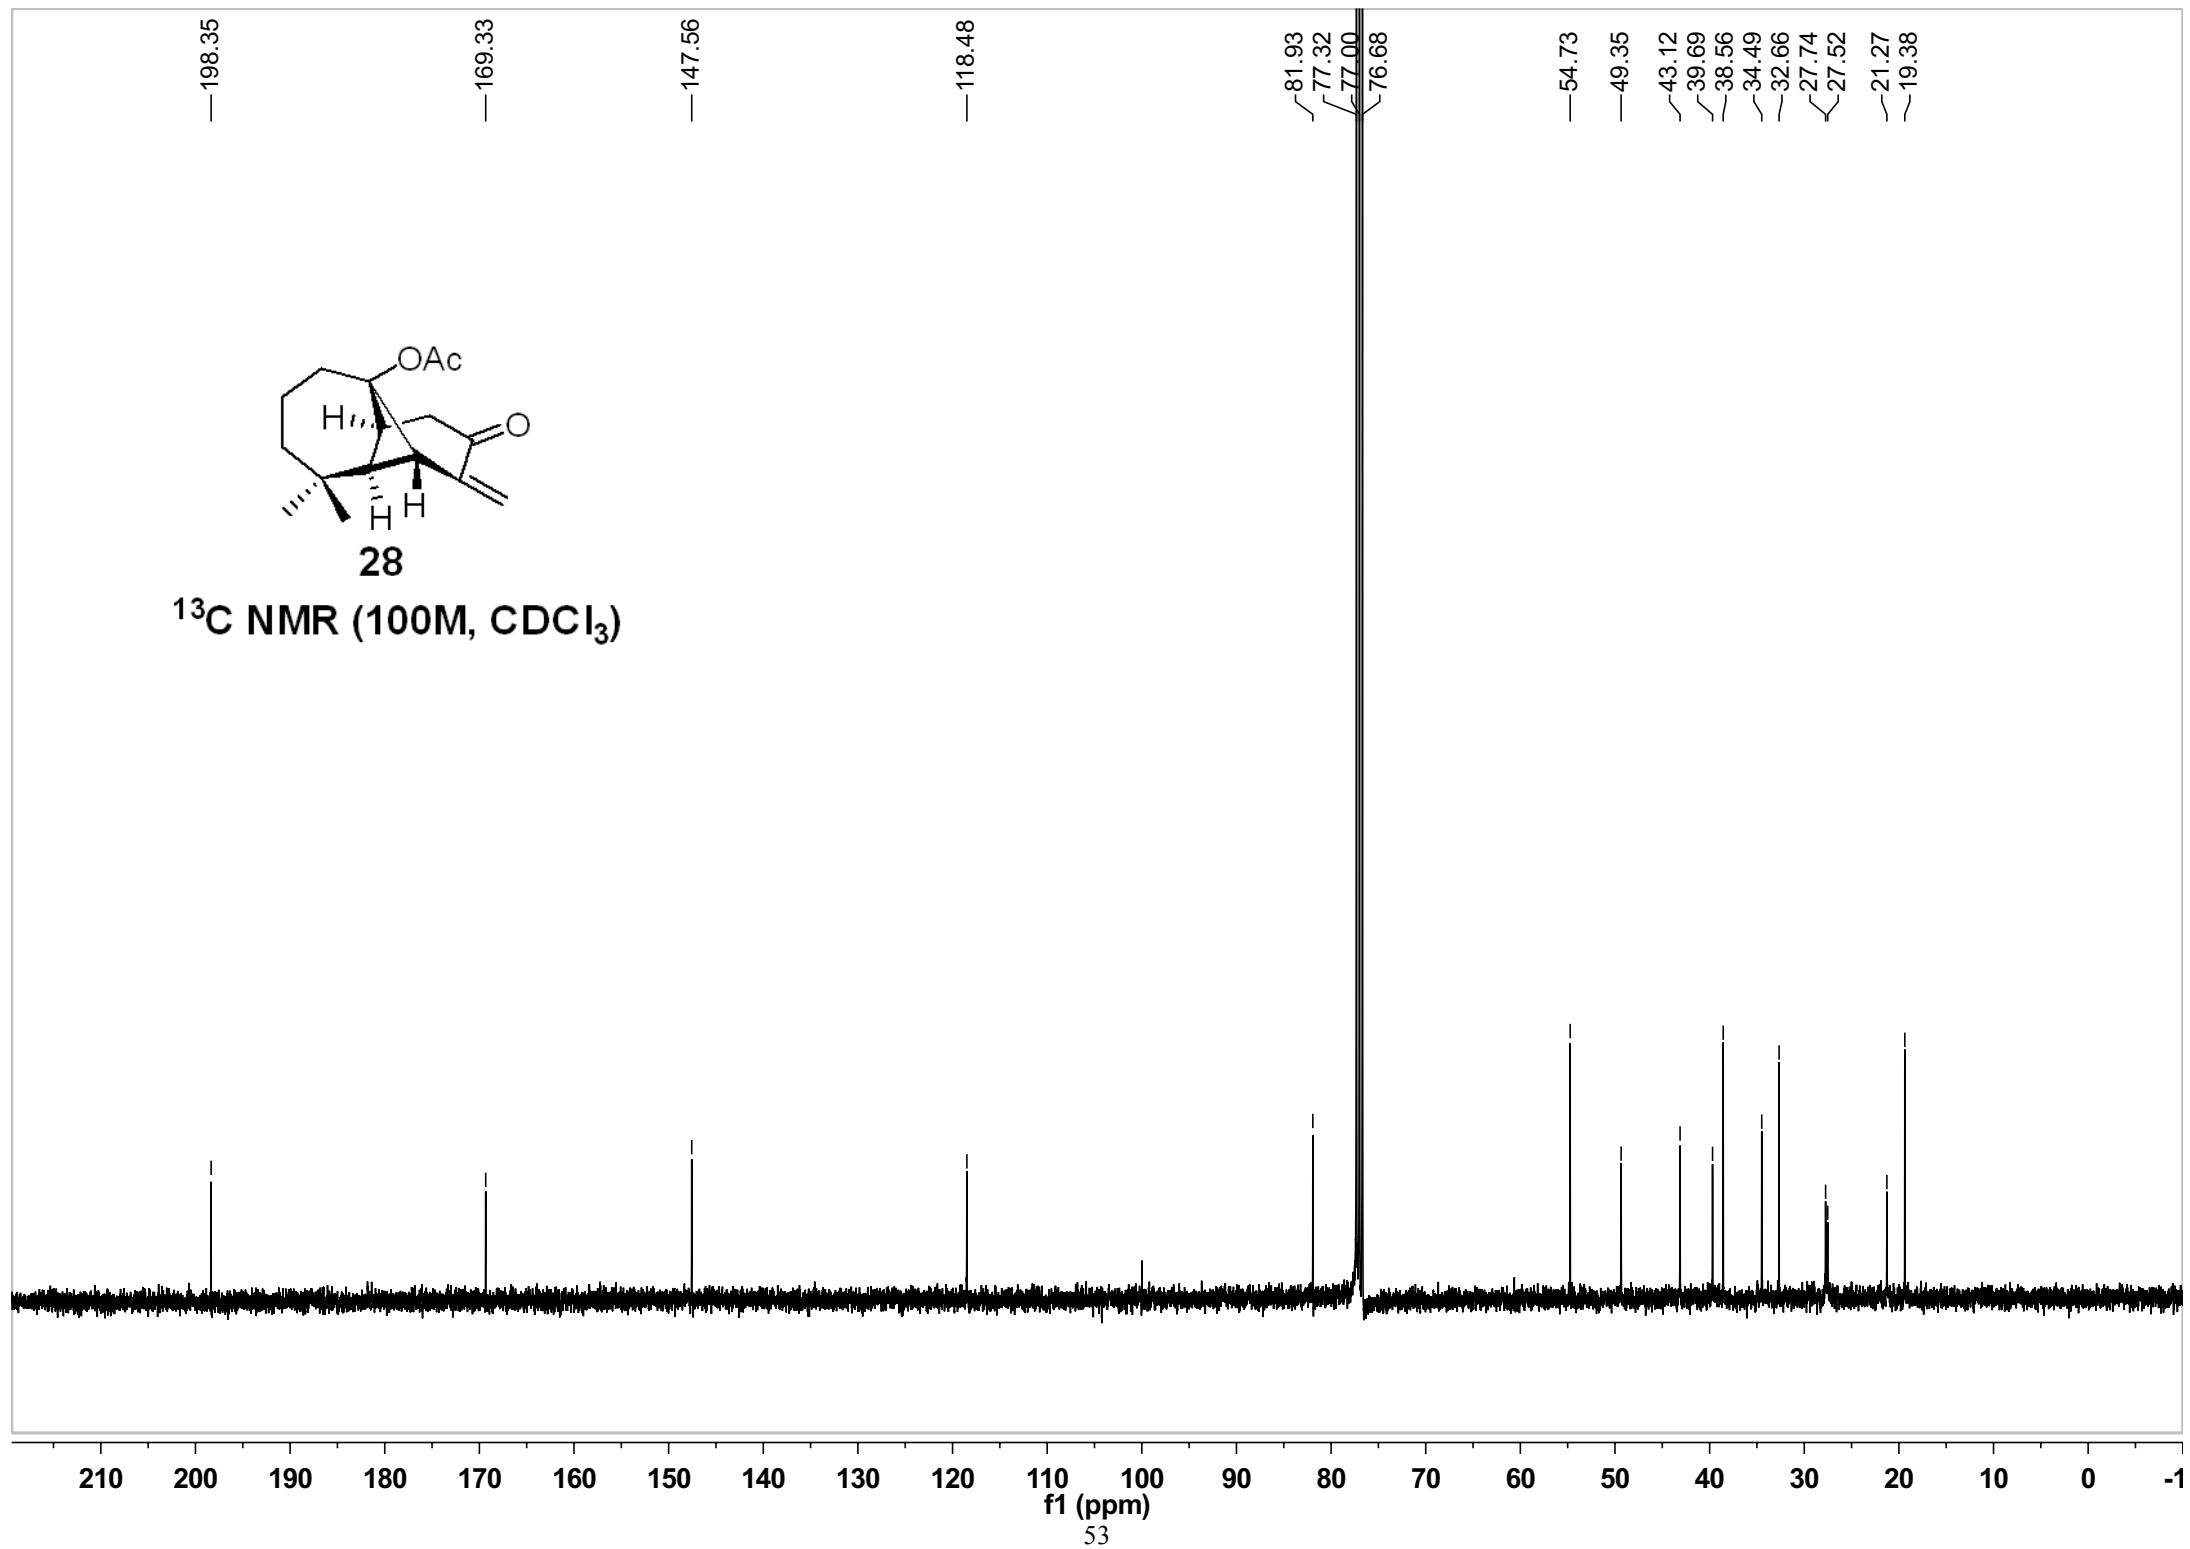

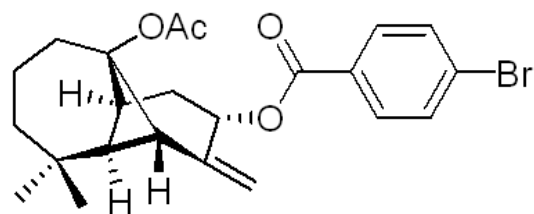

**S-5**

**<sup>1</sup>H NMR (400 M, CDCl<sub>3</sub>)**

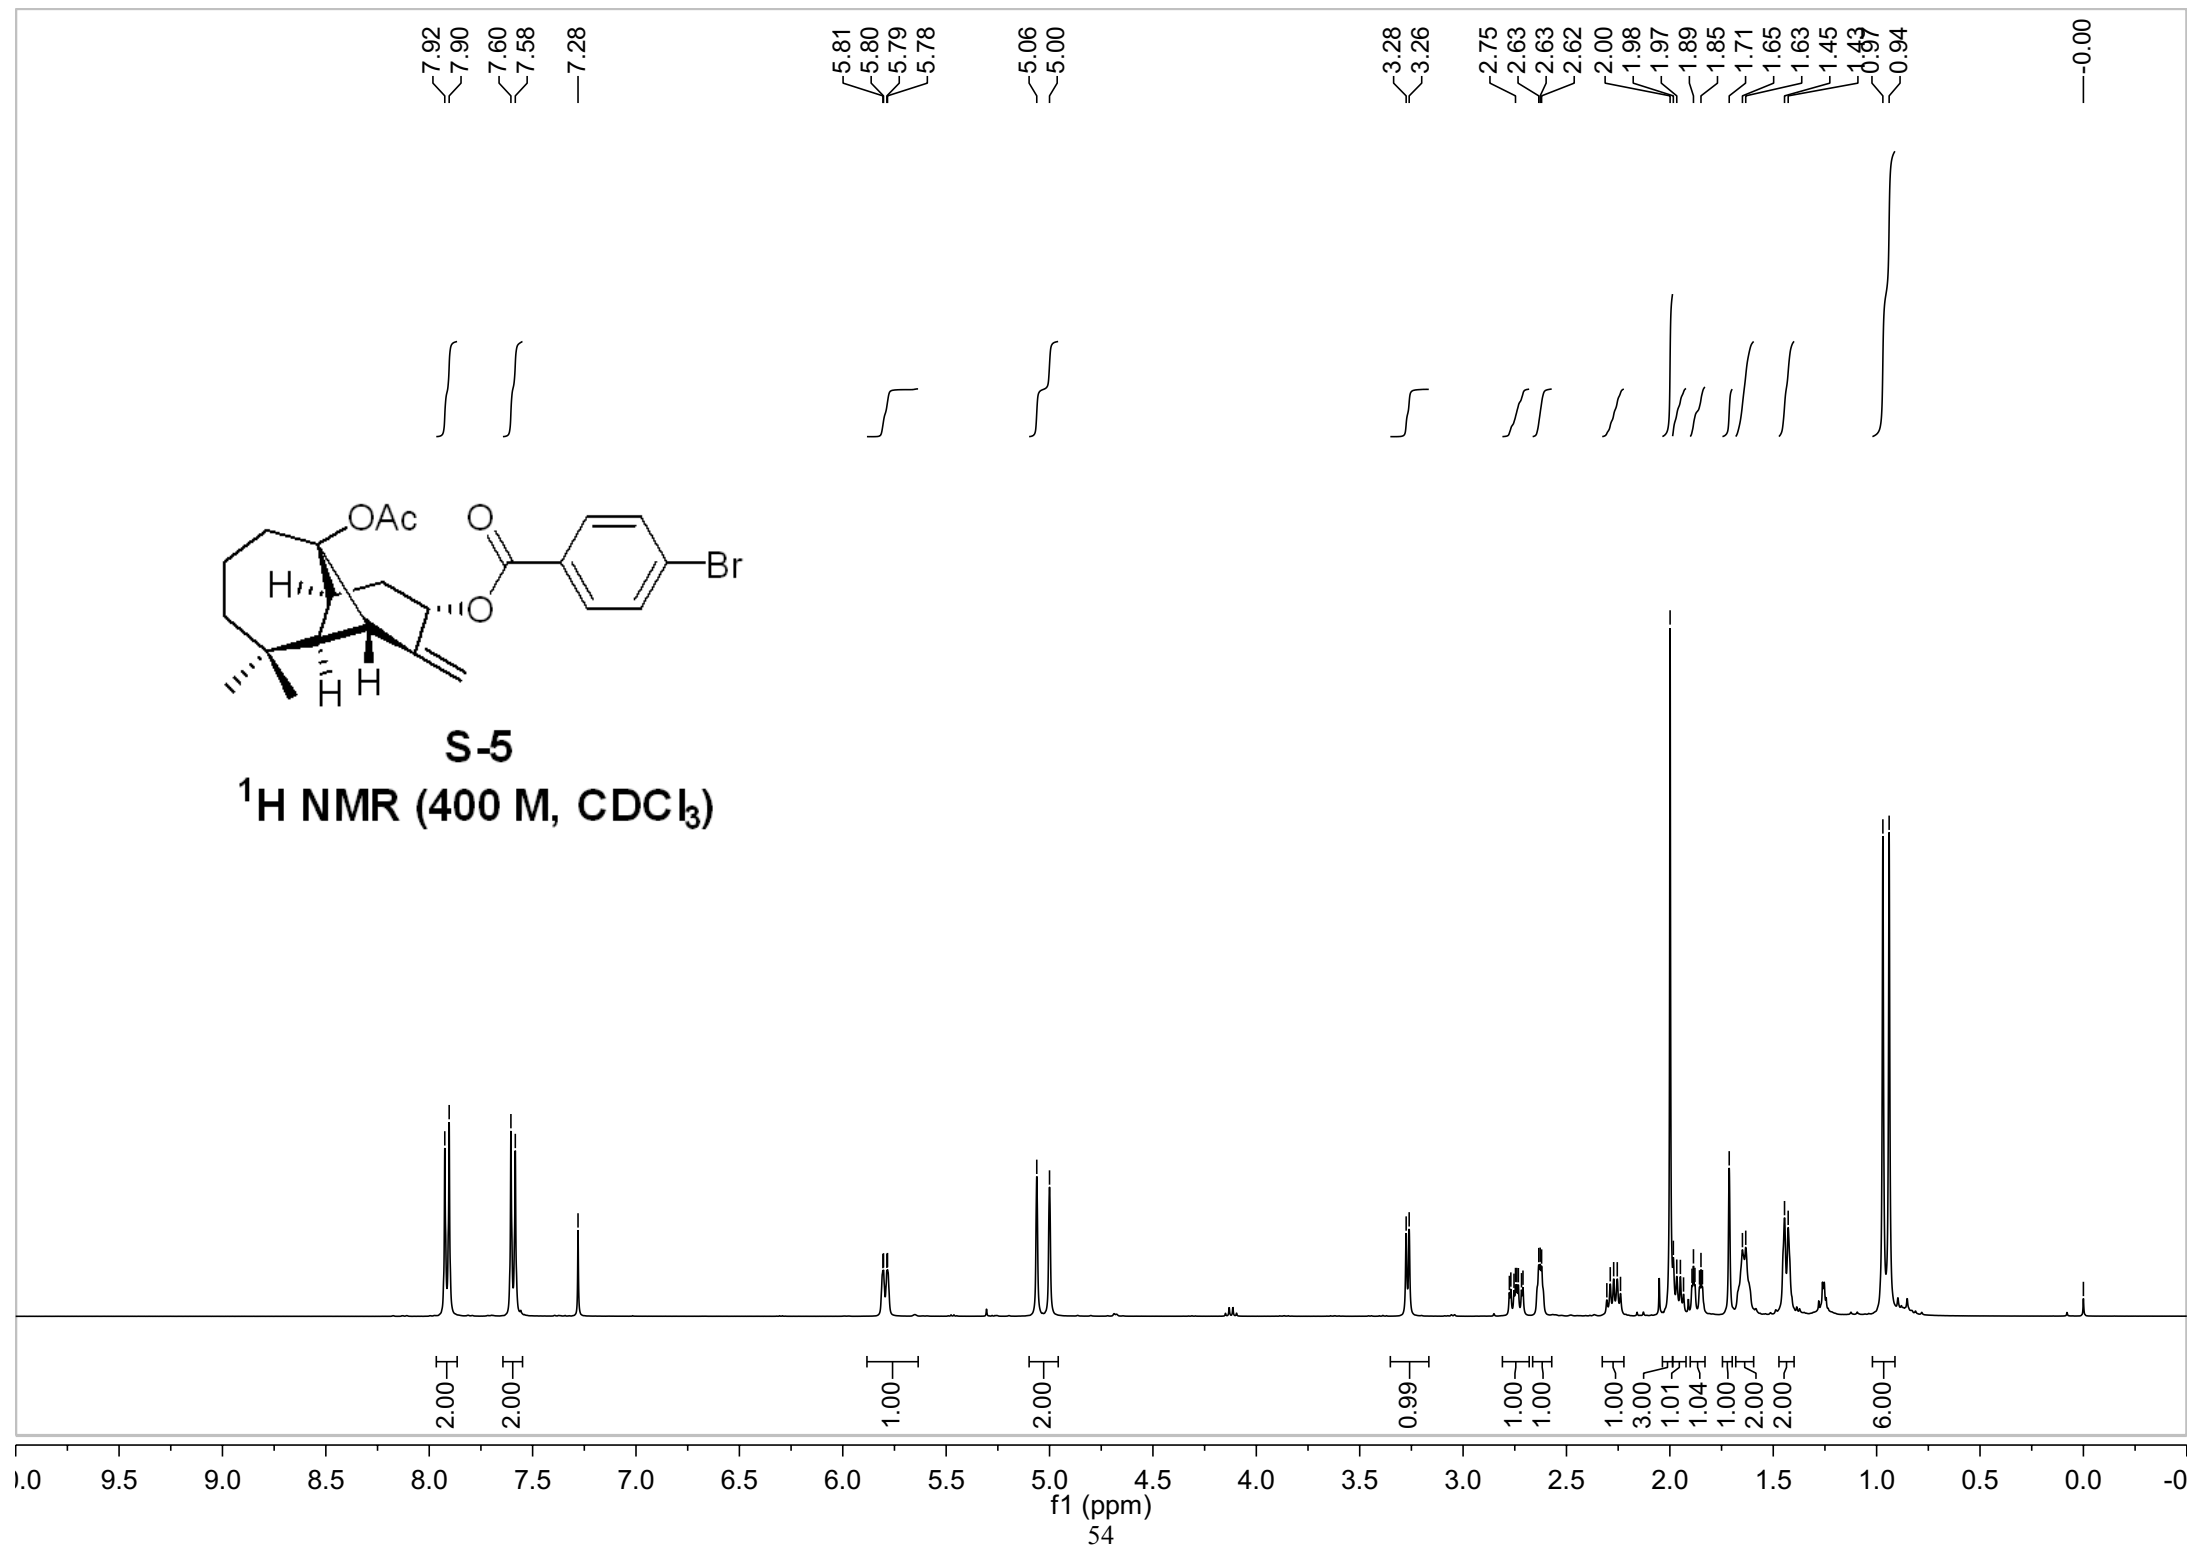

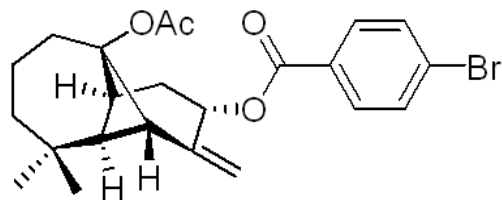

**S-5**

**$^{13}\text{C}$  NMR (100M,  $\text{CDCl}_3$ )**

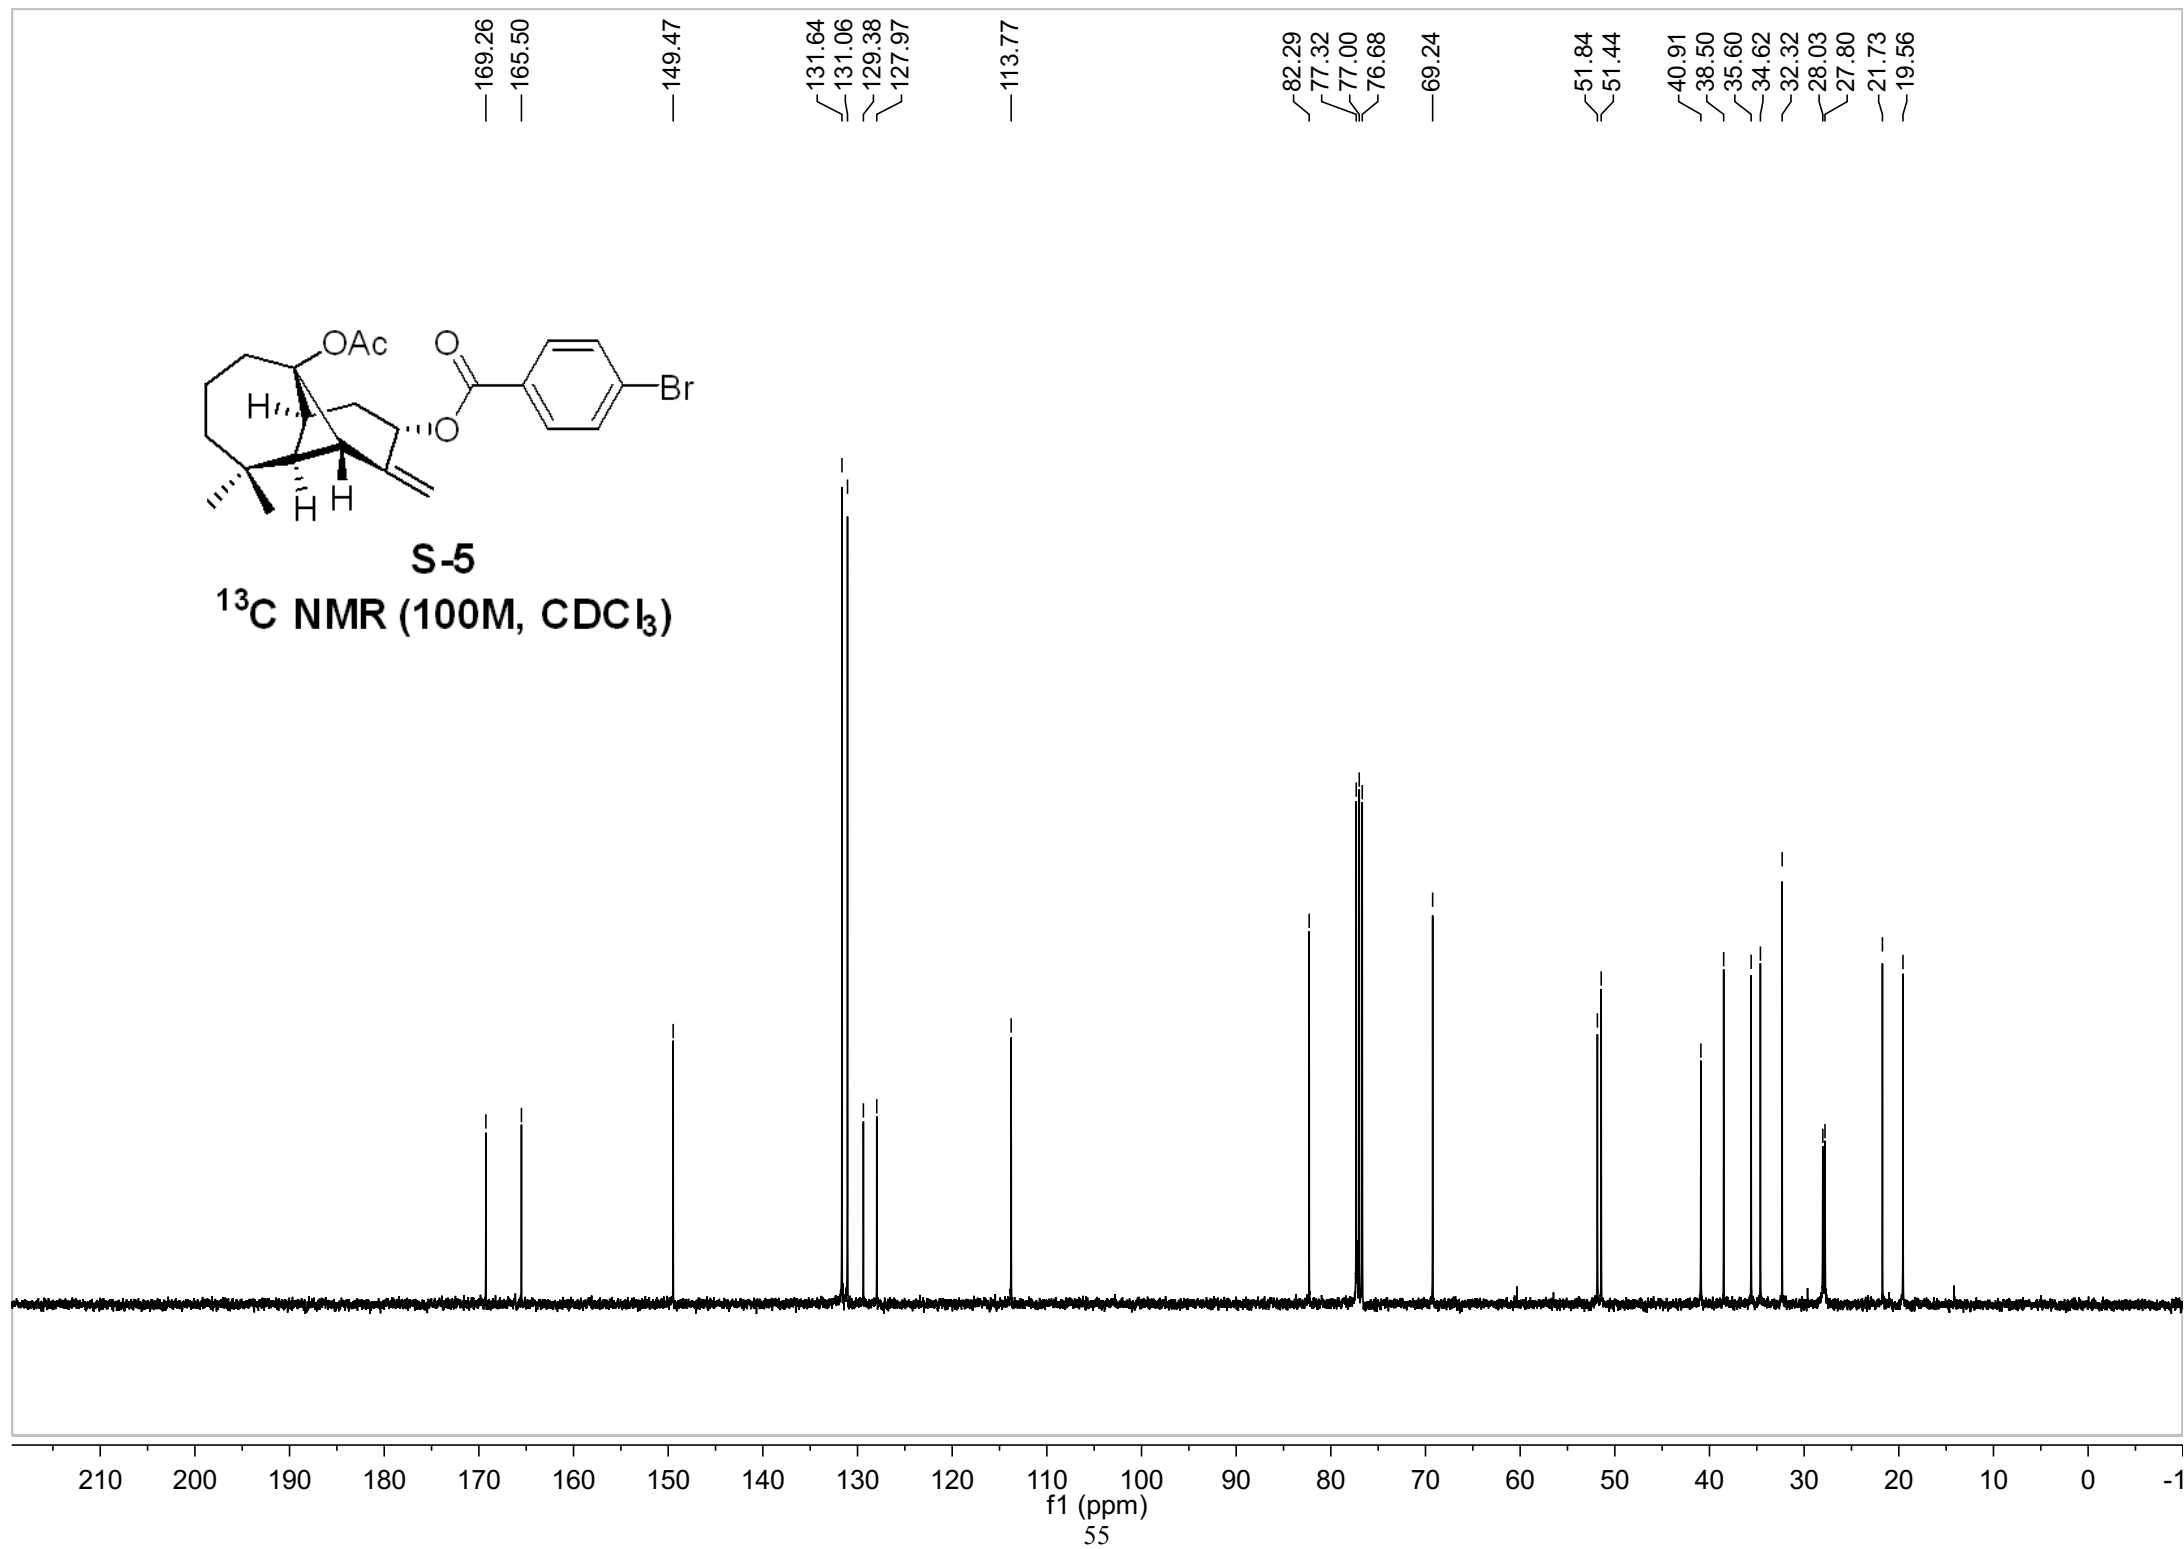

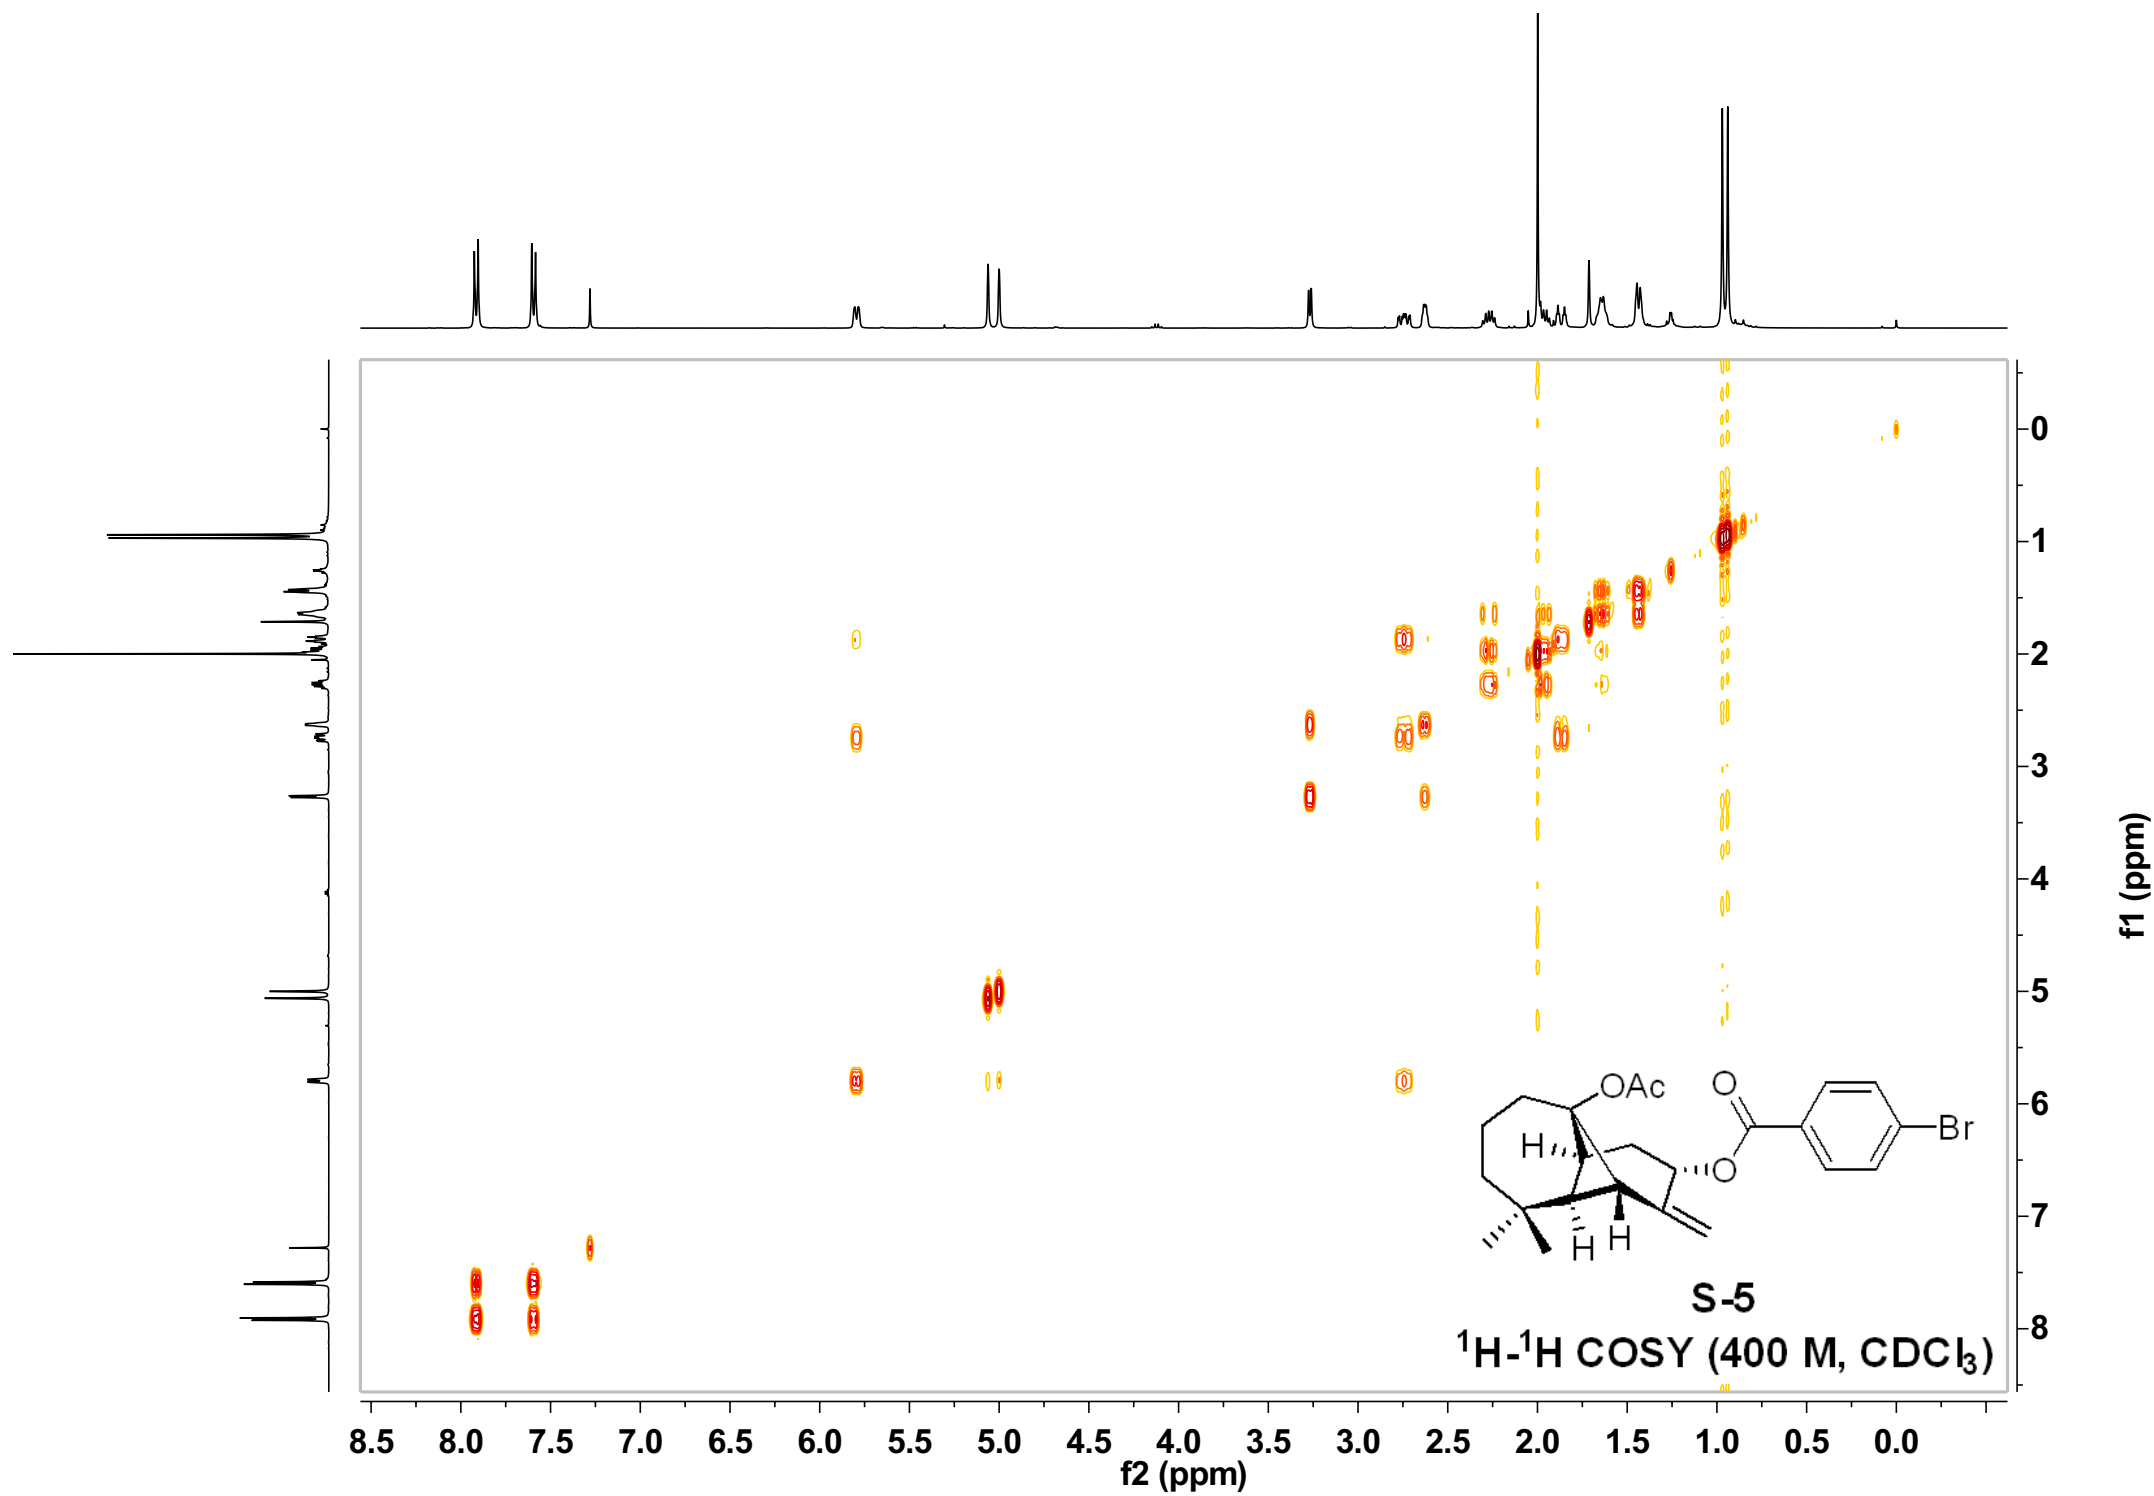



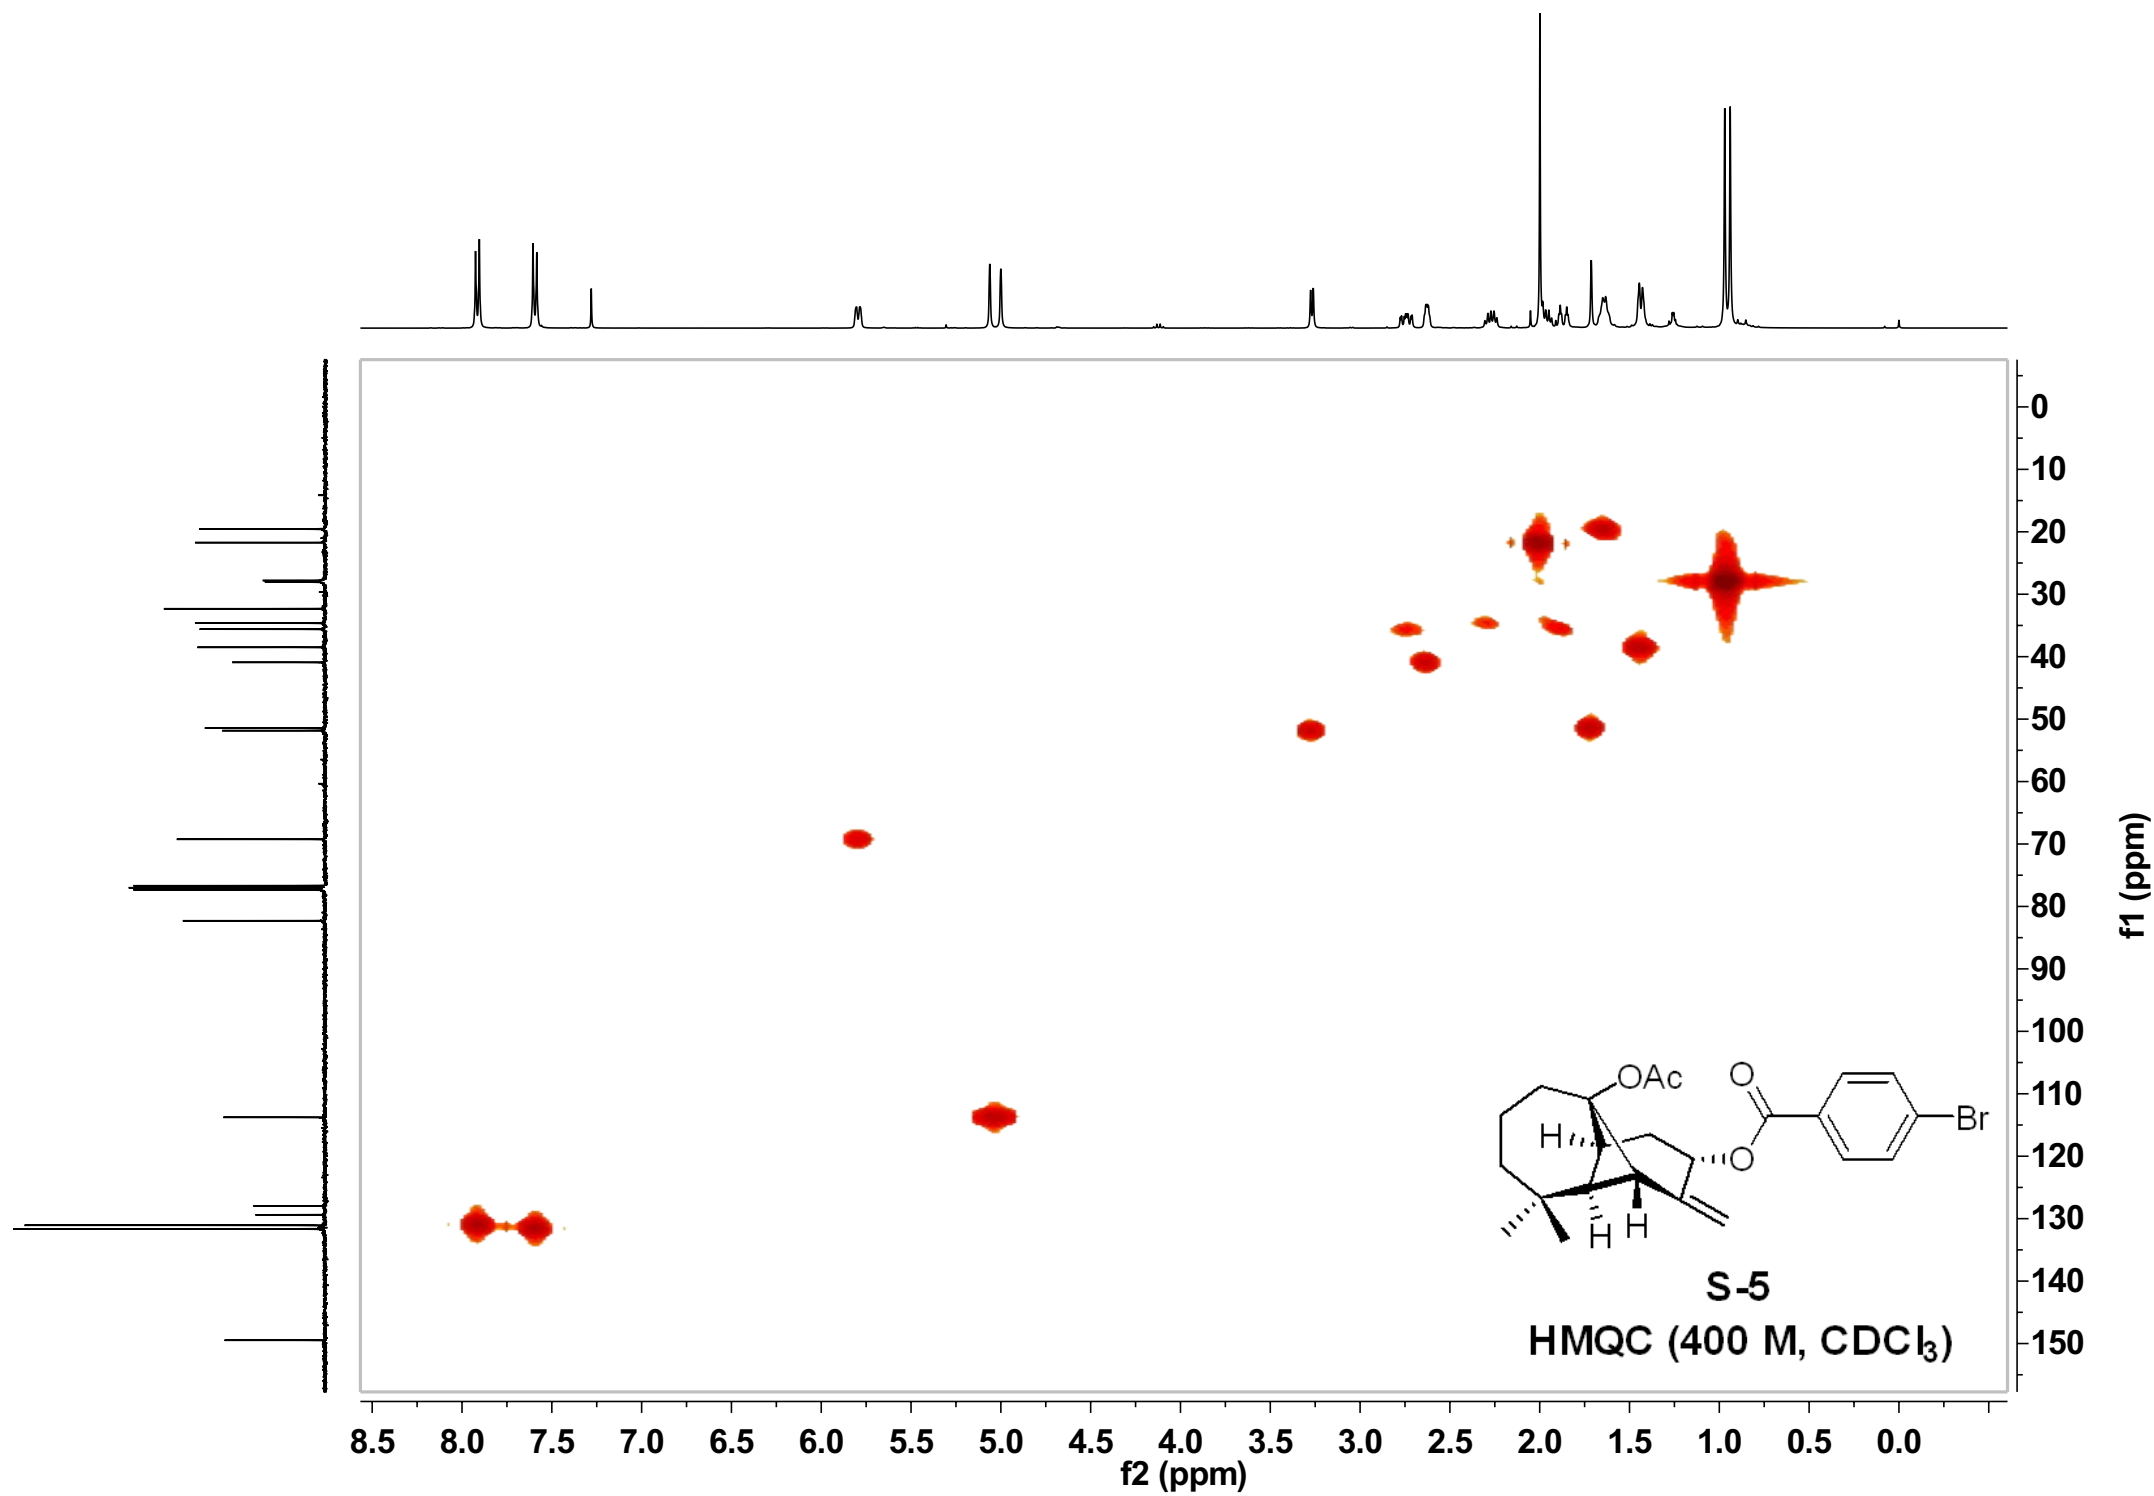

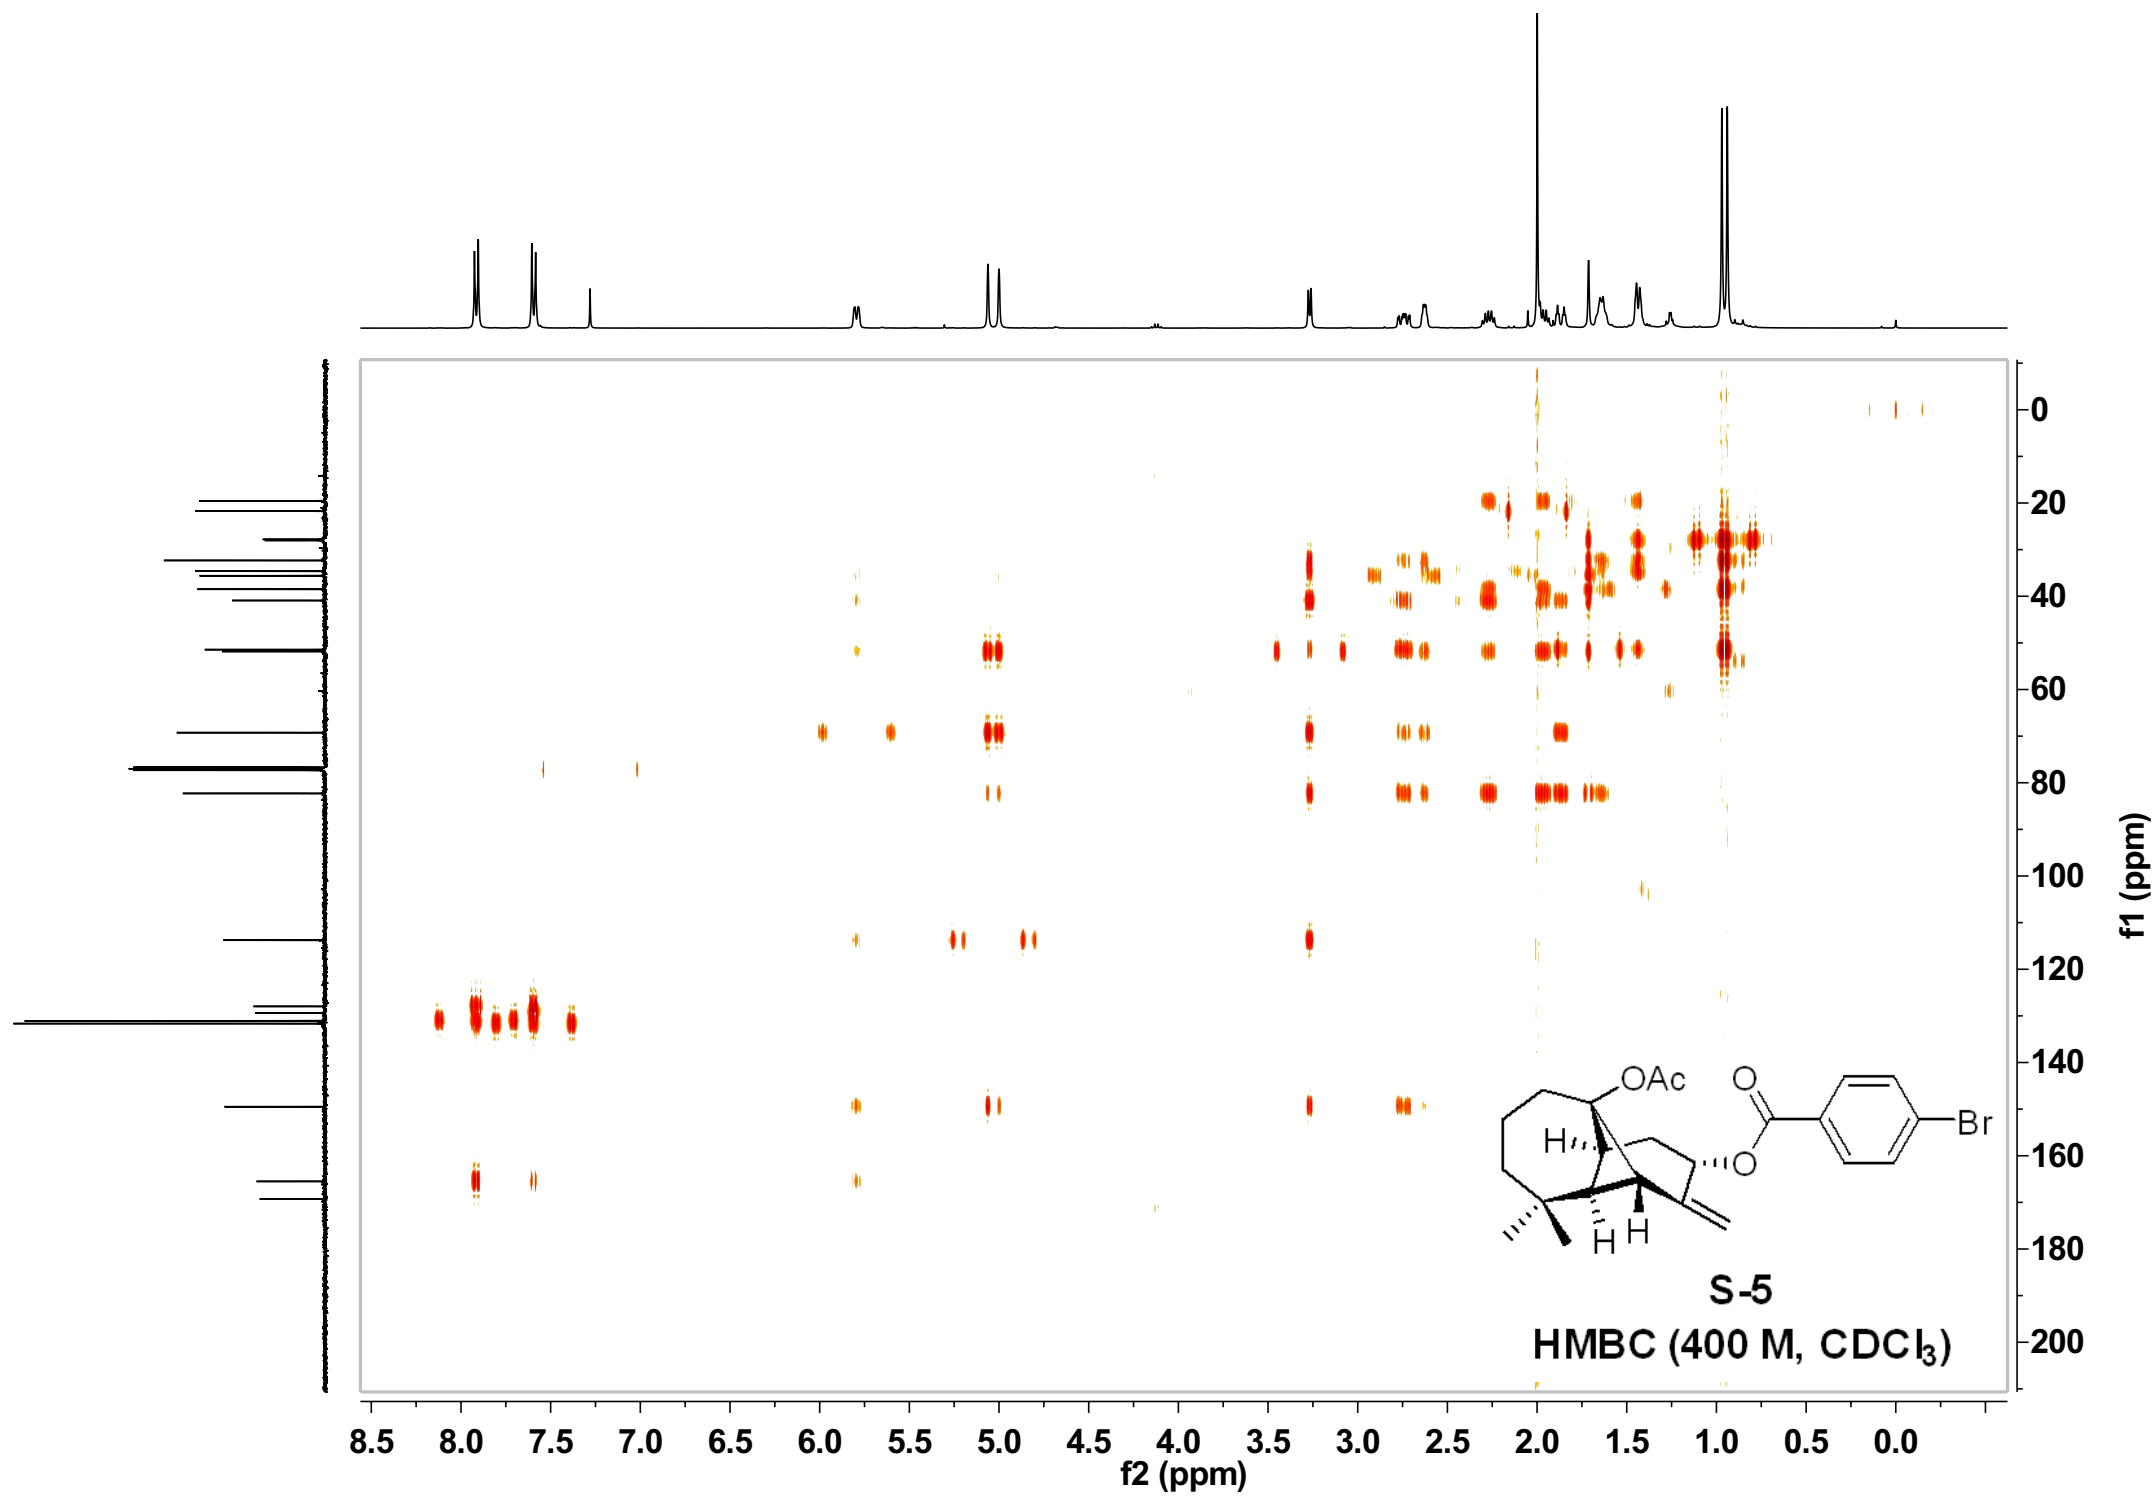

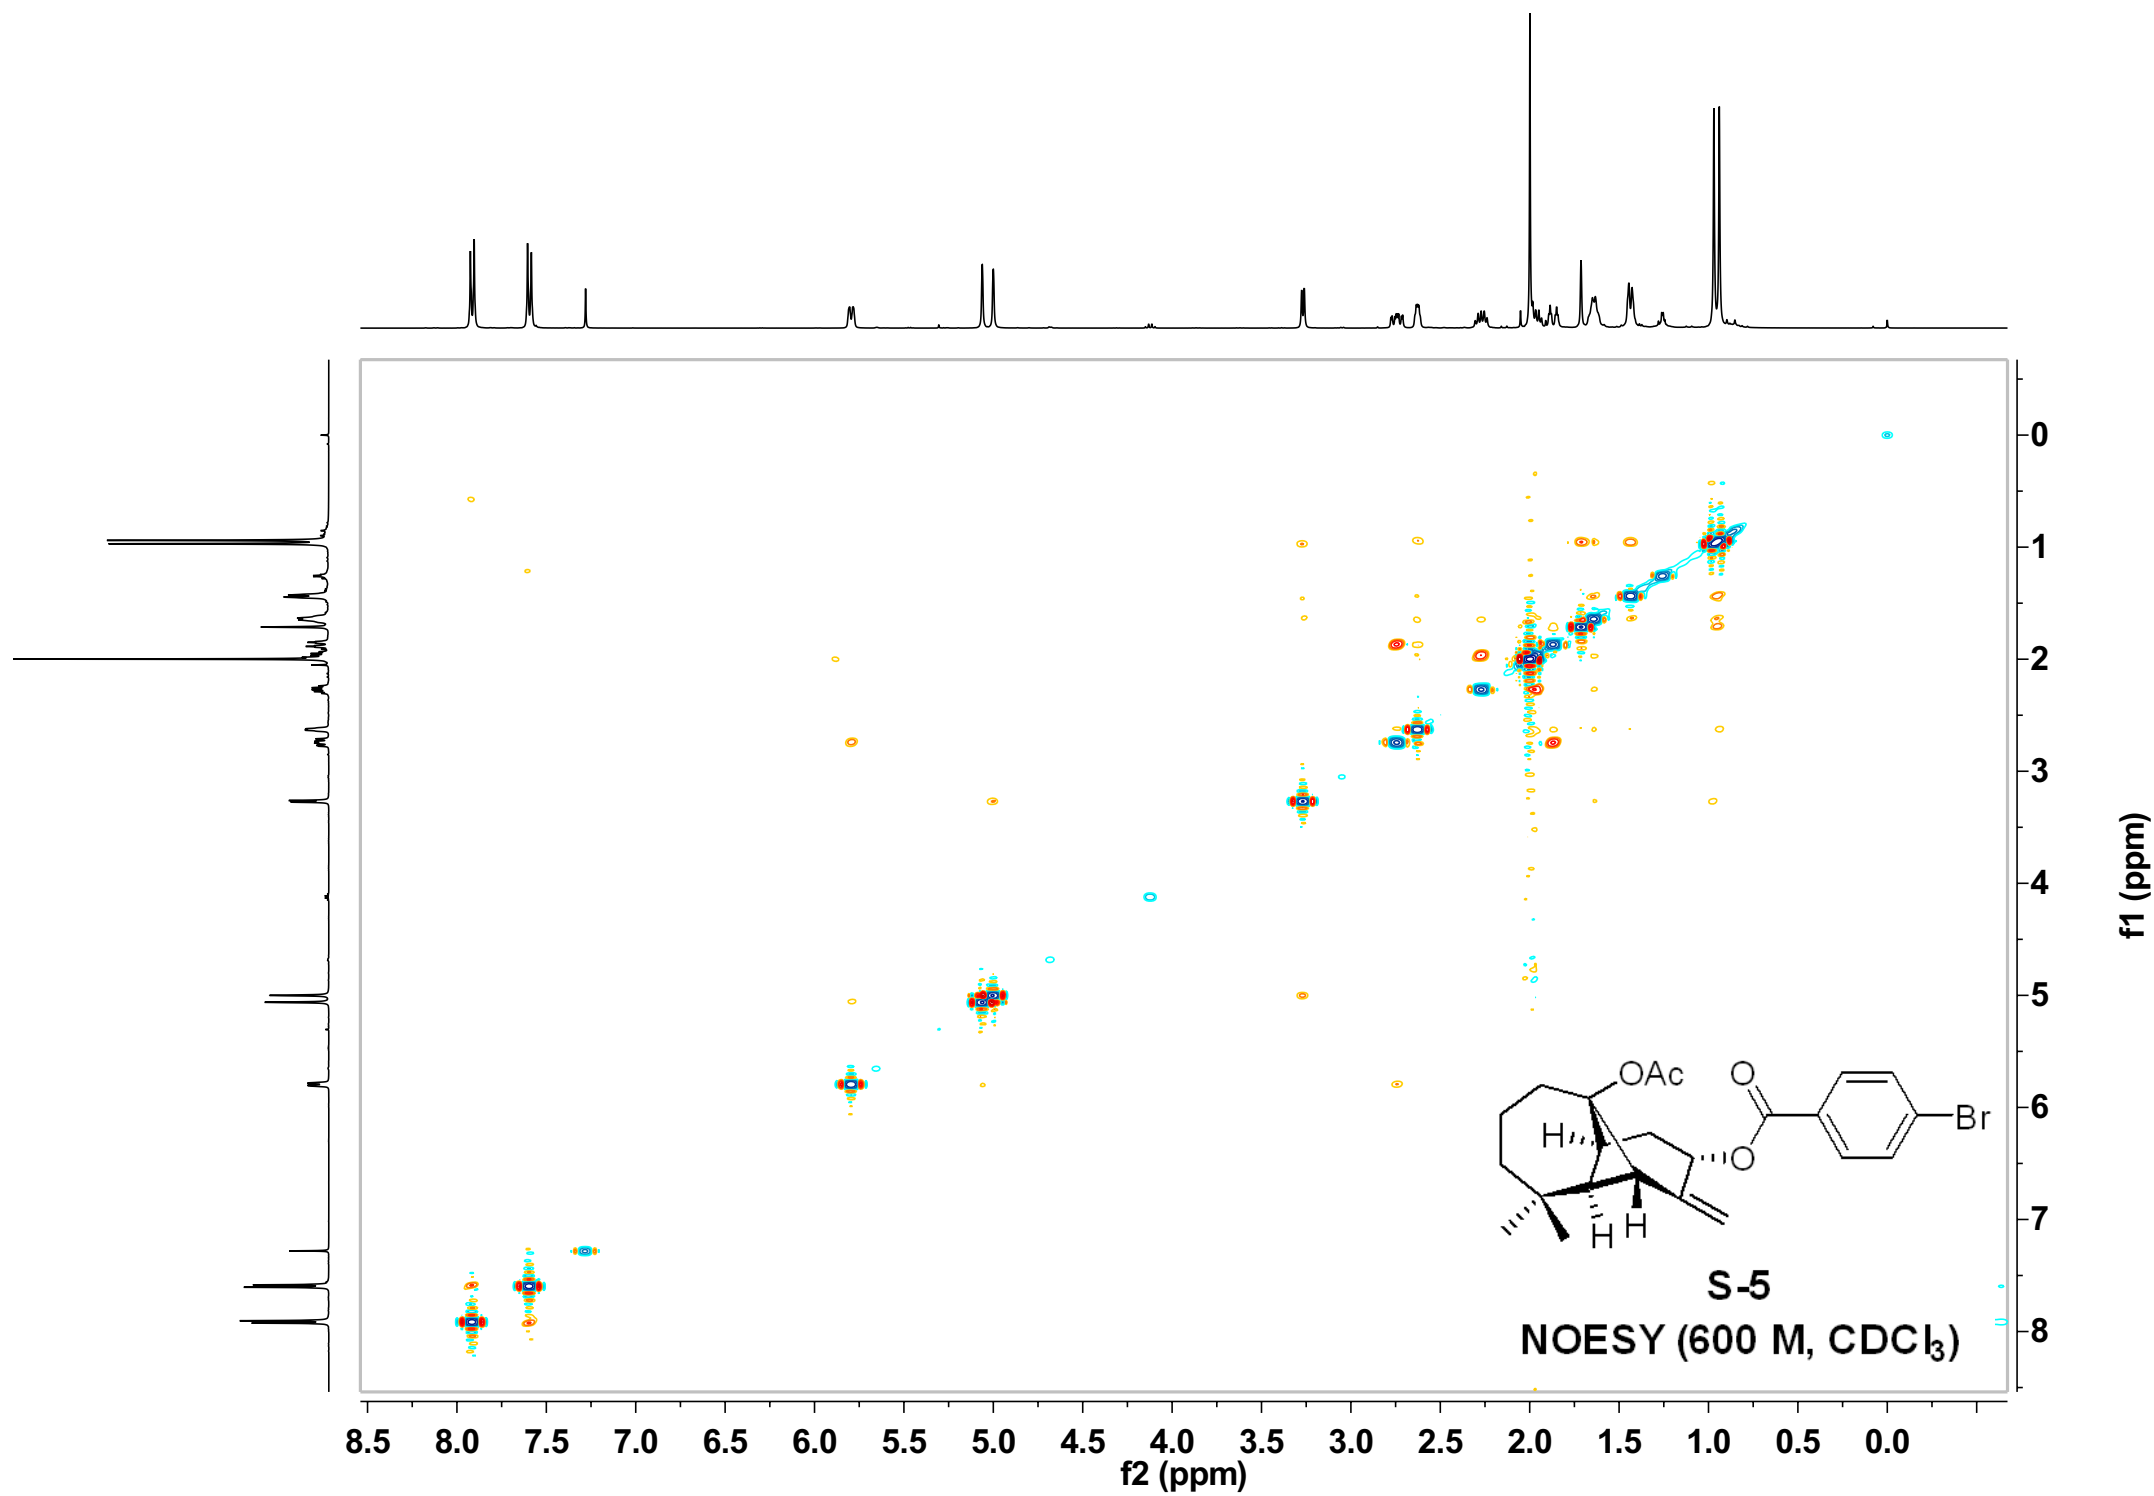

Supplement: c8qo01235k1.pdf [file c8qo01235k1.pdf]
